# Supplementary material
Source: publisher figshare collection journal article supplement (https://acs.figshare.com/ndownloader/files/3728575)
Supplement: Supplementary file 1 [file 3728575]

 
data_shelx
 
_audit_creation_method            SHELXL-2014
_chemical_name_systematic
;
 ?
;
_chemical_name_common             ?
_chemical_melting_point           ?
_chemical_formula_moiety   'C15 H13 N O3' 
_chemical_formula_sum      'C15 H13 N O3' 
_chemical_formula_weight          255.26
_chemical_absolute_configuration    'rm'

loop_
 _atom_type_symbol
 _atom_type_description
 _atom_type_scat_dispersion_real
 _atom_type_scat_dispersion_imag
 _atom_type_scat_source
 'C'  'C'   0.0033   0.0016
 'International Tables Vol C Tables 4.2.6.8 and 6.1.1.4'
 'H'  'H'   0.0000   0.0000
 'International Tables Vol C Tables 4.2.6.8 and 6.1.1.4'
 'N'  'N'   0.0061   0.0033
 'International Tables Vol C Tables 4.2.6.8 and 6.1.1.4'
 'O'  'O'   0.0106   0.0060
 'International Tables Vol C Tables 4.2.6.8 and 6.1.1.4'
 
_space_group_crystal_system       monoclinic
_space_group_IT_number            14
_space_group_name_H-M_alt         'P 21/c'
_space_group_name_Hall            '-P 2ybc'
 
_shelx_space_group_comment
;
The symmetry employed for this shelxl refinement is uniquely defined
by the following loop, which should always be used as a source of
symmetry information in preference to the above space-group names.
They are only intended as comments.
;
 
loop_
 _space_group_symop_operation_xyz
 'x, y, z'
 '-x, y+1/2, -z+1/2'
 '-x, -y, -z'
 'x, -y-1/2, z-1/2'
 
_cell_length_a                    4.8045(2)
_cell_length_b                    25.7786(10)
_cell_length_c                    9.8034(4)
_cell_angle_alpha                 90
_cell_angle_beta                  95.380(2)
_cell_angle_gamma                 90
_cell_volume                      1208.83(8)
_cell_formula_units_Z             4
_cell_measurement_temperature     296(2)
_cell_measurement_reflns_used     4510
_cell_measurement_theta_min       2.62
_cell_measurement_theta_max       27.93

_exptl_crystal_description       'block'
_exptl_crystal_colour            'colourless' 
_exptl_crystal_density_meas       1.402 
_exptl_crystal_density_method     NONE              
_exptl_crystal_density_diffrn     1.403          
_exptl_crystal_F_000              536
_exptl_transmission_factor_min    ?                                             
_exptl_transmission_factor_max    ?                                             
_exptl_crystal_size_max           0.250
_exptl_crystal_size_mid           0.200
_exptl_crystal_size_min           0.150
_exptl_absorpt_coefficient_mu     0.099
_shelx_estimated_absorpt_T_min    0.976
_shelx_estimated_absorpt_T_max    0.985
_exptl_absorpt_correction_type    'multi-scan' 
_exptl_absorpt_correction_T_min   0.9758  
_exptl_absorpt_correction_T_max   0.9854  
_exptl_absorpt_process_details    'SADABS'
 
_exptl_special_details
;
 ?
;
 
_diffrn_ambient_temperature       296(2)
_diffrn_radiation_wavelength      0.71073
_diffrn_radiation_type            MoK\a
_diffrn_source                    'sealed tube'
_diffrn_measurement_device_type  'Bruker APEX-II CCD'
_diffrn_measurement_method       '\f and \w scans'
_diffrn_detector_area_resol_mean   0 
_diffrn_reflns_number             10129
_diffrn_reflns_av_unetI/netI      0.0162
_diffrn_reflns_av_R_equivalents   0.0187
_diffrn_reflns_limit_h_min        -6
_diffrn_reflns_limit_h_max        6
_diffrn_reflns_limit_k_min        -31
_diffrn_reflns_limit_k_max        32
_diffrn_reflns_limit_l_min        -12
_diffrn_reflns_limit_l_max        12
_diffrn_reflns_theta_min          3.159
_diffrn_reflns_theta_max          26.366
_diffrn_reflns_theta_full         25.242
_diffrn_measured_fraction_theta_max   0.998
_diffrn_measured_fraction_theta_full  0.997
_diffrn_reflns_Laue_measured_fraction_max    0.998
_diffrn_reflns_Laue_measured_fraction_full   0.997
_diffrn_reflns_point_group_measured_fraction_max   0.998
_diffrn_reflns_point_group_measured_fraction_full  0.997
_reflns_number_total              2444
_reflns_number_gt                 1911
_reflns_threshold_expression      'I > 2\s(I)'
_reflns_Friedel_coverage          0.000
_reflns_Friedel_fraction_max      .
_reflns_Friedel_fraction_full     .
 
_reflns_special_details
;
 Reflections were merged by SHELXL according to the crystal
 class for the calculation of statistics and refinement.
 
 _reflns_Friedel_fraction is defined as the number of unique
 Friedel pairs measured divided by the number that would be
 possible theoretically, ignoring centric projections and
 systematic absences.
;
 
_computing_data_collection      'Bruker APEX2'
_computing_cell_refinement      'Bruker SAINT'
_computing_data_reduction       'Bruker SAINT'
_computing_structure_solution    'SHELXL-2014 (Sheldrick, 2014)'
_computing_structure_refinement  'SHELXL-2014 (Sheldrick, 2014)'
_computing_molecular_graphics   'Bruker SHELXTL'
_computing_publication_material 'Bruker SHELXTL'
 
_refine_special_details
;
 ?
;
_refine_ls_structure_factor_coef  Fsqd
_refine_ls_matrix_type            full
_refine_ls_weighting_scheme       calc
_refine_ls_weighting_details
'w=1/[\s^2^(Fo^2^)+(0.0804P)^2^+0.1275P] where P=(Fo^2^+2Fc^2^)/3'
_atom_sites_solution_primary      ?
_atom_sites_solution_secondary    ?
_atom_sites_solution_hydrogens    geom
_refine_ls_hydrogen_treatment     constr
_refine_ls_extinction_method      none
_refine_ls_extinction_coef        .
_refine_ls_number_reflns          2444
_refine_ls_number_parameters      173
_refine_ls_number_restraints      0
_refine_ls_R_factor_all           0.0526
_refine_ls_R_factor_gt            0.0404
_refine_ls_wR_factor_ref          0.1340
_refine_ls_wR_factor_gt           0.1191
_refine_ls_goodness_of_fit_ref    1.051
_refine_ls_restrained_S_all       1.051
_refine_ls_shift/su_max           0.001
_refine_ls_shift/su_mean          0.000
 
loop_
 _atom_site_label
 _atom_site_type_symbol
 _atom_site_fract_x
 _atom_site_fract_y
 _atom_site_fract_z
 _atom_site_U_iso_or_equiv
 _atom_site_adp_type
 _atom_site_occupancy
 _atom_site_site_symmetry_order  
 _atom_site_calc_flag
 _atom_site_refinement_flags_posn
 _atom_site_refinement_flags_adp
 _atom_site_refinement_flags_occupancy
 _atom_site_disorder_assembly
 _atom_site_disorder_group
C1 C -0.0863(2) 0.64405(5) 0.84037(12) 0.0410(3) Uani 1 1 d . . . . .
C2 C -0.0454(3) 0.59010(5) 0.83338(13) 0.0428(3) Uani 1 1 d . . . . .
C3 C -0.1786(3) 0.55730(7) 0.91688(16) 0.0583(4) Uani 1 1 d . . . . .
H3 H -0.1534 0.5216 0.9103 0.070 Uiso 1 1 calc R U . . .
C4 C -0.3507(4) 0.57701(9) 1.01110(17) 0.0716(5) Uani 1 1 d . . . . .
H4 H -0.4372 0.5545 1.0680 0.086 Uiso 1 1 calc R U . . .
C5 C -0.3933(3) 0.62904(9) 1.02049(16) 0.0698(5) Uani 1 1 d . . . . .
H5 H -0.5091 0.6416 1.0839 0.084 Uiso 1 1 calc R U . . .
C6 C -0.2645(3) 0.66440(7) 0.93543(14) 0.0538(4) Uani 1 1 d . . . . .
C7 C -0.3030(4) 0.71862(8) 0.93925(18) 0.0691(5) Uani 1 1 d . . . . .
H7 H -0.4192 0.7326 1.0005 0.083 Uiso 1 1 calc R U . . .
C8 C -0.1744(4) 0.75066(7) 0.8557(2) 0.0708(5) Uani 1 1 d . . . . .
H8 H -0.2031 0.7863 0.8605 0.085 Uiso 1 1 calc R U . . .
C9 C 0.0024(3) 0.73080(6) 0.76152(17) 0.0559(4) Uani 1 1 d . . . . .
H9 H 0.0898 0.7532 0.7046 0.067 Uiso 1 1 calc R U . . .
C10 C 0.0454(3) 0.67816(5) 0.75406(13) 0.0410(3) Uani 1 1 d . . . . .
C11 C 0.2287(3) 0.65731(5) 0.65525(13) 0.0407(3) Uani 1 1 d . . . . .
C12 C 0.1405(3) 0.56864(5) 0.73638(14) 0.0431(3) Uani 1 1 d . . . . .
C13 C 0.4544(3) 0.58241(6) 0.55591(14) 0.0496(4) Uani 1 1 d . . . . .
H13A H 0.5579 0.5537 0.5997 0.060 Uiso 1 1 calc R U . . .
H13B H 0.5883 0.6089 0.5361 0.060 Uiso 1 1 calc R U . . .
C14 C 0.3030(3) 0.56364(6) 0.42188(16) 0.0571(4) Uani 1 1 d . . . . .
H14A H 0.4397 0.5490 0.3660 0.069 Uiso 1 1 calc R U . . .
H14B H 0.1762 0.5360 0.4420 0.069 Uiso 1 1 calc R U . . .
C15 C 0.1394(4) 0.60445(7) 0.33968(16) 0.0628(4) Uani 1 1 d . . . . .
H15A H 0.0511 0.5887 0.2567 0.075 Uiso 1 1 calc R U . . .
H15B H -0.0075 0.6172 0.3922 0.075 Uiso 1 1 calc R U . . .
N1 N 0.2657(2) 0.60386(4) 0.65226(11) 0.0401(3) Uani 1 1 d . . . . .
O1 O 0.3453(2) 0.68517(4) 0.57723(11) 0.0592(3) Uani 1 1 d . . . . .
O2 O 0.1875(2) 0.52243(4) 0.72686(12) 0.0635(3) Uani 1 1 d . . . . .
O3 O 0.3046(3) 0.64699(5) 0.30326(12) 0.0783(4) Uani 1 1 d . . . . .
H3A H 0.3282 0.6671 0.3681 0.117 Uiso 1 1 calc R U . . .
 
loop_
 _atom_site_aniso_label
 _atom_site_aniso_U_11
 _atom_site_aniso_U_22
 _atom_site_aniso_U_33
 _atom_site_aniso_U_23
 _atom_site_aniso_U_13
 _atom_site_aniso_U_12
C1 0.0346(6) 0.0540(8) 0.0336(6) -0.0060(5) -0.0015(5) 0.0003(5)
C2 0.0385(6) 0.0515(8) 0.0374(7) 0.0038(6) -0.0024(5) -0.0036(5)
C3 0.0526(8) 0.0681(10) 0.0528(9) 0.0171(7) -0.0026(7) -0.0089(7)
C4 0.0579(10) 0.1098(16) 0.0477(9) 0.0193(9) 0.0082(7) -0.0154(9)
C5 0.0496(9) 0.1220(17) 0.0390(8) -0.0058(9) 0.0103(6) -0.0036(9)
C6 0.0399(7) 0.0807(11) 0.0401(7) -0.0135(7) 0.0011(6) 0.0048(7)
C7 0.0534(9) 0.0882(13) 0.0655(10) -0.0350(9) 0.0050(8) 0.0117(9)
C8 0.0656(10) 0.0566(10) 0.0889(13) -0.0297(9) 0.0007(9) 0.0119(8)
C9 0.0573(9) 0.0452(8) 0.0642(10) -0.0112(7) 0.0000(7) 0.0010(6)
C10 0.0402(7) 0.0415(7) 0.0405(7) -0.0072(5) -0.0010(5) 0.0007(5)
C11 0.0427(7) 0.0396(7) 0.0398(7) -0.0034(5) 0.0032(5) -0.0054(5)
C12 0.0417(7) 0.0391(7) 0.0472(8) 0.0003(5) -0.0025(5) -0.0015(5)
C13 0.0419(7) 0.0548(8) 0.0531(8) -0.0075(6) 0.0088(6) 0.0077(6)
C14 0.0617(9) 0.0567(9) 0.0543(9) -0.0173(7) 0.0123(7) 0.0023(7)
C15 0.0645(10) 0.0766(11) 0.0473(8) -0.0091(7) 0.0052(7) -0.0007(8)
N1 0.0392(5) 0.0393(6) 0.0420(6) -0.0048(4) 0.0053(4) 0.0012(4)
O1 0.0735(7) 0.0485(6) 0.0587(6) -0.0011(5) 0.0226(5) -0.0140(5)
O2 0.0736(7) 0.0387(6) 0.0785(8) 0.0000(5) 0.0082(6) 0.0030(5)
O3 0.1007(10) 0.0816(9) 0.0572(7) 0.0039(6) 0.0315(7) -0.0023(7)
 
_geom_special_details
;
 All esds (except the esd in the dihedral angle between two l.s. planes)
 are estimated using the full covariance matrix.  The cell esds are taken
 into account individually in the estimation of esds in distances, angles
 and torsion angles; correlations between esds in cell parameters are only
 used when they are defined by crystal symmetry.  An approximate (isotropic)
 treatment of cell esds is used for estimating esds involving l.s. planes.
;
 
loop_
 _geom_bond_atom_site_label_1
 _geom_bond_atom_site_label_2
 _geom_bond_distance
 _geom_bond_site_symmetry_2
 _geom_bond_publ_flag
C1 C2 1.4072(19) . ?
C1 C10 1.4105(19) . ?
C1 C6 1.4236(18) . ?
C2 C3 1.376(2) . ?
C2 C12 1.4719(19) . ?
C3 C4 1.392(2) . ?
C3 H3 0.9300 . ?
C4 C5 1.361(3) . ?
C4 H4 0.9300 . ?
C5 C6 1.416(2) . ?
C5 H5 0.9300 . ?
C6 C7 1.411(3) . ?
C7 C8 1.353(3) . ?
C7 H7 0.9300 . ?
C8 C9 1.408(2) . ?
C8 H8 0.9300 . ?
C9 C10 1.3754(19) . ?
C9 H9 0.9300 . ?
C10 C11 1.4709(18) . ?
C11 O1 1.2224(15) . ?
C11 N1 1.3901(17) . ?
C12 O2 1.2178(17) . ?
C12 N1 1.3997(17) . ?
C13 N1 1.4766(16) . ?
C13 C14 1.520(2) . ?
C13 H13A 0.9700 . ?
C13 H13B 0.9700 . ?
C14 C15 1.502(2) . ?
C14 H14A 0.9700 . ?
C14 H14B 0.9700 . ?
C15 O3 1.419(2) . ?
C15 H15A 0.9700 . ?
C15 H15B 0.9700 . ?
O3 H3A 0.8200 . ?
 
loop_
 _geom_angle_atom_site_label_1
 _geom_angle_atom_site_label_2
 _geom_angle_atom_site_label_3
 _geom_angle
 _geom_angle_site_symmetry_1
 _geom_angle_site_symmetry_3
 _geom_angle_publ_flag
C2 C1 C10 120.96(12) . . ?
C2 C1 C6 119.43(13) . . ?
C10 C1 C6 119.61(13) . . ?
C3 C2 C1 120.24(14) . . ?
C3 C2 C12 119.84(14) . . ?
C1 C2 C12 119.92(12) . . ?
C2 C3 C4 120.58(16) . . ?
C2 C3 H3 119.7 . . ?
C4 C3 H3 119.7 . . ?
C5 C4 C3 120.45(15) . . ?
C5 C4 H4 119.8 . . ?
C3 C4 H4 119.8 . . ?
C4 C5 C6 121.17(15) . . ?
C4 C5 H5 119.4 . . ?
C6 C5 H5 119.4 . . ?
C7 C6 C5 123.80(15) . . ?
C7 C6 C1 118.08(15) . . ?
C5 C6 C1 118.11(16) . . ?
C8 C7 C6 121.35(14) . . ?
C8 C7 H7 119.3 . . ?
C6 C7 H7 119.3 . . ?
C7 C8 C9 120.86(16) . . ?
C7 C8 H8 119.6 . . ?
C9 C8 H8 119.6 . . ?
C10 C9 C8 119.75(16) . . ?
C10 C9 H9 120.1 . . ?
C8 C9 H9 120.1 . . ?
C9 C10 C1 120.35(13) . . ?
C9 C10 C11 119.84(13) . . ?
C1 C10 C11 119.81(12) . . ?
O1 C11 N1 120.15(12) . . ?
O1 C11 C10 122.35(12) . . ?
N1 C11 C10 117.50(11) . . ?
O2 C12 N1 119.74(13) . . ?
O2 C12 C2 123.05(13) . . ?
N1 C12 C2 117.21(11) . . ?
N1 C13 C14 113.55(11) . . ?
N1 C13 H13A 108.9 . . ?
C14 C13 H13A 108.9 . . ?
N1 C13 H13B 108.9 . . ?
C14 C13 H13B 108.9 . . ?
H13A C13 H13B 107.7 . . ?
C15 C14 C13 115.15(13) . . ?
C15 C14 H14A 108.5 . . ?
C13 C14 H14A 108.5 . . ?
C15 C14 H14B 108.5 . . ?
C13 C14 H14B 108.5 . . ?
H14A C14 H14B 107.5 . . ?
O3 C15 C14 113.56(14) . . ?
O3 C15 H15A 108.9 . . ?
C14 C15 H15A 108.9 . . ?
O3 C15 H15B 108.9 . . ?
C14 C15 H15B 108.9 . . ?
H15A C15 H15B 107.7 . . ?
C11 N1 C12 124.59(11) . . ?
C11 N1 C13 118.17(11) . . ?
C12 N1 C13 117.23(11) . . ?
C15 O3 H3A 109.5 . . ?
 
loop_
 _geom_hbond_atom_site_label_D 
 _geom_hbond_atom_site_label_H 
 _geom_hbond_atom_site_label_A 
 _geom_hbond_distance_DH 
 _geom_hbond_distance_HA 
 _geom_hbond_distance_DA 
 _geom_hbond_angle_DHA 
 _geom_hbond_site_symmetry_A 
O3 H3A O1  0.82 2.10 2.8500(16) 152.7 .
 
_refine_diff_density_max    0.159
_refine_diff_density_min   -0.174
_refine_diff_density_rms    0.040

_shelxl_version_number 2014-3

_shelx_res_file
;
TITL P21yc in P2(1)/c
CELL  0.71073   4.8045  25.7786   9.8034   90.000   95.380   90.000
ZERR     4.00   0.0002   0.0010   0.0004    0.000    0.002    0.000
LATT   1
SYMM  - X, 1/2 + Y, 1/2 - Z
SFAC  C    H    N    O
UNIT  60 52 4 12
MERG   2
OMIT    -3.00  56.00
OMIT  0   2   1
HTAB O3 O1
FMAP   2
PLAN    5
SIZE     0.150   0.200   0.250
ACTA
HTAB    2.00000
BOND   $H
L.S.  10
TEMP    23.00
WGHT    0.080400    0.127500
FVAR       0.33290
C1    1   -0.086261    0.644051    0.840373    11.00000    0.03457    0.05401 =
         0.03363   -0.00602   -0.00152    0.00032
C2    1   -0.045387    0.590096    0.833378    11.00000    0.03845    0.05147 =
         0.03739    0.00382   -0.00241   -0.00364
C3    1   -0.178568    0.557296    0.916876    11.00000    0.05255    0.06807 =
         0.05278    0.01714   -0.00261   -0.00885
AFIX  43
H3    2   -0.153395    0.521643    0.910331    11.00000   -1.20000
AFIX   0
C4    1   -0.350723    0.577006    1.011101    11.00000    0.05793    0.10981 =
         0.04771    0.01933    0.00817   -0.01537
AFIX  43
H4    2   -0.437193    0.554468    1.068012    11.00000   -1.20000
AFIX   0
C5    1   -0.393325    0.629038    1.020488    11.00000    0.04958    0.12201 =
         0.03900   -0.00575    0.01028   -0.00359
AFIX  43
H5    2   -0.509052    0.641591    1.083883    11.00000   -1.20000
AFIX   0
C6    1   -0.264537    0.664396    0.935425    11.00000    0.03993    0.08074 =
         0.04012   -0.01352    0.00110    0.00476
C7    1   -0.303029    0.718619    0.939249    11.00000    0.05338    0.08824 =
         0.06550   -0.03495    0.00502    0.01174
AFIX  43
H7    2   -0.419216    0.732622    1.000467    11.00000   -1.20000
AFIX   0
C8    1   -0.174369    0.750660    0.855680    11.00000    0.06558    0.05656 =
         0.08893   -0.02965    0.00073    0.01188
AFIX  43
H8    2   -0.203064    0.786265    0.860487    11.00000   -1.20000
AFIX   0
C9    1    0.002424    0.730796    0.761517    11.00000    0.05728    0.04522 =
         0.06420   -0.01121   -0.00001    0.00103
AFIX  43
H9    2    0.089834    0.753184    0.704585    11.00000   -1.20000
AFIX   0
C10   1    0.045353    0.678164    0.754055    11.00000    0.04024    0.04146 =
         0.04045   -0.00722   -0.00103    0.00073
C11   1    0.228738    0.657314    0.655251    11.00000    0.04267    0.03964 =
         0.03976   -0.00343    0.00323   -0.00545
C12   1    0.140451    0.568642    0.736378    11.00000    0.04174    0.03908 =
         0.04717    0.00028   -0.00250   -0.00148
C13   1    0.454366    0.582406    0.555909    11.00000    0.04190    0.05479 =
         0.05307   -0.00746    0.00882    0.00771
AFIX  23
H13A  2    0.557881    0.553652    0.599680    11.00000   -1.20000
H13B  2    0.588270    0.608880    0.536075    11.00000   -1.20000
AFIX   0
C14   1    0.302977    0.563645    0.421881    11.00000    0.06169    0.05666 =
         0.05427   -0.01731    0.01229    0.00234
AFIX  23
H14A  2    0.439728    0.549035    0.366018    11.00000   -1.20000
H14B  2    0.176196    0.535982    0.441982    11.00000   -1.20000
AFIX   0
C15   1    0.139428    0.604447    0.339676    11.00000    0.06449    0.07663 =
         0.04726   -0.00914    0.00522   -0.00073
AFIX  23
H15A  2    0.051054    0.588728    0.256734    11.00000   -1.20000
H15B  2   -0.007519    0.617231    0.392247    11.00000   -1.20000
AFIX   0
N1    3    0.265702    0.603857    0.652265    11.00000    0.03916    0.03930 =
         0.04202   -0.00480    0.00533    0.00123
O1    4    0.345258    0.685172    0.577234    11.00000    0.07347    0.04848 =
         0.05873   -0.00113    0.02265   -0.01398
O2    4    0.187525    0.522429    0.726855    11.00000    0.07356    0.03870 =
         0.07847    0.00004    0.00819    0.00303
O3    4    0.304579    0.646989    0.303260    11.00000    0.10074    0.08163 =
         0.05717    0.00389    0.03149   -0.00234
AFIX 147
H3A   2    0.328247    0.667087    0.368145    11.00000   -1.50000
AFIX   0
HKLF    4  1.0  1.00  0.00  0.00  0.00  1.00  0.00  0.00  0.00  1.00

REM  P21yc in P2(1)/c
REM R1 =  0.0404 for    1911 Fo > 4sig(Fo)  and  0.0526 for all    2444 data
REM    173 parameters refined using      0 restraints

END

WGHT      0.0675      0.1595

REM Instructions for potential hydrogen bonds
HTAB O3 O1

REM Highest difference peak  0.159,  deepest hole -0.174,  1-sigma level  0.040
Q1    1   0.1483  0.6706  0.7304  11.00000  0.05    0.16
Q2    1   0.0203  0.5794  0.7767  11.00000  0.05    0.15
Q3    1  -0.1027  0.5039  0.8952  11.00000  0.05    0.15
Q4    1  -0.1832  0.6528  0.8857  11.00000  0.05    0.14
Q5    1   0.1921  0.5102  0.7207  11.00000  0.05    0.14
;
_shelx_res_checksum   79267

_shelx_hkl_file
;
   1   0   0  150.91    2.78
  -1   0   0  147.28    2.86
  -3   0   0   18.24    0.56
  -4   0   0    0.65    0.20
  -5   0   0    0.00    0.21
   5   0   0    0.08    0.13
   0  -1   0    0.00    0.00
   0  -1   0    0.00    0.00
   0   1   0    0.00    0.00
   0   1   0    0.00    0.00
   1  -1   0   38.89    0.76
  -1  -1   0   38.75    0.76
  -1   1   0   38.06    0.76
   1   1   0   38.42    0.75
  -2  -1   0    6.47    0.25
  -3  -1   0    4.10    0.28
  -3   1   0    4.24    0.28
  -4  -1   0    0.36    0.19
  -4   1   0    0.02    0.17
  -5  -1   0    0.03    0.21
  -5   1   0    0.11    0.21
   5   1   0    0.32    0.16
   1  -2   0   12.31    0.30
   1  -2   0   11.92    0.24
  -1  -2   0   12.66    0.31
   1   2   0   12.34    0.30
   1   2   0   11.78    0.28
   2  -2   0    3.64    0.14
  -2  -2   0    3.86    0.20
  -2   2   0    3.45    0.20
  -3  -2   0   82.60    1.68
  -3   2   0   80.67    1.68
  -4  -2   0    5.46    0.37
  -4   2   0    4.99    0.35
   4   2   0    5.34    0.29
  -5  -2   0   -0.14    0.21
  -5   2   0   -0.41    0.18
   5   2   0    0.14    0.14
   0  -3   0   -0.28    0.01
   0   3   0   -0.17    0.02
   0   3   0   -0.28    0.01
   1  -3   0  461.34    8.34
   1  -3   0  443.67    7.12
   1   3   0  456.55    8.35
  -1   3   0  449.35    8.41
   1   3   0  438.27    8.83
  -2  -3   0   20.01    0.50
   2  -3   0   20.45    0.41
  -2   3   0   19.72    0.51
   2   3   0   20.13    0.49
  -3  -3   0   57.29    1.25
   3  -3   0   58.09    1.03
  -3   3   0   57.38    1.26
   3   3   0   57.48    1.26
  -4  -3   0    7.56    0.40
   4   3   0    7.15    0.33
  -4   3   0    7.94    0.40
  -5  -3   0   -0.35    0.17
  -5   3   0   -0.06    0.18
   5   3   0    0.08    0.14
   0   4   0  445.56    8.15
  -1  -4   0   71.15    1.43
   1  -4   0   73.00    1.32
   1  -4   0   72.18    1.34
   1  -4   0   72.40    1.14
  -1   4   0   70.04    1.31
   1   4   0   69.89    1.49
  -1   4   0   72.91    1.31
  -1   4   0   73.35    1.14
   1   4   0   73.04    1.32
   1   4   0   73.51    1.31
   2  -4   0    0.17    0.02
   2  -4   0    0.13    0.06
  -2   4   0    0.14    0.09
   2   4   0    0.21    0.07
   3  -4   0   23.24    0.50
  -3  -4   0   22.57    0.63
  -3   4   0   21.79    0.63
   3   4   0   21.82    0.58
  -4  -4   0   -0.07    0.16
  -4   4   0   -0.02    0.15
   4   4   0   -0.07    0.12
  -5   4   0    2.44    0.30
   5   4   0    2.86    0.25
   1  -5   0   87.39    1.61
  -1  -5   0   85.05    1.57
  -1  -5   0   83.95    1.73
  -1  -5   0   86.55    1.56
   1  -5   0   85.55    1.35
   1  -5   0   88.09    1.58
  -1   5   0   85.10    1.62
   1   5   0   85.83    1.57
   1   5   0   87.31    1.59
  -1   5   0   84.44    1.40
   2  -5   0   14.06    0.29
   2  -5   0   14.12    0.31
   2  -5   0   13.43    0.28
  -2   5   0   12.71    0.39
   2   5   0   13.73    0.27
   2   5   0   13.54    0.36
   3  -5   0   18.49    0.37
   3  -5   0   18.42    0.37
   3   5   0   18.41    0.50
  -3   5   0   17.81    0.55
   4  -5   0    0.14    0.04
   4  -5   0    0.13    0.04
   4   5   0    0.02    0.12
  -4   5   0   -0.05    0.16
   5  -5   0    0.36    0.06
  -5   5   0    0.44    0.22
   5   5   0    0.43    0.17
   0  -6   0  180.75    3.54
   0  -6   0  181.02    3.49
   0   6   0  182.63    3.52
   0   6   0  189.08    3.52
   0   6   0  177.91    3.50
   1  -6   0   12.25    0.24
  -1  -6   0   12.39    0.29
   1  -6   0   12.65    0.28
   1  -6   0   12.67    0.30
  -1   6   0   12.15    0.24
   1   6   0   12.34    0.27
   1   6   0   12.66    0.29
   2  -6   0   50.54    0.96
   2  -6   0   49.34    0.94
   2  -6   0   50.66    0.86
  -2   6   0   49.31    1.06
   2   6   0   50.12    0.94
   2   6   0   49.49    1.05
   2   6   0   51.20    0.93
   3  -6   0    6.71    0.18
   3  -6   0    6.61    0.19
   3   6   0    6.64    0.27
  -3   6   0    6.35    0.33
   4  -6   0    0.94    0.09
   4  -6   0    1.11    0.10
   4   6   0    0.71    0.16
  -4   6   0    0.92    0.21
   5  -6   0   -0.02    0.06
  -5   6   0   -0.03    0.18
   5   6   0    0.13    0.14
   1  -7   0  125.25    2.27
  -1  -7   0  120.70    2.45
   1  -7   0  122.64    1.94
   1  -7   0  122.39    2.31
  -1   7   0  123.16    2.07
   1   7   0  123.39    2.31
  -1   7   0  122.81    2.27
   1   7   0  121.93    2.28
   2  -7   0    4.12    0.16
   2  -7   0    4.12    0.14
   2  -7   0    4.35    0.16
   2   7   0    4.20    0.18
   2   7   0    4.25    0.15
  -2   7   0    4.60    0.24
   2   7   0    4.27    0.14
   3  -7   0   18.24    0.39
   3  -7   0   18.07    0.41
   3   7   0   17.97    0.37
  -3   7   0   17.80    0.57
   3   7   0   17.64    0.38
   3   7   0   17.52    0.49
   4  -7   0    1.44    0.11
   4  -7   0    1.23    0.12
   4   7   0    1.44    0.18
   4   7   0    1.19    0.09
  -4   7   0    1.44    0.22
   4   7   0    1.36    0.09
   5  -7   0    0.46    0.08
  -5   7   0    0.45    0.23
   5   7   0    0.42    0.07
   5   7   0    0.63    0.17
   0  -8   0   64.50    1.22
   0   8   0   64.05    1.24
   1  -8   0   42.94    0.84
  -1  -8   0   40.29    0.82
   1  -8   0   43.00    0.86
   1  -8   0   43.52    0.85
  -1  -8   0   42.88    0.88
  -1   8   0   43.63    0.85
  -1   8   0   43.60    0.71
   1   8   0   42.94    0.86
   1   8   0   43.94    0.84
   2  -8   0    0.81    0.08
   2  -8   0    0.97    0.09
   2  -8   0    0.84    0.09
  -2   8   0    0.85    0.14
   2   8   0    0.88    0.08
   2   8   0    0.91    0.10
   2   8   0    1.00    0.10
   3  -8   0    8.97    0.27
   3  -8   0    8.54    0.24
   3   8   0    8.22    0.31
   3   8   0    8.86    0.23
   3   8   0    8.33    0.24
  -3   8   0    8.42    0.40
   4  -8   0    0.31    0.07
  -4   8   0    0.35    0.18
   4   8   0    0.24    0.13
   4   8   0    0.29    0.06
   4   8   0    0.30    0.07
   5  -8   0    0.55    0.09
   5   8   0    0.65    0.09
  -5   8   0    0.72    0.22
   5   8   0    0.37    0.16
   1  -9   0   12.92    0.32
  -1  -9   0   12.56    0.30
   1  -9   0   13.25    0.34
   1  -9   0   13.04    0.32
   1   9   0   12.78    0.31
  -1   9   0   12.95    0.33
  -1   9   0   12.90    0.26
   1   9   0   12.62    0.33
   2  -9   0   -0.03    0.05
   2  -9   0    0.09    0.06
  -2  -9   0   -0.01    0.07
   2  -9   0   -0.05    0.05
  -2   9   0   -0.05    0.05
  -2   9   0   -0.12    0.10
   2   9   0    0.05    0.04
   2   9   0   -0.06    0.04
   3  -9   0   33.97    0.71
   3  -9   0   35.25    0.74
   3   9   0   34.19    0.71
   3   9   0   32.82    0.79
  -3   9   0   33.42    0.87
   3   9   0   35.66    0.70
   4  -9   0    0.12    0.07
   4   9   0    0.21    0.07
   4   9   0    0.20    0.12
  -4   9   0   -0.01    0.17
   5  -9   0    0.00    0.08
   5   9   0   -0.05    0.14
  -5   9   0   -0.15    0.18
   5   9   0   -0.01    0.07
   0 -10   0   99.13    1.83
   0  10   0   96.43    1.86
  -1 -10   0    3.81    0.15
   1 -10   0    3.67    0.16
   1 -10   0    4.04    0.17
  -1  10   0    3.78    0.18
   1  10   0    3.57    0.17
  -1  10   0    3.90    0.12
  -2 -10   0   24.90    0.58
   2 -10   0   25.55    0.48
   2 -10   0   25.40    0.58
   2 -10   0   24.65    0.55
   2  10   0   24.98    0.54
   2  10   0   24.93    0.56
  -2  10   0   24.78    0.65
  -2  10   0   25.03    0.50
  -2  10   0   24.54    0.49
   3 -10   0    9.91    0.29
   3 -10   0   10.54    0.32
   3  10   0    9.80    0.33
   3  10   0   10.01    0.30
   3  10   0   10.27    0.28
  -3  10   0   10.58    0.45
   4 -10   0    0.08    0.07
   4  10   0    0.07    0.12
  -4  10   0   -0.16    0.16
   4  10   0    0.05    0.07
   5 -10   0    0.21    0.09
   5  10   0    0.24    0.09
  -5  10   0    0.17    0.20
   5  10   0    0.18    0.15
  -1 -11   0   35.14    0.74
   1 -11   0   36.87    0.76
  -1  11   0   36.18    0.62
   1  11   0   36.08    0.78
  -1  11   0   36.54    0.77
  -2 -11   0   43.55    0.93
   2 -11   0   43.40    0.76
   2 -11   0   42.83    0.89
   2 -11   0   43.62    0.92
  -2  11   0   42.91    0.77
  -2  11   0   43.58    1.00
   2  11   0   44.13    0.88
  -2  11   0   42.68    0.84
   2  11   0   42.83    0.91
   3 -11   0    6.46    0.26
   3 -11   0    6.25    0.23
   3  11   0    6.03    0.21
   3  11   0    5.66    0.23
  -3  11   0    6.17    0.35
   4 -11   0    0.92    0.12
   4  11   0    0.79    0.11
   4  11   0    1.04    0.16
  -4  11   0    0.73    0.23
   5 -11   0    0.07    0.09
   5 -11   0    0.12    0.09
   5  11   0   -0.03    0.14
  -5  11   0   -0.04    0.18
   5  11   0    0.07    0.09
   0 -12   0  262.19    5.08
   0  12   0  255.08    4.93
  -1 -12   0   20.87    0.48
   1 -12   0   21.51    0.51
  -1  12   0   21.17    0.40
  -1  12   0   21.07    0.51
   1  12   0   20.80    0.53
   2 -12   0    0.17    0.07
  -2 -12   0    0.22    0.05
   2 -12   0    0.25    0.08
   2  12   0    0.21    0.06
  -2  12   0    0.16    0.06
   2  12   0    0.12    0.07
  -2  12   0    0.23    0.15
   3 -12   0   -0.02    0.07
   3 -12   0   -0.02    0.07
   3  12   0   -0.01    0.07
   3  12   0   -0.02    0.06
  -3  12   0    0.01    0.15
   4 -12   0    3.94    0.21
   4  12   0    4.09    0.22
  -4  12   0    3.53    0.36
   5 -12   0    0.26    0.10
   5 -12   0    0.06    0.10
  -5  12   0    0.07    0.21
   5  12   0   -0.09    0.15
   5  12   0    0.09    0.10
   1 -13   0   82.10    1.60
  -1 -13   0   81.15    1.57
  -1  13   0   81.86    1.61
  -1  13   0   82.05    1.32
   1  13   0   83.56    1.64
   2 -13   0    1.51    0.14
   2 -13   0    1.35    0.13
  -2 -13   0    1.53    0.10
  -2  13   0    1.70    0.11
   2  13   0    1.42    0.14
  -2  13   0    1.59    0.20
   3 -13   0    2.49    0.17
   3 -13   0    2.09    0.16
   3  13   0    2.18    0.17
  -3  13   0    2.04    0.24
   4 -13   0    0.62    0.12
   4 -13   0    0.84    0.13
   4  13   0    0.71    0.13
  -4  13   0    0.74    0.24
   5 -13   0    0.13    0.10
   5  13   0    0.10    0.11
  -5  13   0    0.31    0.21
   0 -14   0   -0.06    0.07
   0  14   0   -0.02    0.08
   1 -14   0   18.57    0.48
  -1 -14   0   18.21    0.46
  -1  14   0   18.26    0.36
  -1  14   0   19.22    0.49
   1  14   0   18.06    0.50
   2 -14   0   -0.02    0.09
   2 -14   0    0.20    0.08
  -2 -14   0    0.23    0.06
  -2  14   0    0.29    0.07
  -2  14   0    0.41    0.17
   2  14   0    0.24    0.09
  -2  14   0    0.30    0.07
   3 -14   0    0.72    0.12
   3 -14   0    0.77    0.12
  -3  14   0    0.67    0.20
   3  14   0    0.73    0.12
   4 -14   0    3.34    0.22
   4 -14   0    2.88    0.22
  -4  14   0    2.29    0.32
   4  14   0    2.91    0.24
   5 -14   0    1.37    0.16
   5  14   0    1.29    0.17
  -5  14   0    1.30    0.30
   0 -15   0   -0.03    0.06
   0  15   0   -0.09    0.07
   1 -15   0    2.00    0.16
  -1 -15   0    1.80    0.14
  -1  15   0    1.84    0.17
   1  15   0    1.78    0.17
  -1  15   0    1.63    0.10
   2 -15   0    7.65    0.28
  -2 -15   0    6.32    0.21
   2  15   0    7.49    0.30
  -2  15   0    7.79    0.26
  -2  15   0    7.33    0.22
   3 -15   0    9.07    0.32
   3 -15   0    9.02    0.33
  -3  15   0    9.31    0.45
   3  15   0    9.02    0.35
   4 -15   0   43.55    0.96
   4 -15   0   43.06    0.97
   4  15   0   42.69    0.99
  -4  15   0   43.03    1.16
   5 -15   0    0.27    0.12
  -5  15   0    0.45    0.23
   5  15   0    0.26    0.14
   0 -16   0    7.47    0.27
   0  16   0    7.54    0.31
  -1 -16   0    5.16    0.23
   1 -16   0    4.86    0.23
  -1  16   0    4.95    0.16
  -1  16   0    4.91    0.25
   1  16   0    4.89    0.26
   2 -16   0    1.84    0.17
   2  16   0    1.84    0.19
  -2  16   0    1.77    0.12
  -2  16   0    1.77    0.16
   3  16   0    0.15    0.11
  -3  16   0    0.04    0.19
   4 -16   0   15.33    0.49
   4  16   0   15.33    0.50
  -4  16   0   16.66    0.67
   5 -16   0    0.12    0.11
   5  16   0    0.10    0.14
  -5  16   0    0.31    0.23
   0 -17   0    0.19    0.08
   0  17   0    0.13    0.09
  -1 -17   0    0.65    0.10
   1 -17   0    0.56    0.11
  -1  17   0    0.50    0.07
  -1  17   0    0.79    0.13
   1  17   0    0.41    0.11
   2 -17   0    1.48    0.16
  -2  17   0    1.68    0.15
   2  17   0    1.38    0.17
  -2  17   0    1.59    0.12
   3 -17   0    0.93    0.16
  -3  17   0    1.12    0.25
   3  17   0    1.08    0.16
   4 -17   0    0.93    0.16
  -4  17   0    1.13    0.28
   4  17   0    0.59    0.17
   5 -17   0    0.30    0.13
   5  17   0    0.15    0.15
  -5  17   0    0.12    0.22
   0 -18   0    3.81    0.21
   0  18   0    3.94    0.24
   1 -18   0    0.39    0.11
  -1 -18   0    0.41    0.10
  -1  18   0    0.24    0.11
   1  18   0    0.27    0.12
  -1  18   0    0.40    0.07
   2 -18   0    9.31    0.36
   2  18   0    9.78    0.38
  -2  18   0    9.43    0.27
  -2  18   0    9.28    0.35
   3 -18   0    1.00    0.16
   3  18   0    1.22    0.18
  -3  18   0    1.43    0.27
   4 -18   0    4.10    0.27
  -4  18   0    4.40    0.42
   4  18   0    4.05    0.30
   0 -19   0   -0.02    0.08
   0  19   0    0.01    0.10
   1 -19   0    0.83    0.14
  -1 -19   0    0.84    0.13
   1  19   0    0.82    0.15
  -1  19   0    1.00    0.09
  -1  19   0    0.72    0.14
   2 -19   0   29.57    0.76
  -2  19   0   31.33    0.75
   2  19   0   31.37    0.81
  -2  19   0   30.11    0.60
   3 -19   0   12.34    0.44
   3  19   0   12.82    0.48
  -3  19   0   12.66    0.58
   4 -19   0    0.35    0.13
  -4  19   0    0.12    0.22
   4  19   0    0.01    0.13
   0 -20   0    1.44    0.16
   0  20   0    1.56    0.18
   1 -20   0   -0.14    0.10
  -1 -20   0    0.00    0.09
  -1  20   0   -0.07    0.12
   1  20   0    0.04    0.11
  -1  20   0    0.13    0.07
   2 -20   0   10.08    0.39
   2  20   0   11.91    0.46
  -2  20   0   10.72    0.30
   3 -20   0    2.23    0.23
  -3  20   0    2.22    0.31
   3  20   0    1.86    0.23
   4 -20   0    0.21    0.13
  -4  20   0    0.44    0.23
   4  20   0    0.17    0.14
   0 -21   0    0.01    0.10
   0  21   0   -0.01    0.12
  -1 -21   0    8.43    0.33
   1 -21   0    7.19    0.35
   1  21   0    7.96    0.38
  -1  21   0    7.38    0.37
  -1  21   0    7.86    0.23
   2 -21   0    0.24    0.13
   2  21   0    0.49    0.16
  -2  21   0    0.47    0.11
   3 -21   0    7.77    0.36
   3  21   0    7.78    0.41
  -3  21   0    8.20    0.50
   4 -21   0    0.89    0.16
  -4  21   0    0.83    0.26
   4  21   0    0.51    0.17
   0 -22   0    2.89    0.24
   0  22   0    3.09    0.28
   1 -22   0   -0.11    0.11
  -1 -22   0    0.10    0.11
  -1  22   0   -0.03    0.12
  -1  22   0    0.04    0.08
   1  22   0    0.07    0.13
   2 -22   0   43.61    1.05
   2  22   0   45.14    1.11
  -2  22   0   45.87    0.84
   3 -22   0   17.83    0.57
   3  22   0   17.22    0.61
  -3  22   0   18.30    0.71
   4 -22   0    0.12    0.13
   4  22   0   -0.06    0.15
  -4  22   0    0.32    0.23
   0 -23   0    0.06    0.13
   0  23   0   -0.04    0.14
   1 -23   0    4.46    0.30
  -1 -23   0    5.00    0.28
   1  23   0    4.65    0.33
  -1  23   0    4.17    0.19
  -1  23   0    4.26    0.32
   2 -23   0    8.12    0.38
   2  23   0    7.95    0.41
  -2  23   0    7.26    0.26
   3 -23   0    1.77    0.21
  -3  23   0    1.82    0.32
   3  23   0    1.26    0.22
   4 -23   0    1.11    0.18
   4  23   0    1.19    0.22
  -4  23   0    1.85    0.31
   0 -24   0   41.43    0.99
   0  24   0   42.17    1.07
   1 -24   0    5.00    0.30
  -1 -24   0    5.52    0.31
  -1  24   0    5.24    0.35
   1  24   0    5.31    0.36
  -1  24   0    5.08    0.20
   2 -24   0    7.53    0.37
   2  24   0    7.26    0.40
  -2  24   0    6.96    0.25
   3 -24   0    1.05    0.18
  -3  24   0    1.03    0.29
   3  24   0    0.89    0.20
   0  25   0    0.90    0.20
  -1 -25   0   27.13    0.73
   1 -25   0   26.83    0.76
  -1  25   0   26.33    0.55
  -1  25   0   29.66    0.81
   1  25   0   26.95    0.82
   2 -25   0    0.77    0.17
   2  25   0    0.39    0.17
  -2  25   0    0.37    0.10
   3 -25   0    0.81    0.18
  -3  25   0    0.66    0.26
   3  25   0    0.35    0.17
   0 -26   0    2.00    0.22
   0  26   0    1.86    0.25
   1 -26   0    1.85    0.22
  -1  26   0    3.30    0.31
   1  26   0    3.02    0.30
   2 -26   0    0.84    0.18
   2  26   0    0.91    0.20
   3 -26   0    1.27    0.20
  -3  26   0    1.20    0.31
   3  26   0    0.89    0.21
   0 -27   0    0.00    0.14
   0  27   0    0.12    0.17
   1 -27   0    1.88    0.23
  -1  27   0    2.12    0.26
   1  27   0    2.21    0.27
   2 -27   0    0.34    0.16
   2  27   0    0.32    0.18
   3 -27   0    0.00    0.14
  -3  27   0    0.21    0.26
   3  27   0    0.00    0.16
   0 -28   0    0.98    0.19
   0  28   0    0.93    0.22
   1 -28   0    0.20    0.15
   1  28   0    0.08    0.17
   2 -28   0    0.10    0.14
   2  28   0    0.15    0.17
   0 -29   0   -0.10    0.14
   0  29   0    0.39    0.20
   1 -29   0    0.50    0.17
   1  29   0    0.64    0.21
   2 -29   0    1.23    0.22
   2  29   0    1.24    0.25
   0 -30   0    0.74    0.20
   0  30   0    0.61    0.23
   1 -30   0    0.23    0.17
   1  30   0    0.58    0.23
   2 -30   0    0.15    0.17
   2  30   0    0.08    0.20
   0 -31   0    0.08    0.16
   0  31   0    0.01    0.19
   1 -31   0    0.13    0.17
   1  31   0    0.10    0.20
   0  32   0    0.84    0.25
  -6   0   1   -0.38    0.24
   6   0  -1    0.05    0.19
  -5   0   1   -0.13    0.19
  -4   0   1   -0.11    0.14
  -3   0   1   -0.02    0.11
   2   0  -1   -0.05    0.04
  -2   0   1   -0.09    0.07
   1   0  -1    0.00    0.03
   1   0  -1   -0.02    0.01
   1   0  -1   -0.01    0.01
  -1   0   1   -0.04    0.03
   1   0  -1   -0.09    0.05
  -1   0   1   -0.08    0.05
   0   0  -1   -0.13    0.01
   0   0  -1   -0.14    0.01
   0   0  -1   -0.10    0.01
   0   0   1   -0.13    0.01
   1   0   1   -0.27    0.06
  -1   0  -1   -0.29    0.06
  -2   0  -1   -0.05    0.08
  -3   0  -1   -0.16    0.12
  -4   0  -1    0.17    0.19
   4   0   1    0.26    0.16
   5   0   1   -0.12    0.14
  -5   0  -1   -0.15    0.19
   6  -1  -1   -0.06    0.17
  -6  -1   1    0.02    0.24
  -6   1   1   -0.51    0.21
   6   1  -1   -0.18    0.17
  -5  -1   1    0.84    0.24
  -5   1   1    1.12    0.26
  -4  -1   1    1.44    0.22
  -4   1   1    1.32    0.21
  -3  -1   1   18.17    0.54
  -3   1   1   18.28    0.54
   2  -1  -1    0.77    0.08
  -2  -1   1    0.82    0.11
  -2   1   1    0.74    0.11
   2   1  -1    0.86    0.08
   1  -1  -1    3.12    0.08
   1  -1  -1    3.20    0.08
  -1  -1   1    3.36    0.14
   1  -1  -1    3.06    0.14
   1  -1  -1    3.00    0.10
   1   1  -1    3.01    0.08
   1   1  -1    3.10    0.08
   1  -1   1  109.04    1.98
   1  -1   1  106.09    1.96
  -1  -1  -1  106.75    1.98
  -1   1  -1  106.84    1.97
   1   1   1  107.69    2.28
   1   1   1  109.11    1.98
  -2   1  -1   17.63    0.47
  -3  -1  -1    2.57    0.23
  -3   1  -1    2.13    0.22
   3   1   1    2.44    0.19
  -4  -1  -1   26.67    0.78
   4   1   1   26.15    0.74
  -4   1  -1   26.81    0.78
  -5  -1  -1    0.97    0.26
   5  -1   1    1.26    0.22
   5   1   1    0.98    0.20
  -5   1  -1    0.86    0.24
  -5  -2   1    0.40    0.23
  -5   2   1    0.64    0.23
   5   2  -1    1.35    0.20
  -4  -2   1    0.80    0.19
  -4   2   1    0.92    0.19
  -3  -2   1    1.51    0.19
  -3   2   1    0.91    0.17
  -2  -2   1  105.59    2.04
   2  -2  -1  109.43    1.73
  -2   2   1  106.18    2.05
   1  -2  -1  689.97   12.37
  -1  -2   1  667.12   12.29
   1  -2  -1  657.80   10.51
  -1   2   1  673.18   12.41
   1   2  -1  674.57   12.31
   0  -2  -1   -0.03    0.01
  -2  -2  -1   46.25    0.97
  -2   2  -1   45.44    0.96
   2   2   1   45.65    0.99
  -3  -2  -1    0.05    0.12
   3   2   1    0.04    0.09
  -3   2  -1   -0.17    0.10
  -4  -2  -1   16.02    0.58
  -4   2  -1   16.45    0.58
   4   2   1   16.04    0.53
  -5  -2  -1    1.37    0.27
   5  -2   1    1.14    0.21
  -5   2  -1    1.13    0.25
   5   2   1    1.22    0.21
  -5  -3   1    4.01    0.38
   5   3  -1    4.65    0.30
  -5   3   1    4.16    0.36
  -4  -3   1    0.07    0.17
  -4   3   1    0.11    0.15
  -3  -3   1    0.26    0.13
  -3   3   1    0.05    0.13
  -2  -3   1   50.92    1.05
   2  -3  -1   50.76    0.91
   2  -3  -1   50.54    0.87
  -2   3   1   49.86    1.06
   1  -3  -1   57.75    1.08
  -1  -3   1   57.12    1.04
  -1  -3   1   58.16    1.10
   1  -3  -1   57.87    1.07
  -1   3   1   58.06    0.94
   1   3  -1   57.58    1.05
  -1   3   1   58.42    1.12
  -1   3   1   57.66    1.05
   1   3  -1   58.68    1.06
   1   3  -1   58.11    1.07
   1   3  -1   57.59    1.10
   0  -3   1    0.37    0.05
   0   3  -1    0.36    0.04
   0   3   1    0.46    0.04
   1  -3   1   56.76    1.03
  -1  -3  -1   55.58    1.13
   1  -3   1   55.71    1.07
   1  -3   1   56.62    1.03
   1   3   1   55.31    1.03
  -1   3  -1   55.42    1.00
   1   3   1   55.18    1.13
  -1   3  -1   56.06    1.07
   1   3   1   56.50    1.02
   1   3   1   54.86    1.08
  -2  -3  -1    0.79    0.12
   2   3   1    1.00    0.11
  -2   3  -1    0.70    0.12
  -3  -3  -1    0.21    0.15
  -3   3  -1    0.14    0.13
   3   3   1    0.05    0.09
  -4  -3  -1    0.38    0.20
   4   3   1    0.61    0.16
  -4   3  -1    0.44    0.20
   5   3   1    0.05    0.15
  -5   3  -1    0.00    0.21
   5  -4  -1    0.35    0.07
   5   4  -1    0.34    0.15
  -5   4   1    0.26    0.20
  -4  -4   1    1.15    0.21
   4   4  -1    1.10    0.16
  -4   4   1    1.07    0.21
  -3  -4   1   84.21    1.73
   3  -4  -1   85.78    1.53
  -3   4   1   84.58    1.75
   2  -4  -1   81.50    1.46
   2  -4  -1   80.92    1.47
  -2  -4   1   79.58    1.57
   2  -4  -1   80.20    1.32
   2   4  -1   79.77    1.44
  -1  -4   1   10.12    0.21
  -1  -4   1    8.86    0.20
   1  -4  -1   10.17    0.23
   1  -4  -1    9.67    0.23
   1  -4  -1   10.06    0.21
   1   4  -1   10.31    0.22
  -1   4   1   10.16    0.29
   1   4  -1   10.07    0.22
  -1   4   1   10.11    0.21
   1   4  -1    9.99    0.27
   1   4  -1    9.73    0.22
   1   4  -1   10.17    0.23
   0  -4  -1    1.34    0.07
   0  -4   1    1.29    0.07
   0  -4   1    1.34    0.07
   0  -4  -1    1.40    0.08
   0   4  -1    1.47    0.08
   0   4   1    1.35    0.07
   0   4  -1    1.23    0.07
   0   4   1    1.34    0.08
  -1  -4  -1   -0.01    0.02
  -1  -4  -1    0.04    0.02
  -1  -4  -1    0.02    0.05
   1  -4   1    0.08    0.03
   1  -4   1   -0.01    0.08
   1   4   1    0.04    0.06
   1   4   1    0.04    0.03
  -1   4  -1    0.06    0.02
  -1   4  -1    0.00    0.06
   2  -4   1    0.28    0.04
   2  -4   1    0.32    0.04
  -2   4  -1    0.32    0.10
   2   4   1    0.24    0.08
   3  -4   1   11.75    0.32
  -3   4  -1   11.49    0.44
   3   4   1   11.38    0.37
   4   4   1   10.47    0.41
  -4   4  -1   10.42    0.46
   5   4   1    0.06    0.14
  -5   4  -1   -0.06    0.19
   5  -5  -1    4.09    0.15
   5  -5  -1    3.66    0.16
   5   5  -1    3.60    0.28
  -5   5   1    4.40    0.39
  -4  -5   1    5.79    0.36
   4  -5  -1    5.66    0.17
   4  -5  -1    5.57    0.16
   4   5  -1    5.65    0.27
  -4   5   1    5.27    0.34
   3  -5  -1   55.60    1.04
   3  -5  -1   55.68    1.03
  -3  -5   1   55.23    1.21
  -3   5   1   54.15    1.22
   3   5  -1   55.23    1.19
   2  -5  -1  101.80    1.87
   2  -5  -1  102.97    1.64
   2  -5  -1  101.15    1.85
  -2   5   1   99.31    1.96
   2   5  -1  100.16    2.00
  -2   5   1  100.65    1.64
   2   5  -1  101.94    1.83
   2   5  -1  100.54    1.83
   1  -5  -1   52.62    1.00
   1  -5  -1   52.37    0.87
   1  -5  -1   54.35    1.02
   1   5  -1   53.00    1.00
   1   5  -1   53.83    1.01
   1   5  -1   53.82    1.00
  -1   5   1   53.44    0.87
   0  -5   1    4.65    0.14
   0  -5  -1    4.73    0.15
   0  -5  -1    4.60    0.14
   0  -5   1    4.64    0.15
   0   5   1    4.77    0.14
   0   5   1    4.76    0.15
   0   5  -1    4.57    0.15
   0   5  -1    4.76    0.14
   1  -5   1   38.22    0.62
   1  -5   1   38.62    0.74
  -1  -5  -1   33.13    0.70
  -1  -5  -1   38.33    0.80
   1  -5   1   39.03    0.73
   1   5   1   38.19    0.74
  -1   5  -1   37.42    0.77
   1   5   1   39.46    0.73
   2  -5   1   25.53    0.51
   2  -5   1   25.29    0.50
   2  -5   1   24.68    0.48
   2   5   1   24.96    0.49
  -2   5  -1   24.74    0.61
   2   5   1   25.73    0.60
   2   5   1   25.57    0.49
   3  -5   1    2.25    0.11
   3  -5   1    2.23    0.10
   3  -5   1    2.22    0.16
  -3   5  -1    2.07    0.22
   3   5   1    2.39    0.19
   4  -5   1   16.53    0.36
   4  -5   1   17.20    0.38
   4   5   1   16.45    0.53
  -4   5  -1   16.55    0.60
   5  -5   1    2.62    0.13
   5   5   1    2.69    0.25
  -5   5  -1    2.47    0.31
   5  -6  -1    7.36    0.24
   5   6  -1    8.17    0.37
  -5   6   1    7.53    0.45
   4  -6  -1    4.26    0.15
   4  -6  -1    4.37    0.17
   4   6  -1    4.47    0.25
  -4   6   1    4.39    0.34
   4   6  -1    4.38    0.14
   3  -6  -1    2.66    0.11
   3  -6  -1    2.63    0.12
   3   6  -1    2.41    0.10
   3   6  -1    2.27    0.17
  -3   6   1    2.32    0.24
   3   6  -1    2.47    0.10
   2  -6  -1    4.60    0.14
   2  -6  -1    4.58    0.17
   2  -6  -1    4.55    0.16
   2  -6  -1    4.29    0.15
   2   6  -1    4.56    0.13
   2   6  -1    4.54    0.15
  -2   6   1    4.28    0.16
   2   6  -1    4.60    0.16
  -1  -6   1    0.43    0.04
   1  -6  -1    0.38    0.05
  -1   6   1    0.47    0.05
   1   6  -1    0.49    0.05
   1   6  -1    0.47    0.05
   1   6  -1    0.45    0.05
  -1   6   1    0.44    0.05
   0  -6   1  345.23    6.54
   0  -6  -1  348.76    6.53
   0  -6   1  347.15    6.46
   0   6   1  350.18    6.49
   0   6  -1  340.90    6.60
   0   6   1  340.82    6.58
   1  -6   1  122.14    2.21
  -1  -6  -1  118.91    2.32
   1  -6   1  121.40    2.21
   1  -6   1  121.20    1.89
  -1   6  -1  118.34    2.19
   1   6   1  120.70    2.20
   1   6   1  122.35    2.23
  -1   6  -1  101.52    2.15
   2  -6   1   11.84    0.29
   2  -6   1   12.04    0.28
   2  -6   1   12.02    0.28
  -2   6  -1   11.74    0.38
   2   6   1   12.13    0.27
   2   6   1   12.17    0.35
   2   6   1   11.74    0.28
   3  -6   1    9.32    0.28
   3  -6   1    9.57    0.24
   3  -6   1    9.49    0.25
  -3   6  -1    9.11    0.39
   3   6   1    9.24    0.22
   3   6   1    9.79    0.22
   3   6   1    9.30    0.34
   4  -6   1    0.55    0.08
   4  -6   1    0.61    0.07
  -4   6  -1    0.67    0.20
   4   6   1    0.37    0.15
   5  -6   1    0.02    0.06
   5   6   1   -0.01    0.14
  -5   6  -1   -0.02    0.20
   5  -7  -1    2.26    0.16
  -5   7   1    2.78    0.33
   5   7  -1    3.40    0.26
   5   7  -1    3.07    0.15
   4  -7  -1    0.99    0.10
   4   7  -1    1.07    0.09
   4   7  -1    1.00    0.15
  -4   7   1    0.86    0.22
   4   7  -1    0.91    0.10
   3  -7  -1    3.33    0.14
   3  -7  -1    3.67    0.16
   3   7  -1    3.28    0.14
   3   7  -1    3.23    0.19
   3   7  -1    3.38    0.13
  -3   7   1    3.27    0.29
   2  -7  -1   13.89    0.32
   2  -7  -1   14.13    0.34
   2  -7  -1   13.99    0.33
   2  -7  -1   13.93    0.32
   2   7  -1   13.80    0.34
  -2   7   1   13.71    0.44
   2   7  -1   14.49    0.33
   2   7  -1   13.87    0.31
  -2   7   1   13.87    0.32
  -1  -7   1    9.69    0.22
   1  -7  -1   10.11    0.27
  -1  -7   1    9.31    0.23
   1  -7  -1    9.74    0.25
   1   7  -1   10.04    0.24
   1   7  -1   10.08    0.25
  -1   7   1    9.82    0.22
  -1   7   1    9.90    0.25
   1   7  -1    9.76    0.26
   0  -7  -1    3.28    0.13
   0  -7   1    3.06    0.12
   0   7   1    3.02    0.14
   0   7  -1    2.76    0.13
  -1  -7  -1   51.29    1.07
   1  -7   1   52.21    1.00
   1  -7   1   52.01    1.01
   1  -7   1   51.55    0.83
   1   7   1   52.30    1.01
   1   7   1   52.14    0.99
  -1   7  -1   50.73    1.00
   2  -7   1   26.13    0.54
   2  -7   1   25.50    0.55
   2  -7   1   26.37    0.49
   2   7   1   26.86    0.53
   2   7   1   25.88    0.54
  -2   7  -1   25.71    0.64
   2   7   1   25.50    0.61
   3  -7   1   16.83    0.41
   3  -7   1   17.45    0.40
   3  -7   1   17.75    0.41
   3   7   1   17.37    0.38
   3   7   1   17.59    0.37
  -3   7  -1   17.83    0.57
   3   7   1   16.80    0.50
   4  -7   1    2.48    0.14
  -4   7  -1    2.22    0.26
   4   7   1    2.46    0.23
   4   7   1    2.33    0.12
   4   7   1    2.45    0.13
   5  -7   1    0.09    0.07
   5   7   1    0.06    0.07
  -5   7  -1   -0.12    0.20
   5   7   1   -0.13    0.14
   5  -8  -1    0.30    0.09
   5   8  -1    0.53    0.16
   5   8  -1    0.37    0.09
  -5   8   1    0.71    0.22
   4  -8  -1    1.80    0.13
   4  -8  -1    1.64    0.13
   4   8  -1    1.73    0.18
   4   8  -1    1.68    0.12
   4   8  -1    1.83    0.12
  -4   8   1    1.73    0.26
   3  -8  -1   30.61    0.65
   3  -8  -1   28.84    0.62
   3  -8  -1   29.71    0.62
   3   8  -1   29.65    0.69
   3   8  -1   29.85    0.60
   3   8  -1   29.82    0.62
  -3   8   1   29.14    0.78
   2  -8  -1   56.71    1.10
   2  -8  -1   55.37    1.07
   2  -8  -1   56.56    0.95
   2   8  -1   54.42    1.12
   2   8  -1   55.85    1.06
  -2   8   1   53.64    1.17
  -2   8   1   54.16    0.95
   2   8  -1   55.70    1.08
  -1  -8   1   28.36    0.59
   1  -8  -1   28.82    0.60
  -1  -8   1   28.38    0.58
   1  -8  -1   29.34    0.62
  -1   8   1   29.15    0.51
  -1   8   1   28.69    0.61
   1   8  -1   30.45    0.60
   1   8  -1   28.67    0.62
   1   8  -1   29.11    0.59
   0  -8  -1    0.42    0.06
   0  -8   1    0.42    0.06
   0  -8   1    0.51    0.06
   0   8  -1    0.41    0.06
   0   8   1    0.44    0.07
  -1  -8  -1   53.35    1.11
   1  -8   1   54.58    1.07
  -1  -8  -1   51.03    1.02
   1  -8   1   54.88    0.86
   1  -8   1   54.68    1.05
  -1   8  -1   53.52    1.05
   1   8   1   55.98    1.04
   1   8   1   54.00    1.06
  -1   8  -1   53.28    0.87
   2  -8   1    0.02    0.05
   2  -8   1   -0.03    0.05
   2  -8   1   -0.01    0.06
  -2   8  -1   -0.13    0.09
   2   8   1    0.10    0.05
   2   8   1    0.12    0.07
   2   8   1   -0.03    0.05
   3  -8   1   76.61    1.45
   3  -8   1   77.14    1.32
   3  -8   1   76.19    1.47
  -3   8  -1   75.16    1.62
   3   8   1   78.62    1.44
   3   8   1   75.91    1.45
   3   8   1   76.31    1.63
   4  -8   1    9.42    0.27
   4   8   1    9.16    0.26
  -4   8  -1    9.01    0.44
   4   8   1    9.26    0.37
   5  -8   1    0.17    0.08
  -5   8  -1   -0.06    0.19
   5   8   1    0.21    0.08
   5   8   1    0.10    0.14
   5  -9  -1    0.00    0.08
  -5   9   1   -0.09    0.18
   5   9  -1    0.03    0.13
   5   9  -1    0.16    0.08
   4  -9  -1    0.86    0.10
   4  -9  -1    0.71    0.10
   4   9  -1    0.81    0.10
  -4   9   1    0.62    0.19
   4   9  -1    0.75    0.14
   3  -9  -1   79.86    1.51
   3  -9  -1   76.94    1.48
   3  -9  -1   76.21    1.48
  -3   9   1   76.44    1.65
   3   9  -1   78.08    1.60
   3   9  -1   77.94    1.46
   3   9  -1   76.42    1.48
   2  -9  -1   36.99    0.75
   2  -9  -1   36.01    0.77
   2  -9  -1   36.56    0.66
   2   9  -1   36.66    0.76
  -2   9   1   35.96    0.69
  -2   9   1   35.45    0.85
  -2   9   1   35.96    0.67
   2   9  -1   36.64    0.73
   1  -9  -1   95.51    1.80
  -1  -9   1   95.27    1.78
  -1   9   1   96.15    1.53
   1   9  -1   95.58    1.82
   1   9  -1   98.08    1.80
  -1   9   1   94.21    1.81
   1   9  -1   97.95    1.79
   0  -9   1    4.54    0.16
   0  -9  -1    4.65    0.16
   0  -9   1    4.47    0.16
   0   9  -1    4.69    0.19
   0   9   1    4.67    0.18
   1  -9   1   14.75    0.36
  -1  -9  -1   14.57    0.34
  -1   9  -1   13.92    0.36
  -1   9  -1   14.39    0.27
   1   9   1   14.90    0.37
   1   9   1   15.05    0.35
   2  -9   1   10.09    0.28
   2  -9   1   10.40    0.30
   2  -9   1   10.00    0.25
  -2   9  -1    9.37    0.35
   2   9   1   10.25    0.27
   2   9   1    9.67    0.28
   3  -9   1    0.06    0.07
   3  -9   1    0.20    0.10
   3  -9   1    0.16    0.07
  -3   9  -1    0.27    0.15
   3   9   1    0.13    0.06
   3   9   1    0.14    0.12
   3   9   1    0.14    0.07
   4  -9   1    0.67    0.09
   4   9   1    0.56    0.15
   4   9   1    0.67    0.10
  -4   9  -1    0.40    0.18
   5  -9   1    0.09    0.08
   5   9   1    0.07    0.08
  -5   9  -1    0.09    0.20
   5   9   1    0.15    0.15
   5 -10  -1    0.13    0.09
   5  10  -1    0.23    0.09
   5  10  -1    0.17    0.14
  -5  10   1    0.01    0.18
   4 -10  -1    1.43    0.14
   4  10  -1    1.55    0.17
  -4  10   1    1.11    0.22
   4  10  -1    1.64    0.15
   3 -10  -1    0.07    0.07
   3 -10  -1    0.21    0.08
   3  10  -1    0.09    0.06
   3  10  -1    0.00    0.09
  -3  10   1    0.23    0.15
   3  10  -1    0.19    0.08
   2 -10  -1   45.16    0.91
   2 -10  -1   46.50    0.94
  -2  10   1   44.44    0.80
   2  10  -1   44.81    0.90
  -2  10   1   44.89    0.86
  -2  10   1   44.20    1.01
   2  10  -1   44.01    0.92
  -1 -10   1   41.59    0.83
   1 -10  -1   41.53    0.85
  -1  10   1   41.37    0.71
  -1  10   1   41.41    0.86
   1  10  -1   41.83    0.87
   0 -10  -1   18.95    0.44
   0 -10   1   18.76    0.43
   0 -10   1   18.93    0.44
   0  10  -1   17.98    0.45
   0  10   1   19.00    0.46
  -1 -10  -1   47.63    0.94
   1 -10   1   48.08    0.96
   1  10   1   47.10    0.98
  -1  10  -1   48.72    0.97
  -1  10  -1   47.70    0.78
   2 -10   1    0.56    0.08
   2 -10   1    0.75    0.09
   2 -10   1    0.93    0.11
   2  10   1    0.71    0.10
  -2  10  -1    0.74    0.14
   2  10   1    0.53    0.08
  -2  10  -1    0.72    0.06
   3 -10   1    0.41    0.09
   3 -10   1    0.56    0.10
   3 -10   1    0.37    0.08
   3  10   1    0.56    0.08
   3  10   1    0.50    0.09
  -3  10  -1    0.47    0.17
   3  10   1    0.76    0.14
   4 -10   1    1.12    0.12
   4  10   1    0.99    0.12
   4  10   1    1.25    0.18
  -4  10  -1    0.86    0.23
   5 -10   1    0.19    0.09
   5  10   1    0.01    0.15
   5  10   1    0.12    0.09
  -5  10  -1    0.05    0.20
   5 -11  -1    0.01    0.09
   5  11  -1   -0.18    0.13
  -5  11   1   -0.06    0.17
   5  11  -1   -0.02    0.08
   4 -11  -1    0.21    0.09
   4  11  -1    0.03    0.11
  -4  11   1    0.00    0.18
   4  11  -1    0.20    0.09
   3 -11  -1    0.21    0.08
   3 -11  -1    0.31    0.08
   3  11  -1    0.24    0.08
   3  11  -1    0.42    0.08
  -3  11   1    0.14    0.17
  -2 -11   1   11.78    0.31
  -2 -11   1   11.71    0.25
   2 -11  -1   11.23    0.32
   2 -11  -1   11.33    0.35
   2  11  -1   11.40    0.34
  -2  11   1   11.79    0.43
   2  11  -1   11.78    0.32
  -2  11   1   11.33    0.29
   1 -11  -1   13.87    0.36
  -1 -11   1   13.65    0.34
  -1  11   1   13.91    0.38
   1  11  -1   13.27    0.38
  -1  11   1   13.92    0.29
   0 -11  -1  153.34    2.95
   0 -11   1  158.84    2.96
   0  11  -1  154.03    2.90
   0  11   1  155.54    2.90
  -1 -11  -1  183.48    3.49
   1 -11   1  190.05    3.40
   1  11   1  182.74    3.42
  -1  11  -1  184.52    3.41
  -1  11  -1  184.73    3.01
   2 -11   1    3.67    0.20
   2 -11   1    3.40    0.17
   2 -11   1    3.29    0.14
  -2  11  -1    3.81    0.25
   2  11   1    3.49    0.18
  -2  11  -1    3.36    0.14
   2  11   1    3.30    0.19
   3 -11   1    0.57    0.09
   3 -11   1    0.64    0.10
   3  11   1    0.55    0.10
  -3  11  -1    0.70    0.19
   3  11   1    0.62    0.08
   4 -11   1    7.51    0.27
   4  11   1    7.77    0.35
  -4  11  -1    7.39    0.42
   4  11   1    7.28    0.28
   5 -11   1    0.63    0.12
  -5  11  -1    0.56    0.24
   5  11   1    0.57    0.19
   5  11   1    0.60    0.12
   5 -12  -1   -0.05    0.09
   5  12  -1    0.00    0.09
  -5  12   1    0.23    0.22
   4 -12  -1    3.73    0.20
   4  12  -1    3.63    0.22
  -4  12   1    3.74    0.34
   3 -12  -1    9.56    0.33
   3 -12  -1    9.57    0.30
  -3  12   1    8.84    0.42
   3  12  -1    9.51    0.29
   3  12  -1    8.64    0.30
   2 -12  -1   38.44    0.82
  -2 -12   1   39.43    0.82
  -2 -12   1   38.70    0.74
   2  12  -1   40.35    0.81
   2  12  -1   38.42    0.84
  -2  12   1   37.35    0.91
  -2  12   1   37.19    0.71
   1 -12  -1   12.86    0.35
  -1 -12   1   12.54    0.33
   1  12  -1   12.31    0.37
  -1  12   1   12.59    0.36
  -1  12   1   12.59    0.28
   0 -12  -1   40.63    0.84
   0 -12   1   40.74    0.85
   0  12  -1   40.02    0.88
   0  12   1   40.28    0.88
  -1 -12  -1  100.18    1.88
   1 -12   1  100.39    1.90
   1  12   1   99.58    1.93
  -1  12  -1   97.48    1.57
  -1  12  -1  100.48    1.91
  -2 -12  -1   26.07    0.51
   2 -12   1   26.75    0.50
   2 -12   1   25.66    0.59
   2  12   1   25.28    0.62
   2  12   1   26.31    0.58
  -2  12  -1   24.97    0.67
   3 -12   1   15.21    0.41
   3  12   1   14.35    0.42
   3  12   1   15.36    0.40
  -3  12  -1   14.41    0.55
   4 -12   1    2.44    0.19
   4  12   1    2.37    0.19
  -4  12  -1    1.89    0.28
   5 -12   1    0.26    0.11
   5  12   1    0.08    0.11
  -5  12  -1    0.11    0.23
   5 -13  -1    0.04    0.09
  -5  13   1    0.20    0.20
   5  13  -1   -0.07    0.10
   4 -13  -1   11.00    0.36
   4  13  -1   10.29    0.36
  -4  13   1   10.66    0.51
   3 -13  -1    6.43    0.25
   3  13  -1    6.40    0.27
  -3  13   1    6.10    0.25
  -3  13   1    6.84    0.39
  -2 -13   1   34.57    0.74
   2 -13  -1   34.17    0.76
  -2 -13   1   34.73    0.68
  -2  13   1   32.88    0.65
   2  13  -1   34.48    0.78
   1 -13  -1   44.14    0.92
  -1 -13   1   43.84    0.90
   1  13  -1   43.58    0.95
  -1  13   1   43.52    0.93
   0 -13   1   53.38    1.07
   0 -13  -1   52.75    1.07
   0  13   1   51.80    1.10
   0  13  -1   51.95    1.10
   1 -13   1    9.95    0.32
   1 -13   1    9.46    0.31
  -1 -13  -1    9.42    0.29
  -1  13  -1   11.25    0.34
   1  13   1   11.03    0.34
  -1  13  -1    9.59    0.22
   2 -13   1    0.98    0.12
  -2 -13  -1    1.03    0.08
  -2  13  -1    1.19    0.20
   2  13   1    1.00    0.12
   3 -13   1   12.35    0.37
   3  13   1   12.54    0.40
  -3  13  -1   13.49    0.51
   4 -13   1   16.07    0.46
   4  13   1   15.87    0.47
  -4  13  -1   15.60    0.61
   5 -13   1    4.25    0.25
   5  13   1    4.26    0.27
  -5  13  -1    4.57    0.43
   5 -14  -1    1.17    0.15
   5  14  -1    1.28    0.17
  -5  14   1    1.72    0.30
   4 -14  -1   11.15    0.37
  -4  14   1   10.72    0.52
   4  14  -1   10.21    0.39
   3 -14  -1    2.71    0.19
  -3  14   1    2.31    0.17
   3  14  -1    3.02    0.21
  -3  14   1    2.68    0.29
  -2 -14   1    0.69    0.09
   2 -14  -1    0.42    0.09
  -2 -14   1    0.52    0.07
  -2  14   1    0.54    0.09
   2  14  -1    0.60    0.11
  -2  14   1    0.51    0.09
   1 -14  -1    9.49    0.30
  -1 -14   1    9.45    0.29
  -1  14   1    8.78    0.31
   1  14  -1    8.54    0.32
   0 -14   1  122.20    2.28
   0 -14  -1  121.26    2.28
   0  14   1  118.25    2.31
   0  14  -1  119.13    2.32
   1 -14   1   50.42    1.04
   1 -14   1   50.06    1.04
  -1 -14  -1   50.81    1.02
  -1  14  -1   49.37    1.05
  -1  14  -1   49.55    0.82
   1  14   1   49.44    1.07
   2 -14   1    1.13    0.13
  -2 -14  -1    1.35    0.10
  -2  14  -1    1.47    0.20
   2  14   1    1.12    0.14
  -2  14  -1    1.27    0.11
   3 -14   1    0.04    0.08
  -3  14  -1    0.03    0.16
   3  14   1   -0.01    0.09
   4 -14   1   10.46    0.37
   4  14   1   10.58    0.38
  -4  14  -1   10.20    0.51
   5 -14   1    9.20    0.35
  -5  14  -1    8.62    0.51
   5  14   1    8.18    0.36
   5 -15  -1    4.17    0.25
   5  15  -1    4.55    0.28
  -5  15   1    4.48    0.39
   4 -15  -1    0.78    0.13
   4  15  -1    0.19    0.14
  -4  15   1    0.98    0.25
   3 -15  -1   21.20    0.56
  -3  15   1   20.19    0.50
  -3  15   1   21.92    0.72
   3  15  -1   21.64    0.59
  -2 -15   1    1.77    0.14
   2 -15  -1    1.53    0.16
   2  15  -1    1.64    0.17
  -2  15   1    1.78    0.15
  -2  15   1    1.71    0.12
  -1 -15   1   15.55    0.41
   1 -15  -1   15.19    0.42
   1  15  -1   15.20    0.45
  -1  15   1   15.16    0.44
   0 -15   1    6.86    0.27
   0 -15  -1    6.95    0.26
   0  15  -1    6.94    0.29
   0  15   1    7.50    0.30
   1 -15   1   10.04    0.33
  -1 -15  -1   10.03    0.31
   1 -15   1    9.66    0.32
   1  15   1   10.84    0.36
  -1  15  -1   11.22    0.36
  -1  15  -1   10.07    0.23
  -2 -15  -1    0.84    0.09
   2 -15   1    0.69    0.11
   2  15   1    0.45    0.11
  -2  15  -1    0.77    0.10
  -2  15  -1    0.84    0.19
   3 -15   1    0.30    0.11
  -3  15  -1   -0.07    0.16
   3  15   1    0.34    0.11
   4 -15   1    2.36    0.22
   4  15   1    2.93    0.24
  -4  15  -1    2.44    0.33
   5 -15   1    0.32    0.13
   5 -15   1    0.55    0.14
   5  15   1    0.28    0.14
  -5  15  -1    0.79    0.26
   5 -16  -1    0.18    0.12
  -5  16   1    0.24    0.23
   5  16  -1    0.47    0.15
   4 -16  -1    9.76    0.36
   4  16  -1    9.02    0.39
  -4  16   1    9.63    0.52
   3 -16  -1   63.19    1.33
   3  16  -1   64.73    1.36
  -3  16   1   63.00    1.16
  -3  16   1   62.42    1.47
   2 -16  -1    4.32    0.23
  -2 -16   1    4.43    0.19
  -2  16   1    4.47    0.23
   2  16  -1    4.41    0.25
  -2  16   1    4.62    0.18
   1 -16  -1    6.09    0.26
  -1 -16   1    6.34    0.24
  -1  16   1    5.42    0.27
   1  16  -1    5.74    0.28
   0 -16  -1    1.87    0.16
   0 -16   1    1.73    0.16
   0  16  -1    1.58    0.16
   0  16   1    1.78    0.18
  -1 -16  -1    0.66    0.11
   1 -16   1    0.71    0.11
   1 -16   1    0.49    0.11
  -1  16  -1    0.86    0.07
   1  16   1    0.86    0.13
  -1  16  -1    0.90    0.13
   2 -16   1    0.89    0.13
   2 -16   1    0.81    0.12
  -2  16  -1    1.06    0.12
   2  16   1    0.84    0.14
  -2  16  -1    1.05    0.20
   3 -16   1    3.03    0.21
   3  16   1    2.86    0.23
  -3  16  -1    3.05    0.31
   4 -16   1    7.60    0.34
   4 -16   1    8.25    0.34
   4  16   1    8.16    0.36
  -4  16  -1    8.19    0.48
   5 -16   1    0.31    0.13
   5 -16   1    0.22    0.14
  -5  16  -1    0.33    0.26
   5  16   1   -0.01    0.14
   5 -17  -1    0.07    0.11
   5  17  -1   -0.01    0.13
  -5  17   1    0.24    0.22
   4 -17  -1    3.73    0.25
   4  17  -1    3.81    0.27
  -4  17   1    3.67    0.36
   3 -17  -1   46.61    1.04
  -3  17   1   46.86    0.91
  -3  17   1   45.62    1.18
   3  17  -1   47.21    1.08
   2 -17  -1    2.20    0.20
  -2  17   1    2.45    0.15
   2  17  -1    2.92    0.23
  -2  17   1    2.11    0.21
   1 -17  -1    1.29    0.14
  -1 -17   1    1.68    0.16
   1  17  -1    1.46    0.17
  -1  17   1    1.28    0.15
   0 -17  -1    0.74    0.11
   0 -17   1    0.70    0.11
   0  17   1    0.68    0.12
   0  17  -1    0.65    0.12
  -1 -17  -1    0.01    0.08
   1 -17   1    0.02    0.08
  -1  17  -1    0.11    0.10
  -1  17  -1    0.07    0.05
   1  17   1    0.17    0.10
   2 -17   1   -0.06    0.09
  -2 -17  -1    0.01    0.02
   2 -17   1   -0.06    0.09
  -2  17  -1   -0.03    0.08
   2  17   1   -0.08    0.09
  -2  17  -1   -0.04    0.16
  -2  17  -1    0.03    0.06
   3 -17   1    0.69    0.13
   3 -17   1    0.19    0.12
  -3  17  -1    0.99    0.23
   3  17   1    0.67    0.14
   4 -17   1   18.47    0.54
   4 -17   1   16.94    0.53
   4  17   1   18.59    0.57
  -4  17  -1   19.53    0.73
   5 -17   1    2.10    0.22
   5 -17   1    2.07    0.22
  -5  17  -1    2.05    0.35
   5  17   1    1.67    0.22
   4 -18  -1    0.73    0.15
  -4  18   1    0.87    0.25
   4  18  -1    0.73    0.16
   3 -18  -1    2.28    0.22
   3  18  -1    2.63    0.26
  -3  18   1    2.52    0.20
  -3  18   1    1.64    0.28
   2 -18  -1   24.24    0.64
  -2 -18   1   25.21    0.58
  -2  18   1   24.47    0.53
   2  18  -1   25.14    0.69
  -2  18   1   25.25    0.64
   1 -18  -1    4.48    0.25
  -1 -18   1    4.91    0.24
  -1  18   1    5.16    0.28
   1  18  -1    4.64    0.27
   0 -18  -1   25.79    0.64
   0 -18   1   25.96    0.64
   0  18   1   24.86    0.67
   0  18  -1   25.23    0.67
  -1 -18  -1   11.23    0.36
   1 -18   1   10.63    0.37
  -1  18  -1   11.23    0.25
   1  18   1   10.59    0.40
  -1  18  -1   11.25    0.40
   2 -18   1    1.46    0.17
   2 -18   1    1.82    0.19
   2  18   1    2.03    0.21
  -2  18  -1    1.76    0.12
  -2  18  -1    1.89    0.18
   3 -18   1    0.50    0.13
   3 -18   1    0.23    0.12
   3  18   1    0.47    0.14
  -3  18  -1    0.31    0.20
   4 -18   1    3.33    0.24
   4 -18   1    3.38    0.26
  -4  18  -1    2.81    0.36
   4  18   1    3.00    0.26
   4 -19  -1    0.56    0.14
  -4  19   1    0.57    0.24
   4  19  -1    0.56    0.15
   3 -19  -1    5.46    0.29
  -3  19   1    5.58    0.43
  -3  19   1    5.29    0.24
   3  19  -1    5.10    0.31
   2 -19  -1    5.63    0.31
  -2  19   1    5.61    0.22
  -2  19   1    5.53    0.31
   2  19  -1    5.84    0.33
   1 -19  -1    1.77    0.19
  -1 -19   1    2.51    0.20
  -1  19   1    2.42    0.22
   1  19  -1    2.43    0.24
   0 -19   1    0.31    0.11
   0  19   1    0.43    0.12
   1 -19   1   17.60    0.52
  -1 -19  -1   18.05    0.49
  -1  19  -1   17.36    0.36
  -1  19  -1   17.62    0.53
   1  19   1   17.51    0.54
   2 -19   1    0.61    0.15
   2  19   1    0.94    0.16
  -2  19  -1    0.91    0.10
  -2  19  -1    0.82    0.15
   3 -19   1    9.87    0.37
   3 -19   1    8.95    0.38
  -3  19  -1    8.14    0.47
   3  19   1    9.32    0.41
   4 -19   1    0.07    0.12
   4 -19   1    0.28    0.13
  -4  19  -1   -0.17    0.23
   4  19   1    0.14    0.14
   4 -20  -1   -0.06    0.11
   4  20  -1   -0.07    0.13
  -4  20   1    0.29    0.21
   3 -20  -1    0.23    0.12
  -3  20   1    0.18    0.10
  -3  20   1   -0.09    0.20
   3  20  -1   -0.10    0.14
   2 -20  -1   32.75    0.84
   2  20  -1   34.44    0.89
  -2  20   1   34.23    0.68
  -1 -20   1   10.80    0.37
   1 -20  -1    9.82    0.38
   1  20  -1   10.16    0.41
  -1  20   1   10.09    0.42
   0 -20  -1    0.14    0.11
   0 -20   1    0.23    0.11
   0  20   1    0.08    0.12
   0  20  -1    0.28    0.13
   1 -20   1    0.21    0.11
  -1 -20  -1    0.38    0.11
  -1  20  -1    0.55    0.15
  -1  20  -1    0.32    0.07
   2 -20   1    9.09    0.38
  -2  20  -1   10.11    0.27
   2  20   1    9.60    0.40
   3 -20   1   36.59    0.91
  -3  20  -1   38.30    1.05
   3  20   1   36.01    0.94
   4 -20   1    0.22    0.13
  -4  20  -1   -0.01    0.22
   4  20   1    0.08    0.14
   4 -21  -1    0.63    0.15
   4  21  -1    0.61    0.18
  -4  21   1    0.77    0.26
   3 -21  -1    0.09    0.12
  -3  21   1   -0.12    0.20
   3  21  -1   -0.21    0.14
  -3  21   1    0.13    0.10
   2 -21  -1   37.80    0.92
  -2  21   1   37.92    0.74
   2  21  -1   37.10    0.97
  -1 -21   1   31.02    0.76
   1 -21  -1   30.89    0.80
   1  21  -1   31.29    0.84
  -1  21   1   31.88    0.83
   0 -21   1    1.56    0.17
   0 -21  -1    1.44    0.18
   0  21  -1    1.55    0.20
   0  21   1    1.88    0.22
  -1 -21  -1    1.03    0.15
   1 -21   1    0.88    0.15
  -1  21  -1    0.95    0.18
   1  21   1    0.96    0.16
  -1  21  -1    1.03    0.09
   2 -21   1    4.77    0.30
  -2  21  -1    4.85    0.19
   2  21   1    4.78    0.31
   3 -21   1    9.88    0.42
  -3  21  -1   10.92    0.56
   3  21   1    9.93    0.45
   4 -21   1    0.13    0.13
  -4  21  -1    0.18    0.22
   4  21   1    0.07    0.16
   4 -22  -1    0.03    0.12
   4  22  -1   -0.20    0.14
  -4  22   1    0.12    0.20
   3 -22  -1    1.29    0.18
   3  22  -1    1.20    0.21
  -3  22   1    1.46    0.16
  -3  22   1    1.46    0.28
   2 -22  -1    5.60    0.31
  -2  22   1    5.79    0.24
   2  22  -1    6.40    0.38
  -1 -22   1    2.55    0.22
   1 -22  -1    1.61    0.20
   1  22  -1    2.02    0.23
  -1  22   1    1.73    0.22
  -1  22   1    2.05    0.17
   0 -22   1    0.02    0.12
   0 -22  -1    0.03    0.13
   0  22   1    0.02    0.13
   0  22  -1    0.03    0.13
   1 -22   1    6.13    0.32
  -1 -22  -1    5.94    0.30
   1  22   1    5.99    0.35
  -1  22  -1    6.39    0.19
  -1  22  -1    6.08    0.35
   2 -22   1    0.84    0.18
  -2  22  -1    0.81    0.11
   2  22   1    1.07    0.19
   3 -22   1    1.04    0.18
   3  22   1    0.94    0.19
  -3  22  -1    1.59    0.31
   4 -22   1    1.03    0.18
   4  22   1    0.81    0.20
  -4  22  -1    1.44    0.30
   4 -23  -1    0.19    0.13
  -4  23   1    0.43    0.24
   4  23  -1    0.39    0.17
   3 -23  -1   -0.08    0.11
   3  23  -1   -0.21    0.14
  -3  23   1   -0.28    0.20
  -3  23   1   -0.11    0.09
   2 -23  -1    0.19    0.13
  -2  23   1    0.16    0.10
   2  23  -1    0.23    0.16
   1 -23  -1    7.57    0.37
  -1 -23   1    7.89    0.34
  -1  23   1    7.71    0.26
  -1  23   1    8.01    0.40
   1  23  -1    8.42    0.42
   0 -23  -1    8.99    0.37
   0 -23   1    9.34    0.38
   0  23   1    8.93    0.43
   0  23  -1    8.97    0.42
  -1 -23  -1    4.32    0.27
   1 -23   1    3.78    0.28
   1  23   1    4.12    0.31
  -1  23  -1    4.16    0.16
  -1  23  -1    4.14    0.31
   2 -23   1   13.52    0.49
   2  23   1   13.99    0.54
  -2  23  -1   14.04    0.35
   3 -23   1    7.84    0.38
  -3  23  -1    8.54    0.53
   3  23   1    7.26    0.41
   4 -23   1    1.26    0.19
   4  23   1    0.76    0.21
  -4  23  -1    1.11    0.31
   4 -24  -1    0.10    0.14
   4  24  -1    0.09    0.16
  -4  24   1    0.27    0.24
   3 -24  -1    0.30    0.14
   3  24  -1    0.09    0.15
  -3  24   1   -0.17    0.21
  -3  24   1    0.49    0.12
   2 -24  -1    2.38    0.24
  -2  24   1    2.41    0.17
   2  24  -1    2.04    0.25
  -1 -24   1    0.88    0.16
   1 -24  -1    0.70    0.16
  -1  24   1    0.79    0.12
   1  24  -1    0.75    0.19
   0 -24   1    0.29    0.15
   0 -24  -1    0.13    0.14
   0  24   1    0.21    0.17
   0  24  -1    0.37    0.18
   1 -24   1    0.36    0.15
  -1 -24  -1    0.30    0.14
  -1  24  -1    0.36    0.16
   1  24   1    0.49    0.17
  -1  24  -1    0.47    0.08
   2 -24   1    3.63    0.29
   2  24   1    3.64    0.32
  -2  24  -1    3.61    0.18
   3 -24   1    5.93    0.34
   3  24   1    6.04    0.38
  -3  24  -1    6.29    0.49
   3 -25  -1    1.51    0.21
  -3  25   1    1.13    0.30
  -3  25   1    1.43    0.16
   3  25  -1    1.29    0.22
   2 -25  -1    1.03    0.18
  -2  25   1    1.20    0.13
   2  25  -1    0.85    0.20
  -1 -25   1   -0.24    0.12
   1 -25  -1    0.14    0.13
  -1  25   1   -0.10    0.09
  -1  25   1    0.17    0.15
   1  25  -1   -0.14    0.15
   0 -25  -1    0.57    0.15
   0 -25   1    0.36    0.15
   0  25  -1    0.30    0.18
   0  25   1    0.34    0.16
  -1 -25  -1    1.49    0.19
   1 -25   1    1.24    0.20
  -1  25  -1    0.99    0.20
  -1  25  -1    1.38    0.12
   1  25   1    1.03    0.21
   2 -25   1    1.88    0.22
   2  25   1    1.97    0.26
   3 -25   1    1.96    0.23
  -3  25  -1    2.58    0.36
   3  25   1    2.16    0.27
   3 -26  -1   -0.04    0.13
  -3  26   1    0.13    0.23
   3  26  -1    0.10    0.16
   2 -26  -1    0.09    0.13
  -2  26   1    0.04    0.10
   2  26  -1    0.15    0.16
   1 -26  -1    0.47    0.16
  -1  26   1    0.43    0.17
   1  26  -1    0.26    0.18
  -1  26   1    0.43    0.10
   0 -26   1    3.48    0.29
   0 -26  -1    4.27    0.30
   0  26   1    3.89    0.34
   0  26  -1    4.31    0.33
   1 -26   1    7.46    0.38
  -1  26  -1    7.38    0.41
   1  26   1    7.47    0.43
   2 -26   1    0.67    0.17
   2  26   1    0.44    0.18
   3 -26   1    0.09    0.14
   3  26   1    0.16    0.17
  -3  26  -1    0.14    0.24
   3 -27  -1    0.29    0.17
  -3  27   1    0.21    0.25
   3  27  -1    0.29    0.18
   2 -27  -1    0.73    0.17
  -2  27   1    0.61    0.12
   2  27  -1    0.77    0.20
   1 -27  -1    0.19    0.15
  -1  27   1    0.51    0.11
   1  27  -1    0.24    0.17
  -1  27   1    0.59    0.19
   0 -27   1    2.85    0.28
   0 -27  -1    2.49    0.25
   0  27  -1    2.80    0.30
   0  27   1    2.72    0.29
   1 -27   1   -0.01    0.13
   1  27   1    0.12    0.18
  -1  27  -1    0.19    0.16
   2 -27   1   -0.16    0.13
   2  27   1    0.10    0.15
   3 -27   1    0.03    0.15
  -3  27  -1   -0.14    0.25
   3  27   1    0.04    0.17
   2 -28  -1    1.91    0.24
   2  28  -1    2.11    0.27
   1 -28  -1    0.27    0.16
  -1  28   1    0.06    0.10
   1  28  -1    0.11    0.18
  -1  28   1    0.45    0.19
   0 -28   1    0.31    0.15
   0 -28  -1    0.05    0.14
   0  28  -1    0.16    0.18
   0  28   1    0.30    0.17
   1 -28   1    0.32    0.16
   1  28   1    0.20    0.19
   2 -28   1   -0.08    0.14
   2  28   1   -0.01    0.17
   2 -29  -1   -0.01    0.15
   2  29  -1    0.01    0.16
   1 -29  -1    0.38    0.18
   1  29  -1    0.62    0.22
   0 -29  -1   -0.16    0.15
   0 -29   1    0.03    0.15
   0  29   1    0.04    0.18
   0  29  -1    0.02    0.18
   1 -29   1    0.51    0.18
   1  29   1    0.62    0.21
   2 -29   1    0.65    0.19
   2  29   1    0.62    0.22
   2 -30  -1    0.89    0.21
   2  30  -1    0.81    0.23
   1 -30  -1    0.06    0.16
   1  30  -1    0.22    0.20
   0 -30   1    1.06    0.21
   0 -30  -1    1.13    0.22
   0  30   1    1.21    0.25
   0  30  -1    1.11    0.25
   1 -30   1    1.25    0.22
   1  30   1    1.29    0.26
   2 -30   1    0.49    0.19
   2  30   1    0.55    0.22
   1 -31  -1    0.94    0.22
   1  31  -1    0.92    0.25
   0 -31   1    0.19    0.17
   0 -31  -1   -0.12    0.16
   0  31  -1   -0.16    0.19
   0  31   1    0.08    0.18
   1 -31   1    0.04    0.16
   1  31   1    0.08    0.20
   0  32   1    0.13    0.22
   0  32  -1    0.17    0.21
  -5   0   2    5.19    0.40
   5   0  -2    5.49    0.17
  -4   0   2    5.06    0.35
   3   0  -2    2.51    0.08
  -3   0   2    2.61    0.21
   2   0  -2   22.42    0.44
   2   0  -2   22.41    0.44
   2   0  -2   23.20    0.45
  -2   0   2   22.46    0.55
   1   0  -2  191.41    3.16
  -1   0   2  192.79    3.12
   1   0  -2  193.31    3.51
  -1   0   2  190.25    3.67
   1   0  -2  189.64    3.64
   1   0  -2  195.72    3.61
   0   0   2   84.78    1.62
   0   0  -2   86.73    1.62
   0   0  -2   84.72    1.72
   0   0   2   88.81    1.64
   0   0  -2   88.85    1.66
   2   0   2  144.99    2.64
   2   0   2  145.15    2.60
  -2   0  -2  142.73    2.70
   2   0   2  144.90    2.89
   3   0   2   39.96    0.96
  -3   0  -2   39.02    0.93
  -4   0  -2    2.93    0.31
   4   0   2    3.50    0.27
  -5   0  -2   11.69    0.58
   5   0   2   11.08    0.48
  -5  -1   2    2.81    0.33
   5  -1  -2    2.48    0.13
   5   1  -2    2.40    0.12
  -5   1   2    2.31    0.32
  -4  -1   2    3.80    0.32
  -4   1   2    3.79    0.30
   3  -1  -2    1.23    0.07
  -3  -1   2    1.21    0.16
   3  -1  -2    1.25    0.07
  -3   1   2    1.14    0.16
   3   1  -2    0.95    0.06
   2  -1  -2    0.06    0.05
   2  -1  -2   -0.04    0.03
  -2  -1   2   -0.12    0.08
   2  -1  -2   -0.05    0.03
   2   1  -2    0.02    0.06
   2   1  -2   -0.17    0.03
  -2   1   2   -0.21    0.09
  -1  -1   2    9.77    0.21
   1  -1  -2    9.81    0.21
   1  -1  -2   10.18    0.27
  -1  -1   2    9.33    0.25
   1  -1  -2    9.71    0.23
   1  -1  -2    9.80    0.23
   1   1  -2    9.36    0.25
   1   1  -2    9.97    0.23
  -1   1   2    9.23    0.26
  -1   1   2    9.93    0.21
   1   1  -2    9.99    0.23
   1   1  -2    9.72    0.20
   0  -1   2  226.63    4.20
   0  -1   2  217.67    4.48
   0  -1   2  227.83    4.26
   0  -1  -2  223.73    4.22
   0  -1  -2  226.28    4.25
   0   1   2  216.37    4.24
   0   1  -2  217.72    4.47
   0   1  -2  221.46    4.22
   0   1   2  227.90    4.20
   0   1  -2  230.07    4.28
  -1  -1  -2  978.39   19.24
   1  -1   2 1000.00   17.84
   1   1   2  973.31   17.84
   2  -1   2    3.61    0.12
  -2  -1  -2    3.28    0.22
   2  -1   2    3.18    0.20
   2  -1   2    3.39    0.11
   2   1   2    2.80    0.11
  -2   1  -2    3.47    0.23
   2   1   2    4.04    0.20
   2   1   2    2.73    0.11
   3  -1   2    2.70    0.21
  -3  -1  -2    2.69    0.25
  -3   1  -2    2.55    0.24
   3   1   2    2.76    0.20
   4  -1   2    0.16    0.15
  -4  -1  -2   -0.12    0.18
   4   1   2    0.24    0.14
  -4   1  -2   -0.01    0.19
   5  -1   2    0.91    0.22
   5   1   2    0.67    0.19
  -5   1  -2    0.44    0.25
   5  -2  -2    2.39    0.13
  -5  -2   2    1.82    0.29
  -5   2   2    2.28    0.32
   4  -2  -2   -0.02    0.04
  -4  -2   2   -0.21    0.14
   4  -2  -2    0.01    0.04
  -4   2   2   -0.14    0.14
   3  -2  -2   28.56    0.55
   3  -2  -2   27.89    0.54
  -3  -2   2   27.48    0.72
  -3   2   2   28.38    0.73
   3   2  -2   28.64    0.54
   3   2  -2   27.50    0.53
   2  -2  -2  187.86    3.37
  -2  -2   2  182.30    3.37
   2  -2  -2  184.15    2.87
   2  -2  -2  178.79    3.39
   2   2  -2  182.95    3.39
   2   2  -2  184.90    2.88
  -2   2   2  182.65    2.93
  -2   2   2  182.86    3.39
   2   2  -2  181.72    3.35
  -1  -2   2   69.72    1.12
   1  -2  -2   68.60    1.12
  -1  -2   2   68.95    1.30
   1  -2  -2   70.03    1.29
   1  -2  -2   70.26    1.30
   1   2  -2   70.85    1.29
  -1   2   2   69.76    1.32
   1   2  -2   68.82    1.11
   1   2  -2   70.85    1.30
   1   2  -2   71.15    1.32
  -1   2   2   69.72    1.12
   0  -2  -2    3.29    0.12
   0  -2   2    3.41    0.12
   0  -2   2    3.17    0.11
   0  -2   2    3.31    0.12
   0  -2  -2    3.00    0.12
   0   2   2    3.27    0.12
   0   2  -2    3.15    0.11
   0   2   2    3.08    0.12
   0   2  -2    3.36    0.12
   0   2  -2    3.32    0.12
   1  -2   2  195.67    3.57
  -1  -2  -2  161.31    3.45
  -1  -2  -2  192.43    3.90
   1  -2   2  192.84    3.50
   1  -2   2  189.15    3.61
   1   2   2  194.98    3.52
   1   2   2  192.40    3.42
  -1   2  -2  186.52    3.57
   1   2   2  194.59    3.61
   2  -2   2   22.87    0.46
   2  -2   2   22.86    0.46
   2   2   2   22.50    0.45
   2   2   2   22.77    0.45
   2   2   2   22.26    0.57
  -2   2  -2   22.06    0.56
   3  -2   2    3.56    0.12
   3  -2   2    3.53    0.12
  -3  -2  -2    3.69    0.30
   3   2   2    3.34    0.21
  -3   2  -2    3.54    0.28
  -4  -2  -2    7.77    0.42
   4  -2   2    8.12    0.21
   4  -2   2    8.41    0.22
   4  -2   2    8.21    0.38
   4   2   2    8.26    0.38
  -4   2  -2    8.36    0.42
   5  -2   2    0.35    0.17
   5  -2   2   -0.01    0.07
  -5   2  -2    0.19    0.24
   5   2   2    0.11    0.15
  -5  -3   2    9.81    0.53
   5  -3  -2    9.28    0.25
   5   3  -2    9.31    0.41
   5   3  -2    7.30    0.24
  -5   3   2    8.69    0.48
   4  -3  -2   -0.04    0.04
  -4  -3   2    0.02    0.17
   4  -3  -2   -0.02    0.05
   4   3  -2    0.02    0.04
  -4   3   2    0.04    0.16
  -3  -3   2    8.38    0.36
   3  -3  -2    8.54    0.21
   3  -3  -2    8.39    0.20
   3   3  -2    8.42    0.20
   3   3  -2    8.03    0.19
  -3   3   2    8.20    0.35
  -2  -3   2    4.81    0.22
   2  -3  -2    4.62    0.15
   2  -3  -2    5.03    0.16
   2  -3  -2    5.21    0.18
  -2   3   2    5.01    0.18
   2   3  -2    4.96    0.15
   2   3  -2    4.76    0.14
   2   3  -2    4.82    0.17
  -1  -3   2   13.17    0.31
   1  -3  -2   13.45    0.31
   1  -3  -2   13.82    0.30
  -1   3   2   13.33    0.30
   1   3  -2   13.40    0.26
   1   3  -2   13.11    0.30
  -1   3   2   13.57    0.34
   1   3  -2   13.23    0.31
   1   3  -2   13.26    0.30
   0  -3   2    1.52    0.08
   0  -3   2    1.62    0.09
   0  -3  -2    1.68    0.09
   0   3  -2    1.71    0.09
   0   3   2    1.61    0.08
   0   3  -2    1.59    0.10
   0   3   2    1.47    0.09
   1  -3   2  614.52   11.60
  -1  -3  -2  623.02   12.63
   1  -3   2  645.17   11.61
   1   3   2  654.26   11.62
  -1   3  -2  637.83   11.64
   1   3   2  630.63   11.68
   2  -3   2   32.88    0.65
   2  -3   2   33.58    0.66
   2   3   2   32.52    0.77
  -2   3  -2   32.68    0.74
   2   3   2   32.38    0.64
   2   3   2   34.75    0.64
   3  -3   2    1.45    0.09
   3  -3   2    1.52    0.09
   3   3   2    1.34    0.08
   3   3   2    1.40    0.08
   3   3   2    1.32    0.16
  -3   3  -2    1.49    0.18
   4  -3   2   18.43    0.40
   4  -3   2   19.25    0.41
   4   3   2   18.53    0.59
  -4   3  -2   18.72    0.63
   5  -3   2   10.21    0.28
   5  -3   2   10.13    0.48
  -5   3  -2    9.87    0.52
   5   3   2   10.15    0.45
  -5  -4   2   39.68    1.10
   5  -4  -2   40.01    0.81
   5   4  -2   40.39    0.80
  -5   4   2   39.16    1.10
   5   4  -2   42.12    1.03
   4  -4  -2    2.84    0.13
  -4  -4   2    2.78    0.28
   4  -4  -2    2.74    0.14
  -4   4   2    2.97    0.31
   4   4  -2    2.92    0.12
   4   4  -2    2.82    0.11
  -3  -4   2    3.62    0.25
   3  -4  -2    3.50    0.14
   3  -4  -2    3.53    0.13
   3   4  -2    3.43    0.12
   3   4  -2    3.67    0.12
  -3   4   2    3.89    0.26
   2  -4  -2   16.84    0.36
   2  -4  -2   16.21    0.36
   2  -4  -2   16.50    0.37
  -2  -4   2   16.02    0.43
   2   4  -2   16.38    0.36
  -2   4   2   16.50    0.47
  -2   4   2   16.27    0.37
   2   4  -2   16.08    0.36
   2   4  -2   15.91    0.35
   1  -4  -2   51.77    0.98
   1  -4  -2   51.19    0.99
  -1   4   2   50.73    0.85
   1   4  -2   52.34    0.99
   1   4  -2   50.92    0.84
  -1   4   2   51.55    0.98
   1   4  -2   51.30    0.98
   1   4  -2   52.62    0.99
   0  -4   2   20.64    0.44
   0  -4   2   20.73    0.44
   0  -4  -2   20.35    0.43
   0   4  -2   20.77    0.45
   0   4   2   20.39    0.44
   0   4   2   20.84    0.43
  -1  -4  -2    0.65    0.09
   1  -4   2    0.96    0.09
   1  -4   2    0.43    0.09
   1  -4   2    0.83    0.08
   1   4   2    0.50    0.07
  -1   4  -2    0.62    0.08
   1   4   2    0.64    0.09
   1   4   2    0.32    0.07
   2  -4   2   13.79    0.32
   2  -4   2   13.48    0.31
   2   4   2   13.08    0.31
   2   4   2   13.76    0.39
  -2   4  -2   13.08    0.40
   2   4   2   13.59    0.30
   3  -4   2    0.52    0.06
   3  -4   2    0.31    0.06
   3   4   2    0.32    0.13
  -3   4  -2    0.33    0.14
   3   4   2    0.39    0.05
   3   4   2    0.38    0.05
   4  -4   2    5.97    0.19
   4  -4   2    6.15    0.20
  -4   4  -2    5.56    0.38
   4   4   2    5.91    0.32
   4   4   2    5.01    0.17
   4   4   2    5.48    0.17
   5  -4   2    1.55    0.25
   5  -4   2    1.34    0.13
   5   4   2    1.61    0.24
   5   4   2    1.14    0.10
  -5   4  -2    1.16    0.28
   5  -5  -2   22.08    0.51
   5   5  -2   23.00    0.66
  -5   5   2   21.90    0.77
   5   5  -2   22.79    0.50
   4  -5  -2    3.84    0.15
   4  -5  -2    3.71    0.16
  -4  -5   2    3.95    0.34
   4   5  -2    3.75    0.14
   4   5  -2    3.59    0.22
  -4   5   2    3.75    0.30
   4   5  -2    3.78    0.15
   3  -5  -2    8.74    0.23
   3  -5  -2    9.02    0.24
  -3  -5   2    9.09    0.37
   3   5  -2    9.03    0.23
   3   5  -2    9.18    0.22
  -3   5   2    8.91    0.38
  -2  -5   2  204.32    3.72
   2  -5  -2  203.71    3.17
   2  -5  -2  202.55    3.75
   2  -5  -2  201.94    3.82
   2   5  -2  202.61    3.17
  -2   5   2  200.53    3.75
  -2   5   2  201.61    3.18
   2   5  -2  201.16    3.80
   2   5  -2  205.43    3.75
  -1  -5   2    1.43    0.08
   1  -5  -2    1.46    0.09
   1  -5  -2    1.59    0.10
   1   5  -2    1.57    0.07
   1   5  -2    2.01    0.12
   1   5  -2    1.57    0.09
  -1   5   2    1.54    0.09
  -1   5   2    1.63    0.09
   1   5  -2    1.64    0.11
   0  -5  -2   80.08    1.49
   0  -5   2   80.03    1.49
   0   5  -2   79.81    1.50
   0   5   2   78.33    1.50
   1  -5   2    0.42    0.06
  -1  -5  -2    0.36    0.07
   1  -5   2    0.57    0.07
   1   5   2    0.36    0.06
  -1   5  -2    0.45    0.08
   1   5   2    0.45    0.06
  -1   5  -2    0.42    0.05
   2  -5   2    0.28    0.05
   2  -5   2    0.27    0.05
   2   5   2    0.17    0.05
   2   5   2    0.26    0.09
  -2   5  -2    0.21    0.10
   2   5   2    0.17    0.05
   3  -5   2    0.11    0.05
   3  -5   2    0.13    0.05
   3   5   2    0.18    0.04
  -3   5  -2    0.09    0.14
   3   5   2    0.25    0.05
   3   5   2    0.08    0.10
   4  -5   2    0.22    0.07
   4   5   2    0.08    0.06
   4   5   2    0.15    0.13
   4   5   2    0.06    0.06
  -4   5  -2   -0.11    0.16
   5  -5   2    0.51    0.09
   5  -5   2    0.65    0.21
  -5   5  -2    0.34    0.22
   5   5   2    0.22    0.17
   5   5   2    0.38    0.08
   5  -6  -2    0.84    0.11
   5   6  -2    0.92    0.11
   5   6  -2    1.04    0.19
  -5   6   2    0.87    0.23
   4  -6  -2    0.53    0.08
   4   6  -2    0.74    0.13
   4   6  -2    0.43    0.07
  -4   6   2    0.59    0.18
   4   6  -2    0.68    0.07
   3  -6  -2    0.76    0.08
   3  -6  -2    0.61    0.07
   3   6  -2    0.71    0.07
   3   6  -2    0.68    0.07
  -3   6   2    0.63    0.15
   3   6  -2    0.59    0.10
   2  -6  -2   -0.02    0.05
   2  -6  -2   -0.02    0.07
   2  -6  -2    0.05    0.05
   2   6  -2   -0.01    0.04
   2   6  -2   -0.07    0.05
  -2   6   2   -0.08    0.11
  -2   6   2   -0.11    0.07
   2   6  -2    0.04    0.06
   1  -6  -2  115.55    2.13
  -1  -6   2  113.64    2.11
  -1  -6   2  115.35    2.12
   1  -6  -2  113.58    2.21
   1   6  -2  115.05    2.11
  -1   6   2  114.47    2.18
   1   6  -2  114.64    2.13
  -1   6   2  113.20    1.89
   1   6  -2  116.27    2.11
   0  -6  -2   50.27    0.97
   0  -6   2   49.39    0.97
   0   6  -2   50.76    0.99
   0   6   2   49.77    0.99
  -1  -6  -2   33.85    0.76
   1  -6   2   35.18    0.70
   1  -6   2   34.89    0.71
  -1   6  -2   34.29    0.70
   1   6   2   35.28    0.70
  -1   6  -2   34.25    0.71
   1   6   2   34.09    0.71
   2  -6   2   10.25    0.28
   2  -6   2   10.40    0.27
   2   6   2    9.96    0.33
   2   6   2    9.68    0.27
  -2   6  -2    9.85    0.35
   2   6   2    9.97    0.26
   3  -6   2    0.32    0.10
   3  -6   2    0.59    0.08
   3  -6   2    0.65    0.08
  -3   6  -2    0.70    0.17
   3   6   2    0.82    0.15
   3   6   2    0.78    0.08
   3   6   2    0.95    0.09
   4  -6   2    0.85    0.10
  -4   6  -2    0.81    0.20
   4   6   2    0.83    0.09
   4   6   2    0.77    0.17
   5  -6   2    0.65    0.09
  -5   6  -2    0.20    0.24
   5   6   2    0.47    0.09
   5   6   2    0.48    0.18
   5  -7  -2    9.10    0.29
   5   7  -2    9.33    0.38
  -5   7   2    9.29    0.51
   5   7  -2    8.75    0.28
   4  -7  -2   10.64    0.30
   4   7  -2   11.02    0.30
  -4   7   2   11.01    0.48
   4   7  -2   11.52    0.37
   3  -7  -2    3.31    0.15
   3  -7  -2    3.36    0.16
   3   7  -2    3.12    0.15
  -3   7   2    3.16    0.26
   3   7  -2    3.18    0.13
   3   7  -2    3.10    0.16
   2  -7  -2  144.32    2.80
   2  -7  -2  145.47    2.69
   2  -7  -2  145.52    2.31
  -2   7   2  147.76    2.62
   2   7  -2  144.61    2.86
  -2   7   2  143.99    2.33
  -2   7   2  142.45    2.76
   2   7  -2  147.17    2.72
   2   7  -2  148.19    2.66
   1  -7  -2   82.80    1.57
   1  -7  -2   82.71    1.59
  -1  -7   2   82.85    1.55
  -1  -7   2   84.64    1.55
  -1   7   2   84.17    1.35
   1   7  -2   83.05    1.59
  -1   7   2   81.81    1.57
   1   7  -2   85.20    1.57
   0  -7  -2   34.35    0.70
   0  -7   2   34.60    0.70
   0   7  -2   34.25    0.72
   0   7   2   35.43    0.73
   1  -7   2   14.38    0.35
   1  -7   2   14.47    0.26
   1  -7   2   14.88    0.37
  -1  -7  -2   14.08    0.33
   1   7   2   14.88    0.35
  -1   7  -2   14.44    0.37
   1   7   2   14.44    0.36
  -1   7  -2   14.69    0.35
   2  -7   2   28.95    0.62
   2  -7   2   28.65    0.60
   2  -7   2   27.75    0.53
   2   7   2   28.27    0.61
   2   7   2   29.29    0.69
   2   7   2   28.87    0.59
  -2   7  -2   27.71    0.67
   3  -7   2    0.15    0.07
   3  -7   2    0.02    0.06
   3  -7   2    0.11    0.09
   3   7   2    0.16    0.06
   3   7   2    0.07    0.11
  -3   7  -2    0.07    0.14
   3   7   2    0.22    0.06
   4  -7   2    2.73    0.16
   4   7   2    2.63    0.15
   4   7   2    2.41    0.22
  -4   7  -2    3.16    0.30
   5  -7   2    0.39    0.09
   5   7   2    0.34    0.09
  -5   7  -2    0.07    0.21
   5   7   2    0.30    0.17
   5  -8  -2    1.97    0.17
   5   8  -2    1.84    0.16
  -5   8   2    1.95    0.29
   5   8  -2    2.14    0.21
   4  -8  -2   -0.05    0.07
   4   8  -2    0.02    0.10
   4   8  -2    0.05    0.07
  -4   8   2    0.11    0.16
   3  -8  -2   11.88    0.33
   3  -8  -2   11.51    0.31
  -3   8   2   12.03    0.47
   3   8  -2   11.97    0.30
   3   8  -2   11.76    0.33
  -3   8   2   11.33    0.33
   3   8  -2   11.76    0.32
   2  -8  -2  122.51    2.32
   2  -8  -2  126.17    2.35
  -2   8   2  124.75    2.03
  -2   8   2  127.90    2.28
   2   8  -2  128.12    2.32
  -2   8   2  122.56    2.42
   2   8  -2  125.89    2.34
  -1  -8   2    9.11    0.25
  -1  -8   2   10.04    0.26
   1  -8  -2    9.64    0.27
   1   8  -2    9.95    0.29
  -1   8   2    9.58    0.29
   0  -8  -2  172.20    3.38
   0  -8   2  171.67    3.31
   0   8  -2  172.83    3.22
   0   8   2  171.74    3.31
  -1  -8  -2   20.31    0.44
   1  -8   2   20.08    0.46
   1  -8   2   20.21    0.35
   1   8   2   21.20    0.46
   1   8   2   20.00    0.47
  -1   8  -2   19.89    0.46
  -1   8  -2   19.95    0.48
   2  -8   2   13.45    0.36
   2  -8   2   12.89    0.29
   2  -8   2   12.83    0.34
   2   8   2   13.28    0.33
  -2   8  -2   13.28    0.42
   2   8   2   13.78    0.35
   3  -8   2   -0.01    0.06
   3  -8   2    0.04    0.06
   3  -8   2    0.07    0.08
   3   8   2    0.01    0.11
  -3   8  -2   -0.08    0.13
   3   8   2    0.08    0.05
   3   8   2    0.02    0.06
   4  -8   2    5.83    0.23
  -4   8  -2    5.87    0.37
   4   8   2    5.93    0.23
   4   8   2    5.82    0.32
   5  -8   2    0.05    0.08
   5   8   2    0.07    0.08
   5   8   2   -0.04    0.16
  -5   8  -2   -0.19    0.21
   5  -9  -2    4.82    0.23
  -5   9   2    5.04    0.38
   5   9  -2    5.19    0.29
   5   9  -2    4.86    0.23
   4  -9  -2    0.07    0.07
   4   9  -2    0.17    0.08
   4   9  -2    0.05    0.10
  -4   9   2    0.06    0.16
   3  -9  -2    2.57    0.15
   3  -9  -2    2.64    0.16
  -3   9   2    2.90    0.17
  -3   9   2    2.47    0.26
   3   9  -2    2.64    0.16
   3   9  -2    2.71    0.14
   3   9  -2    2.67    0.15
   2  -9  -2   14.23    0.36
  -2  -9   2   13.62    0.28
   2  -9  -2   13.98    0.38
  -2   9   2   12.71    0.44
   2   9  -2   12.93    0.37
   2   9  -2   13.82    0.35
  -2   9   2   13.25    0.33
  -2   9   2   13.08    0.31
  -1  -9   2  130.19    2.39
   1  -9  -2  131.82    2.41
   1   9  -2  128.94    2.43
  -1   9   2  127.28    2.41
   0  -9   2  103.60    1.93
   0  -9  -2  103.64    1.93
   0   9   2  102.18    1.96
   0   9  -2  102.09    1.96
   1  -9   2    6.93    0.23
  -1  -9  -2    7.18    0.22
   1  -9   2    7.37    0.15
   1   9   2    7.07    0.24
  -1   9  -2    6.83    0.24
   2  -9   2   45.03    0.77
   2  -9   2   45.14    0.93
   2  -9   2   43.96    0.91
   2   9   2   44.30    0.90
  -2   9  -2   44.08    0.98
   2   9   2   43.78    0.92
  -2   9  -2   45.08    0.84
   3  -9   2    1.72    0.14
   3  -9   2    1.83    0.16
   3  -9   2    1.50    0.13
   3   9   2    1.86    0.14
  -3   9  -2    1.43    0.21
   3   9   2    1.57    0.18
   3   9   2    1.75    0.13
   4  -9   2    9.10    0.29
   4   9   2    8.33    0.38
   4   9   2    8.95    0.30
  -4   9  -2    8.96    0.45
   5  -9   2    0.12    0.09
  -5   9  -2   -0.16    0.22
   5   9   2    0.07    0.16
   5   9   2    0.17    0.09
   5 -10  -2    0.44    0.11
  -5  10   2    0.68    0.22
   5  10  -2    0.61    0.11
   4 -10  -2    7.43    0.26
   4  10  -2    7.43    0.27
   4  10  -2    7.36    0.28
  -4  10   2    7.48    0.42
   3 -10  -2   -0.02    0.06
   3 -10  -2    0.01    0.07
   3  10  -2   -0.05    0.05
  -3  10   2   -0.01    0.07
   3  10  -2    0.02    0.07
  -3  10   2   -0.10    0.13
   3  10  -2   -0.03    0.07
  -2 -10   2  132.80    2.36
   2 -10  -2  131.43    2.47
   2 -10  -2  128.00    2.44
  -2  10   2  130.21    2.11
   2  10  -2  132.93    2.46
  -2  10   2  124.75    2.52
   2  10  -2  134.36    2.43
   1 -10  -2    3.86    0.17
  -1 -10   2    4.25    0.17
  -1  10   2    3.82    0.20
   1  10  -2    3.91    0.19
   0 -10   2    9.67    0.29
   0 -10  -2    9.78    0.29
   0  10   2    9.97    0.32
   0  10  -2    9.46    0.32
   1 -10   2    4.87    0.20
  -1 -10  -2    5.32    0.19
   1  10   2    5.27    0.22
  -1  10  -2    5.09    0.21
   2 -10   2  114.77    2.19
   2 -10   2  112.74    2.16
   2 -10   2  116.37    1.83
   2  10   2  119.11    2.15
  -2  10  -2  111.75    2.22
  -2  10  -2  114.27    2.10
   2  10   2  112.48    2.17
   3 -10   2    3.04    0.19
   3 -10   2    3.25    0.18
   3 -10   2    3.15    0.17
   3  10   2    3.28    0.18
   3  10   2    3.31    0.17
  -3  10  -2    3.37    0.30
   4 -10   2   14.44    0.41
   4  10   2   14.99    0.51
  -4  10  -2   14.49    0.58
   4  10   2   14.56    0.42
   5 -10   2    1.77    0.18
  -5  10  -2    1.57    0.30
   5  10   2    1.69    0.25
   5  10   2    1.80    0.18
   5 -11  -2    0.05    0.09
   5  11  -2    0.03    0.10
  -5  11   2    0.16    0.19
   4 -11  -2    0.12    0.08
  -4  11   2    0.20    0.19
   4  11  -2    0.16    0.11
   4  11  -2    0.20    0.10
   3 -11  -2    6.69    0.25
   3 -11  -2    7.65    0.29
  -3  11   2    7.35    0.26
  -3  11   2    6.75    0.39
   3  11  -2    7.02    0.27
   3  11  -2    6.84    0.24
   2 -11  -2   42.19    0.88
  -2 -11   2   41.73    0.81
  -2  11   2   41.80    0.98
   2  11  -2   42.17    0.90
  -2  11   2   40.26    0.77
   2  11  -2   43.33    0.87
  -1 -11   2    0.04    0.06
   1 -11  -2    0.00    0.06
  -1  11   2    0.01    0.07
   1  11  -2    0.08    0.06
   0 -11   2  103.00    1.94
   0 -11  -2  103.09    1.94
   0  11   2  100.71    1.97
   0  11  -2  103.00    1.98
   1 -11   2    0.41    0.09
  -1 -11  -2    0.58    0.08
  -1  11  -2    0.29    0.09
   2 -11   2   29.55    0.66
   2 -11   2   29.89    0.54
   2  11   2   31.07    0.66
  -2  11  -2   30.03    0.62
   2  11   2   29.36    0.68
  -2  11  -2   28.41    0.73
   3 -11   2    0.94    0.12
   3 -11   2    1.30    0.13
  -3  11  -2    1.38    0.22
   3  11   2    1.12    0.11
   3  11   2    1.36    0.14
   4 -11   2    2.41    0.18
   4  11   2    2.63    0.25
  -4  11  -2    2.55    0.30
   4  11   2    2.58    0.19
   5 -11   2    1.29    0.15
   5  11   2    1.30    0.15
  -5  11  -2    0.90    0.28
   5  11   2    1.31    0.23
   5 -12  -2    1.21    0.15
  -5  12   2    1.21    0.27
   5  12  -2    1.08    0.14
   4 -12  -2    1.04    0.12
   4  12  -2    0.73    0.13
  -4  12   2    0.79    0.21
   3 -12  -2    0.09    0.08
  -3  12   2   -0.17    0.15
   3  12  -2    0.13    0.09
  -3  12   2    0.16    0.09
   3  12  -2    0.30    0.08
  -2 -12   2    0.06    0.05
   2 -12  -2    0.08    0.07
  -2  12   2    0.08    0.05
  -2  12   2    0.02    0.06
   2  12  -2    0.04    0.08
   1 -12  -2    1.72    0.14
  -1 -12   2    1.65    0.13
  -1  12   2    1.78    0.15
   1  12  -2    1.63    0.16
   0 -12   2   24.61    0.57
   0 -12  -2   24.89    0.57
   0  12  -2   24.32    0.60
   0  12   2   24.59    0.60
   1 -12   2  140.68    2.64
  -1 -12  -2  143.68    2.62
  -1  12  -2  140.13    2.65
   1  12   2  138.51    2.67
  -2 -12  -2    6.80    0.19
   2 -12   2    6.85    0.20
   2 -12   2    6.60    0.26
   2  12   2    6.57    0.27
  -2  12  -2    6.40    0.35
   3 -12   2    0.77    0.12
   3 -12   2    0.85    0.12
  -3  12  -2    0.89    0.20
   3  12   2    0.88    0.12
   4 -12   2    2.33    0.20
  -4  12  -2    2.82    0.32
   4  12   2    2.52    0.19
   5 -12   2    4.17    0.24
   5  12   2    4.48    0.26
  -5  12  -2    3.90    0.39
   5 -13  -2    0.24    0.11
  -5  13   2    0.04    0.18
   5  13  -2    0.23    0.12
   4 -13  -2    1.16    0.14
  -4  13   2    1.38    0.25
   4  13  -2    1.06    0.15
   3 -13  -2    0.25    0.09
  -3  13   2   -0.07    0.08
   3  13  -2   -0.04    0.09
  -3  13   2    0.01    0.17
   2 -13  -2    0.11    0.07
  -2 -13   2    0.03    0.03
   2  13  -2    0.08    0.08
  -2  13   2    0.02    0.07
  -2  13   2    0.03    0.06
   1 -13  -2    7.79    0.27
  -1 -13   2    7.80    0.26
   1  13  -2    7.27    0.29
  -1  13   2    7.69    0.29
   0 -13   2   52.36    1.07
   0 -13  -2   52.77    1.07
   0 -13   2   52.40    1.08
   0  13   2   52.15    1.11
   0  13  -2   51.83    1.11
  -1 -13  -2   22.33    0.53
   1 -13   2   22.84    0.56
   1  13   2   21.98    0.58
  -1  13  -2   23.88    0.57
   2 -13   2   72.33    1.45
   2 -13   2   72.80    1.18
  -2 -13  -2   75.10    1.36
  -2  13  -2   70.96    1.51
   2  13   2   69.86    1.47
   3 -13   2    8.85    0.27
   3 -13   2    8.40    0.31
  -3  13  -2    8.25    0.42
   3  13   2    7.96    0.31
   4 -13   2    0.12    0.11
  -4  13  -2    0.27    0.21
   4  13   2    0.21    0.10
   5 -13   2    4.38    0.26
  -5  13  -2    4.81    0.46
   5  13   2    4.51    0.28
   5 -14  -2    0.40    0.12
  -5  14   2    0.38    0.23
   5  14  -2    0.27    0.13
   4 -14  -2    0.19    0.10
   4  14  -2   -0.05    0.11
  -4  14   2    0.17    0.18
   3 -14  -2   19.83    0.53
  -3  14   2   19.58    0.49
  -3  14   2   18.39    0.65
   3  14  -2   19.70    0.55
   2 -14  -2   26.66    0.64
   2  14  -2   27.20    0.68
  -2  14   2   26.28    0.55
  -2  14   2   28.06    0.63
  -1 -14   2   27.61    0.62
   1 -14  -2   26.92    0.64
  -1  14   2   27.00    0.66
   1  14  -2   27.55    0.68
   0 -14   2   13.96    0.40
   0 -14   2   13.84    0.40
   0 -14  -2   14.76    0.40
   0  14   2   14.11    0.43
   0  14  -2   13.79    0.42
   1 -14   2   25.57    0.62
  -1 -14  -2   26.00    0.60
   1  14   2   26.16    0.65
  -1  14  -2   25.95    0.63
   2 -14   2   14.78    0.42
  -2 -14  -2   14.87    0.35
  -2  14  -2   14.56    0.50
  -2  14  -2   11.99    0.36
   2  14   2   14.90    0.44
   3 -14   2    4.43    0.21
   3 -14   2    4.47    0.24
  -3  14  -2    5.21    0.36
   3  14   2    4.52    0.25
   4 -14   2    2.20    0.22
  -4  14  -2    2.62    0.32
   4  14   2    2.59    0.22
   5 -14   2    0.45    0.14
  -5  14  -2    0.48    0.27
   5  14   2    0.36    0.15
   5 -15  -2    0.20    0.12
   5  15  -2    0.26    0.13
  -5  15   2    0.29    0.21
   4 -15  -2    0.31    0.11
   4  15  -2    0.08    0.12
  -4  15   2    0.32    0.21
   3 -15  -2   99.96    1.95
  -3  15   2   98.38    1.71
  -3  15   2   97.08    2.10
   3  15  -2   99.74    1.99
  -2 -15   2   13.46    0.32
   2 -15  -2   13.10    0.40
   2  15  -2   13.34    0.43
  -2  15   2   13.09    0.34
  -2  15   2   13.23    0.39
   1 -15  -2   57.37    1.22
  -1 -15   2   61.77    1.21
   1  15  -2   59.08    1.27
  -1  15   2   59.69    1.25
   0 -15   2    6.48    0.26
   0 -15  -2    6.31    0.25
   0 -15   2    6.31    0.25
   0  15  -2    6.37    0.28
   0  15   2    6.02    0.28
  -1 -15  -2   35.54    0.79
   1 -15   2   36.53    0.81
  -1  15  -2   35.42    0.60
   1  15   2   34.76    0.84
  -1  15  -2   37.07    0.83
  -2 -15  -2    1.65    0.13
   2 -15   2    1.89    0.17
  -2  15  -2    1.64    0.23
  -2  15  -2    1.83    0.16
   2  15   2    1.45    0.16
   3 -15   2    2.84    0.20
   3 -15   2    2.34    0.18
   3  15   2    2.65    0.20
  -3  15  -2    2.51    0.28
   4 -15   2    0.06    0.12
  -4  15  -2    0.22    0.23
   4  15   2    0.40    0.13
   5 -15   2    9.94    0.39
   5  15   2    9.77    0.42
  -5  15  -2   10.91    0.60
   5 -16  -2    3.00    0.23
   5  16  -2    2.58    0.25
  -5  16   2    2.75    0.35
   4 -16  -2    2.49    0.21
  -4  16   2    2.15    0.30
   4  16  -2    2.33    0.24
   3 -16  -2   12.78    0.42
   3  16  -2   11.63    0.44
  -3  16   2   11.54    0.37
  -3  16   2   12.20    0.56
  -2 -16   2    4.18    0.18
  -2 -16   2    4.03    0.16
   2 -16  -2    4.24    0.24
  -2  16   2    4.24    0.19
   2  16  -2    3.99    0.25
  -2  16   2    4.24    0.24
   1 -16  -2    5.22    0.25
  -1 -16   2    6.23    0.24
   1  16  -2    4.77    0.26
  -1  16   2    4.72    0.25
   0 -16  -2   33.03    0.75
   0 -16   2   31.06    0.74
   0  16  -2   32.49    0.78
   0  16   2   31.81    0.78
  -1 -16  -2    1.03    0.13
   1 -16   2    0.88    0.13
  -1  16  -2    1.01    0.07
   1  16   2    1.07    0.15
   2 -16   2    7.77    0.31
  -2  16  -2    8.01    0.40
   2  16   2    7.19    0.32
  -2  16  -2    7.66    0.28
   3 -16   2    0.01    0.10
  -3  16  -2   -0.04    0.18
   3  16   2   -0.08    0.09
   4 -16   2    3.23    0.25
   4  16   2    4.31    0.28
  -4  16  -2    3.55    0.36
   5 -16   2    9.69    0.40
   5  16   2    9.96    0.43
  -5  16  -2   10.70    0.60
   5 -17  -2    2.00    0.21
  -5  17   2    1.87    0.31
   5  17  -2    2.04    0.22
   4 -17  -2    6.55    0.30
   4  17  -2    6.17    0.33
  -4  17   2    5.81    0.41
   3 -17  -2    9.44    0.37
  -3  17   2   10.39    0.52
  -3  17   2    9.52    0.33
   3  17  -2    9.62    0.40
   2 -17  -2   22.64    0.61
  -2 -17   2   22.41    0.52
  -2 -17   2   23.26    0.54
   2  17  -2   22.64    0.64
  -2  17   2   22.82    0.50
  -2  17   2   23.06    0.60
  -1 -17   2    4.98    0.24
   1 -17  -2    4.96    0.26
  -1  17   2    4.83    0.28
   1  17  -2    4.96    0.27
   0 -17  -2    1.24    0.14
   0 -17   2    1.17    0.14
   0  17   2    1.26    0.16
   0  17  -2    1.39    0.17
   1 -17   2    0.01    0.08
   1 -17   2    0.03    0.09
  -1 -17  -2   -0.01    0.08
  -1  17  -2   -0.03    0.09
  -1  17  -2   -0.06    0.04
   1  17   2   -0.07    0.09
   2 -17   2    0.12    0.10
  -2  17  -2    0.13    0.18
   2  17   2    0.03    0.10
  -2  17  -2    0.10    0.09
   3 -17   2    1.30    0.16
  -3  17  -2    1.18    0.23
   3  17   2    1.15    0.17
   4 -17   2    0.32    0.14
   4  17   2    0.57    0.15
  -4  17  -2    0.61    0.25
   4 -18  -2    0.11    0.12
  -4  18   2    0.05    0.19
   4  18  -2    0.11    0.13
   3 -18  -2   20.87    0.59
  -3  18   2   20.79    0.52
  -3  18   2   21.53    0.73
   3  18  -2   21.07    0.64
   2 -18  -2   27.52    0.71
   2  18  -2   27.14    0.74
  -2  18   2   26.42    0.58
  -2  18   2   28.15    0.69
   1 -18  -2    4.54    0.25
  -1 -18   2    4.78    0.25
  -1  18   2    4.78    0.29
   1  18  -2    5.05    0.30
   0 -18  -2    4.12    0.23
   0 -18   2    3.96    0.24
   0  18  -2    3.77    0.25
   0  18   2    4.32    0.28
  -1 -18  -2    2.47    0.19
   1 -18   2    2.34    0.19
   1 -18   2    2.14    0.19
   1  18   2    2.43    0.23
  -1  18  -2    2.28    0.09
  -1  18  -2    2.39    0.22
   2 -18   2    2.29    0.20
  -2  18  -2    2.23    0.27
   2  18   2    2.39    0.22
   3 -18   2    8.80    0.36
  -3  18  -2    8.69    0.47
   3  18   2    7.94    0.37
   4 -18   2    0.16    0.13
   4  18   2    0.18    0.13
  -4  18  -2   -0.08    0.23
   4 -19  -2    2.27    0.23
   4  19  -2    1.98    0.23
  -4  19   2    2.34    0.33
   3 -19  -2    0.13    0.11
  -3  19   2    0.04    0.21
  -3  19   2   -0.01    0.10
   3  19  -2    0.04    0.13
   2 -19  -2   29.76    0.76
  -2  19   2   29.18    0.62
  -2  19   2   30.68    0.75
   2  19  -2   29.36    0.80
   1 -19  -2   35.42    0.87
  -1 -19   2   37.47    0.85
  -1  19   2   36.96    0.91
   1  19  -2   37.68    0.93
   0 -19   2    1.43    0.16
   0 -19  -2    1.13    0.16
   0  19  -2    1.39    0.18
   0  19   2    1.30    0.19
   1 -19   2    0.00    0.10
   1 -19   2    0.04    0.10
  -1 -19  -2   -0.11    0.09
   1  19   2    0.13    0.12
  -1  19  -2    0.00    0.04
  -1  19  -2    0.09    0.12
   2 -19   2    1.49    0.17
   2 -19   2    1.79    0.18
  -2  19  -2    2.05    0.27
   2  19   2    1.66    0.19
   3 -19   2    7.22    0.34
   3  19   2    7.36    0.36
  -3  19  -2    8.14    0.47
   4 -19   2    1.74    0.20
   4 -19   2    1.97    0.21
   4  19   2    1.78    0.22
  -4  19  -2    1.55    0.31
   4 -20  -2    0.73    0.15
  -4  20   2    0.40    0.22
   4  20  -2    0.60    0.16
   3 -20  -2    4.14    0.27
  -3  20   2    4.57    0.23
   3  20  -2    4.56    0.32
  -3  20   2    4.30    0.37
   2 -20  -2   12.93    0.46
  -2  20   2   13.02    0.37
   2  20  -2   13.47    0.51
   1 -20  -2   38.06    0.93
  -1 -20   2   40.08    0.91
   1  20  -2   39.66    0.99
  -1  20   2   39.94    0.97
   0 -20   2    0.03    0.11
   0 -20  -2   -0.13    0.11
   0  20  -2    0.11    0.13
   0  20   2   -0.17    0.12
  -1 -20  -2    8.99    0.34
   1 -20   2    9.11    0.37
  -1  20  -2    8.93    0.39
  -1  20  -2    9.01    0.21
   1  20   2    9.42    0.41
   2 -20   2    0.07    0.12
   2 -20   2   -0.25    0.10
  -2  20  -2    0.11    0.18
   2  20   2    0.06    0.12
   3 -20   2    0.14    0.13
   3 -20   2   -0.35    0.11
   3  20   2    0.21    0.15
  -3  20  -2    0.15    0.22
   4 -20   2    0.20    0.14
   4 -20   2    0.42    0.16
  -4  20  -2    0.37    0.26
   4  20   2    0.15    0.15
   4 -21  -2    0.45    0.14
  -4  21   2    0.65    0.25
   4  21  -2    0.46    0.17
   3 -21  -2    0.17    0.12
   3  21  -2   -0.10    0.13
  -3  21   2    0.01    0.20
  -3  21   2    0.24    0.11
   2 -21  -2    0.27    0.13
  -2  21   2    0.04    0.09
   2  21  -2   -0.09    0.13
  -1 -21   2   12.38    0.42
   1 -21  -2   12.12    0.45
  -1  21   2   11.68    0.48
   1  21  -2   11.68    0.49
   0 -21   2    2.83    0.22
   0 -21  -2    2.12    0.22
   0  21   2    2.46    0.26
   0  21  -2    3.08    0.28
   1 -21   2    0.22    0.12
  -1 -21  -2    0.26    0.11
   1  21   2    0.34    0.15
  -1  21  -2    0.38    0.15
  -1  21  -2    0.29    0.06
   2 -21   2    0.64    0.15
   2 -21   2    0.35    0.15
   2  21   2    0.55    0.16
  -2  21  -2    0.57    0.22
   3 -21   2    3.62    0.28
   3 -21   2    3.95    0.29
   3  21   2    4.23    0.32
  -3  21  -2    4.51    0.39
   4 -21   2   10.43    0.43
   4 -21   2   10.31    0.44
  -4  21  -2   11.10    0.57
   4  21   2   10.43    0.48
   4 -22  -2    0.08    0.13
   4  22  -2    0.25    0.15
  -4  22   2    0.24    0.23
   3 -22  -2    1.58    0.19
  -3  22   2    1.31    0.28
   3  22  -2    1.57    0.22
  -3  22   2    1.71    0.17
   2 -22  -2   21.48    0.63
  -2  22   2   21.63    0.50
   2  22  -2   20.91    0.67
   1 -22  -2    5.62    0.34
  -1 -22   2    7.01    0.32
   1  22  -2    6.18    0.36
  -1  22   2    5.85    0.37
   0 -22  -2    1.59    0.20
   0 -22   2    1.99    0.20
   0  22  -2    1.88    0.22
   0  22   2    1.75    0.23
  -1 -22  -2    0.29    0.13
   1 -22   2    0.29    0.13
  -1  22  -2    0.50    0.06
   1  22   2    0.35    0.15
  -1  22  -2    0.65    0.16
   2 -22   2    1.30    0.19
   2  22   2    1.38    0.21
  -2  22  -2    1.27    0.26
   3 -22   2   28.00    0.77
   3 -22   2   27.54    0.78
  -3  22  -2   30.02    0.92
   3  22   2   27.23    0.81
   4 -22   2    9.98    0.44
   4 -22   2   10.00    0.44
  -4  22  -2   11.75    0.61
   4  22   2    9.82    0.48
   4 -23  -2    0.24    0.14
  -4  23   2    0.30    0.24
   4  23  -2    0.00    0.15
   3 -23  -2    1.32    0.19
  -3  23   2    1.00    0.27
   3  23  -2    1.18    0.20
  -3  23   2    0.94    0.14
   2 -23  -2    0.97    0.17
  -2  23   2    0.82    0.12
   2  23  -2    0.86    0.19
  -1 -23   2    7.81    0.35
   1 -23  -2    7.68    0.38
  -1  23   2    7.23    0.40
   1  23  -2    7.92    0.42
   0 -23  -2    0.38    0.16
   0 -23   2    0.65    0.16
   0  23  -2    0.75    0.18
   0  23   2    0.35    0.16
  -1 -23  -2    0.28    0.14
   1 -23   2    0.36    0.14
   1  23   2    0.18    0.15
  -1  23  -2    0.34    0.15
  -1  23  -2    0.41    0.06
   2 -23   2    2.28    0.24
  -2  23  -2    2.54    0.31
   2  23   2    2.74    0.28
   3 -23   2    0.84    0.18
   3  23   2    1.00    0.20
  -3  23  -2    0.98    0.28
   3 -24  -2    0.28    0.14
   3  24  -2    0.17    0.16
  -3  24   2    0.08    0.24
  -3  24   2    0.44    0.12
   2 -24  -2    0.26    0.13
  -2  24   2    0.30    0.10
   2  24  -2    0.22    0.17
  -1 -24   2    0.76    0.16
   1 -24  -2    0.55    0.15
  -1  24   2    0.79    0.19
   1  24  -2    0.39    0.17
   0 -24   2   17.32    0.56
   0 -24  -2   17.05    0.56
   0  24   2   17.60    0.60
   0  24  -2   17.17    0.61
   1 -24   2    3.19    0.27
  -1 -24  -2    3.25    0.27
  -1  24  -2    3.10    0.30
   1  24   2    3.11    0.31
   2 -24   2    0.06    0.12
   2  24   2    0.03    0.15
   3 -24   2    1.04    0.19
   3  24   2    0.93    0.21
  -3  24  -2    1.08    0.29
   3 -25  -2   -0.09    0.12
  -3  25   2    0.10    0.10
  -3  25   2   -0.01    0.22
   3  25  -2   -0.10    0.14
   2 -25  -2   -0.06    0.13
   2  25  -2   -0.14    0.15
  -2  25   2   -0.08    0.09
  -1 -25   2    3.37    0.27
   1 -25  -2    3.40    0.28
  -1  25   2    3.83    0.32
   1  25  -2    3.08    0.32
   0 -25  -2    4.79    0.32
   0 -25   2    4.98    0.32
   0  25   2    4.68    0.34
   0  25  -2    4.76    0.36
   1 -25   2    0.25    0.14
   1  25   2    0.19    0.16
  -1  25  -2    0.34    0.17
   2 -25   2    6.37    0.36
   2  25   2    6.48    0.40
   3 -25   2   -0.01    0.14
   3  25   2    0.07    0.16
  -3  25  -2    0.11    0.25
   3 -26  -2    0.47    0.17
  -3  26   2    0.57    0.13
   3  26  -2    0.32    0.19
  -3  26   2    0.50    0.28
   2 -26  -2    1.55    0.22
  -2  26   2    1.73    0.16
   2  26  -2    1.55    0.24
   1 -26  -2    0.20    0.14
  -1  26   2    0.22    0.17
   1  26  -2    0.16    0.18
   0 -26   2    0.38    0.16
   0 -26  -2    0.73    0.18
   0  26   2    0.38    0.18
   0  26  -2    0.45    0.18
   1 -26   2   -0.12    0.14
   1  26   2   -0.07    0.17
  -1  26  -2    0.10    0.16
   2 -26   2    1.01    0.19
   2  26   2    1.15    0.22
   3 -26   2    0.32    0.16
  -3  26  -2    0.23    0.26
   3  26   2    0.17    0.18
   3 -27  -2    2.85    0.27
   3  27  -2    2.56    0.30
  -3  27   2    2.74    0.21
  -3  27   2    2.38    0.37
   2 -27  -2    2.09    0.24
   2  27  -2    3.35    0.34
  -2  27   2    2.40    0.20
   1 -27  -2    1.72    0.23
   1  27  -2    1.24    0.24
  -1  27   2    1.65    0.16
  -1  27   2    2.13    0.26
   0 -27  -2    2.97    0.29
   0 -27   2    2.27    0.24
   0  27   2    2.04    0.27
   0  27  -2    3.01    0.31
   1 -27   2    1.07    0.21
   1  27   2    1.45    0.24
   2 -27   2    0.47    0.18
   2  27   2    0.36    0.18
   3 -27   2    0.14    0.16
  -3  27  -2    0.03    0.23
   3  27   2   -0.12    0.16
   2 -28  -2    0.22    0.16
  -2  28   2    0.07    0.11
   2  28  -2    0.22    0.19
   1 -28  -2    0.08    0.15
  -1  28   2    0.25    0.18
   1  28  -2    0.29    0.19
  -1  28   2    0.00    0.11
   0 -28   2    0.24    0.16
   0 -28  -2    0.43    0.17
   0  28   2    0.40    0.20
   0  28  -2    0.15    0.19
   1 -28   2   -0.04    0.15
   1  28   2    0.04    0.18
   2 -28   2    0.07    0.16
   2  28   2    0.21    0.19
   2 -29  -2    0.03    0.16
   2  29  -2   -0.01    0.18
   1 -29  -2    2.41    0.27
  -1  29   2    2.35    0.20
   1  29  -2    2.46    0.31
   0 -29   2    0.16    0.15
   0 -29  -2    0.14    0.15
   0  29  -2   -0.10    0.18
   0  29   2    0.07    0.18
   1 -29   2   -0.02    0.15
   1  29   2    0.21    0.19
   2 -29   2    0.60    0.18
   2  29   2    0.59    0.22
   2 -30  -2    0.28    0.19
   2  30  -2    0.23    0.20
   1 -30  -2    0.45    0.19
   1  30  -2    0.62    0.23
   0 -30  -2    0.22    0.18
   0 -30   2    0.40    0.18
   0  30   2    0.51    0.22
   0  30  -2    0.36    0.20
   1 -30   2    1.11    0.22
   1  30   2    0.83    0.24
   1 -31  -2    0.28    0.19
   1  31  -2    0.49    0.23
   0 -31   2    0.19    0.17
   0  31   2   -0.01    0.20
   0  31  -2    0.07    0.20
   1 -31   2    0.18    0.17
   1  31   2    0.24    0.22
  -5   0   3   -0.16    0.19
   4   0  -3   -0.15    0.06
  -4   0   3   -0.05    0.15
   4   0  -3   -0.13    0.06
   3   0  -3   -0.05    0.04
   3   0  -3   -0.02    0.05
  -3   0   3   -0.06    0.10
   2   0  -3    0.14    0.06
   2   0  -3   -0.12    0.04
   2   0  -3   -0.09    0.05
  -2   0   3   -0.01    0.06
  -2   0   3   -0.14    0.07
   1   0  -3   -0.08    0.03
  -1   0   3   -0.03    0.05
   1   0  -3   -0.03    0.04
  -1   0   3   -0.06    0.03
  -1   0   3   -0.01    0.04
   0   0   3   -0.13    0.04
   0   0  -3   -0.04    0.05
   0   0  -3    0.01    0.06
   1   0   3   -0.20    0.07
   1   0   3   -0.02    0.09
   2   0   3    0.13    0.11
   2   0   3    0.93    0.12
  -3   0  -3    0.12    0.15
   3   0   3   -0.06    0.11
   3   0   3   -0.02    0.05
   3   0   3    0.01    0.05
   4   0   3    0.02    0.06
  -4   0  -3    0.04    0.19
   4   0   3   -0.09    0.14
   5   0   3   -0.04    0.08
   5   0   3    0.15    0.18
   5  -1  -3    0.21    0.09
  -5  -1   3    0.00    0.19
   5   1  -3    0.02    0.08
  -5   1   3    0.21    0.22
   4  -1  -3    1.34    0.13
   4  -1  -3    1.24    0.12
  -4  -1   3    1.20    0.22
   4   1  -3    1.26    0.10
   4   1  -3    1.20    0.11
  -4   1   3    1.10    0.22
  -3  -1   3    3.93    0.24
   3  -1  -3    4.18    0.15
   3  -1  -3    4.27    0.16
  -3   1   3    4.12    0.25
   3   1  -3    4.29    0.15
   3   1  -3    4.13    0.16
  -2  -1   3    2.75    0.14
   2  -1  -3    2.86    0.15
  -2  -1   3    2.75    0.19
   2  -1  -3    2.76    0.14
   2  -1  -3    2.79    0.13
   2   1  -3    2.20    0.13
  -2   1   3    2.64    0.19
   2   1  -3    2.59    0.14
   2   1  -3    2.66    0.13
  -2   1   3    2.58    0.14
  -1  -1   3   31.64    0.64
  -1  -1   3   31.43    0.64
   1  -1  -3   32.15    0.65
   1  -1  -3   32.22    0.66
  -1  -1   3   31.09    0.55
  -1   1   3   31.18    0.65
   1   1  -3   32.51    0.64
   1   1  -3   31.33    0.65
  -1   1   3   31.91    0.56
  -1   1   3   32.35    0.64
   1   1  -3   31.95    0.65
   0  -1  -3  338.40    6.97
   0  -1   3  351.63    6.62
   0  -1  -3  359.04    6.63
   0   1  -3  344.05    6.52
   0   1   3  337.72    6.53
   0   1  -3  344.50    6.93
   1  -1   3  354.94    6.64
   1  -1   3  368.64    6.77
   1  -1   3  358.55    6.81
   1   1   3  375.40    6.75
   1   1   3  355.02    6.67
   1   1   3  357.65    6.84
   1   1   3  355.51    7.50
   2  -1   3  477.87   10.00
   2  -1   3  503.24    9.14
   2  -1   3  498.51    9.25
   2   1   3  498.00   10.06
  -2   1  -3  501.22    9.20
   2   1   3  493.87    9.22
   2   1   3  503.50    9.16
  -3  -1  -3    2.56    0.25
   3  -1   3    2.26    0.13
   3  -1   3    2.08    0.13
   3  -1   3    2.01    0.20
   3   1   3    2.27    0.13
   3   1   3    1.93    0.20
  -3   1  -3    1.93    0.21
   3   1   3    2.16    0.13
   4  -1   3   -0.07    0.14
   4  -1   3    0.07    0.06
   4   1   3   -0.09    0.12
   4   1   3    0.09    0.06
  -4   1  -3   -0.13    0.17
   5  -1   3    2.73    0.27
   5  -1   3    2.49    0.17
   5   1   3    2.63    0.17
   5   1   3    2.61    0.27
  -5   1  -3    2.75    0.36
  -5  -2   3    1.34    0.27
   5  -2  -3    1.84    0.15
   5   2  -3    1.29    0.13
  -5   2   3    1.55    0.28
   4  -2  -3   18.26    0.42
  -4  -2   3   18.70    0.62
   4   2  -3   18.06    0.41
   4   2  -3   17.82    0.42
  -4   2   3   17.54    0.62
   3  -2  -3    4.58    0.17
  -3  -2   3    4.81    0.27
   3  -2  -3    4.59    0.17
   3   2  -3    4.51    0.16
  -3   2   3    4.31    0.28
   3   2  -3    4.80    0.17
  -2  -2   3   18.70    0.48
   2  -2  -3   19.67    0.41
   2  -2  -3   19.55    0.43
   2  -2  -3   19.40    0.43
   2   2  -3   18.78    0.40
  -2   2   3   18.67    0.50
   2   2  -3   19.14    0.43
  -2   2   3   19.43    0.41
   2   2  -3   18.90    0.42
   1  -2  -3   11.12    0.28
  -1  -2   3   10.77    0.27
   1  -2  -3   10.93    0.28
  -1  -2   3   11.01    0.24
  -1  -2   3   10.88    0.26
   1   2  -3   10.81    0.29
   1   2  -3   10.80    0.27
   1   2  -3   10.49    0.28
  -1   2   3   11.27    0.30
  -1   2   3   10.97    0.28
   1   2  -3   10.96    0.23
  -1   2   3   10.85    0.25
   0  -2  -3   49.55    0.97
   0  -2   3   49.64    0.97
   0  -2   3   48.76    1.00
   0   2   3   49.26    0.97
   0   2  -3   48.69    0.97
   0   2  -3   48.34    1.00
   1  -2   3  463.36    8.45
   1  -2   3  472.57    8.57
   1  -2   3  448.23    8.60
   1  -2   3  451.85    9.30
   1   2   3  446.09    9.32
  -1   2  -3  465.80    8.52
   1   2   3  475.14    8.56
  -1   2  -3  444.85    8.50
   1   2   3  465.10    8.68
   2  -2   3  328.33    5.88
   2  -2   3  305.80    5.68
   2  -2   3  299.07    6.03
   2   2   3  311.71    5.68
   2   2   3  308.14    5.86
  -2   2  -3  309.93    5.77
   2   2   3  300.34    6.32
   3  -2   3    2.68    0.22
   3  -2   3    3.18    0.16
   3  -2   3    3.15    0.15
   3   2   3    3.63    0.15
  -3   2  -3    3.08    0.26
   3   2   3    2.92    0.15
   3   2   3    3.17    0.23
   4  -2   3    0.33    0.16
  -4   2  -3    0.08    0.19
   4   2   3    0.01    0.13
   4   2   3    0.18    0.07
   5  -2   3    4.63    0.21
   5  -2   3    4.88    0.35
   5   2   3    4.78    0.22
   5   2   3    4.83    0.34
  -5   2  -3    4.47    0.41
  -5  -3   3   10.99    0.54
   5  -3  -3   11.45    0.32
  -5   3   3   11.11    0.54
   5   3  -3   10.35    0.31
  -4  -3   3   17.37    0.59
   4  -3  -3   16.87    0.41
  -4   3   3   17.26    0.61
   4   3  -3   17.23    0.41
   3  -3  -3    7.92    0.23
  -3  -3   3    7.87    0.34
   3  -3  -3    7.77    0.23
   3   3  -3    7.79    0.23
   3   3  -3    7.99    0.22
  -3   3   3    7.43    0.34
  -2  -3   3   58.78    1.19
   2  -3  -3   59.44    1.14
   2  -3  -3   59.89    1.15
   2  -3  -3   59.00    1.01
  -2   3   3   58.74    1.03
  -2   3   3   58.44    1.22
   2   3  -3   59.78    1.15
   2   3  -3   60.34    1.01
   2   3  -3   59.25    1.14
   1  -3  -3  420.66    7.73
   1  -3  -3  412.70    7.75
  -1  -3   3  408.53    6.59
  -1  -3   3  409.29    7.66
  -1  -3   3  406.76    7.52
  -1   3   3  401.17    6.65
   1   3  -3  403.70    6.52
  -1   3   3  416.12    7.72
   1   3  -3  413.09    7.84
   1   3  -3  410.23    7.68
   1   3  -3  414.98    7.52
   0  -3   3  133.53    2.81
   0  -3   3  135.57    2.59
   0  -3  -3  136.43    2.66
   0   3  -3  135.73    2.63
   0   3  -3  136.39    2.54
   0   3   3  134.48    2.63
   1  -3   3   16.10    0.38
   1  -3   3   15.93    0.38
   1  -3   3   15.67    0.37
   1   3   3   14.17    0.39
  -1   3  -3   15.22    0.36
  -1   3  -3   16.33    0.37
   1   3   3   15.28    0.38
   2  -3   3   93.17    1.75
   2  -3   3   90.29    1.94
   2  -3   3   94.49    1.76
   2   3   3   94.35    1.94
   2   3   3   92.55    1.75
   2   3   3   92.10    1.75
  -2   3  -3   93.90    1.81
   3  -3   3    0.51    0.08
   3  -3   3    0.45    0.08
   3  -3   3    0.24    0.15
   3   3   3    0.42    0.08
   3   3   3    0.36    0.07
   3   3   3    0.57    0.15
  -3   3  -3    0.69    0.16
   4  -3   3    0.76    0.18
   4  -3   3    0.87    0.10
   4   3   3    0.80    0.18
  -4   3  -3    0.68    0.20
   4   3   3    0.80    0.09
   5  -3   3    2.20    0.17
   5  -3   3    2.36    0.29
   5   3   3    1.72    0.17
   5   3   3    2.08    0.27
  -5   3  -3    1.51    0.31
   5  -4  -3    5.79    0.23
  -5  -4   3    6.31    0.42
   5   4  -3    5.63    0.32
  -5   4   3    5.88    0.43
   5   4  -3    5.48    0.24
   4  -4  -3    6.08    0.22
  -4  -4   3    5.72    0.39
  -4   4   3    6.35    0.37
   4   4  -3    6.56    0.22
   3  -4  -3   16.67    0.40
  -3  -4   3   16.96    0.52
   3  -4  -3   17.26    0.41
   3   4  -3   16.57    0.40
  -3   4   3   16.66    0.52
   3   4  -3   17.22    0.39
  -2  -4   3  410.54    7.81
   2  -4  -3  415.46    6.48
   2  -4  -3  417.22    7.82
   2  -4  -3  422.52    7.77
  -2   4   3  419.87    7.02
  -2   4   3  409.70    8.00
   2   4  -3  409.84    6.57
  -2   4   3  419.01    7.52
   2   4  -3  417.97    7.84
   2   4  -3  417.82    7.67
   1  -4  -3   65.23    1.27
  -1  -4   3   65.77    1.25
  -1  -4   3   64.99    1.06
   1  -4  -3   66.93    1.27
   1   4  -3   65.42    1.06
   1   4  -3   66.69    1.28
   1   4  -3   65.76    1.26
  -1   4   3   65.72    1.08
   1   4  -3   65.87    1.23
  -1   4   3   65.91    1.26
   0  -4   3  186.35    3.53
   0  -4  -3  183.90    3.51
   0  -4   3  182.91    3.75
   0   4   3  183.28    3.48
   0   4  -3  183.55    3.37
  -1  -4  -3   35.59    0.74
   1  -4   3   37.53    0.84
   1  -4   3   37.76    0.77
   1  -4   3   37.98    0.75
   1  -4   3   37.73    0.77
  -1   4  -3   37.32    0.75
  -1   4  -3   37.41    0.76
   1   4   3   38.55    0.76
   1   4   3   36.91    0.78
   2  -4   3   77.69    1.47
   2  -4   3   77.69    1.48
   2   4   3   75.04    1.48
   2   4   3   77.76    1.64
  -2   4  -3   75.72    1.52
   2   4   3   78.39    1.47
   3  -4   3    5.12    0.19
   3  -4   3    5.30    0.20
  -3   4  -3    4.78    0.29
   3   4   3    5.31    0.19
   3   4   3    5.24    0.19
   3   4   3    5.12    0.27
   4  -4   3    1.38    0.22
   4  -4   3    1.11    0.11
  -4   4  -3    0.99    0.23
   4   4   3    1.26    0.21
   4   4   3    1.28    0.13
   5  -4   3    2.20    0.17
   5  -4   3    2.62    0.30
   5   4   3    2.53    0.29
  -5   4  -3    2.38    0.33
   5   4   3    1.87    0.17
   5  -5  -3    7.15    0.26
  -5   5   3    6.13    0.42
   5   5  -3    7.28    0.34
   5   5  -3    6.62    0.26
   4  -5  -3    1.31    0.12
  -4  -5   3    1.49    0.26
  -4   5   3    1.80    0.25
   4   5  -3    1.82    0.15
  -3  -5   3    2.65    0.25
   3  -5  -3    2.85    0.15
   3  -5  -3    2.90    0.16
  -3   5   3    2.82    0.17
   3   5  -3    2.88    0.14
  -3   5   3    2.79    0.24
   3   5  -3    2.80    0.15
  -2  -5   3   58.84    1.20
   2  -5  -3   59.13    1.16
   2  -5  -3   59.91    1.17
   2  -5  -3   58.71    1.02
   2   5  -3   59.77    1.16
  -2   5   3   57.47    1.23
  -2   5   3   59.89    1.04
  -2   5   3   59.89    1.10
   2   5  -3   59.23    1.01
   2   5  -3   60.47    1.15
  -1  -5   3   56.63    1.07
   1  -5  -3   55.43    1.08
   1   5  -3   55.77    1.09
   1   5  -3   54.95    1.05
   1   5  -3   54.82    1.06
   1   5  -3   54.34    0.89
  -1   5   3   54.26    1.08
   0  -5   3   23.41    0.50
   0  -5  -3   22.27    0.50
   0  -5   3   22.30    0.49
   0   5  -3   23.05    0.52
   0   5   3   21.97    0.51
   1  -5   3    1.11    0.10
   1  -5   3    1.18    0.11
  -1  -5  -3    0.99    0.09
   1   5   3    0.84    0.09
  -1   5  -3    1.12    0.11
  -1   5  -3    1.08    0.10
   1   5   3    1.04    0.09
   2  -5   3   12.27    0.33
   2  -5   3   11.42    0.31
  -2   5  -3   11.81    0.37
   2   5   3   12.23    0.39
   2   5   3   11.07    0.33
   2   5   3   11.10    0.32
   3  -5   3    0.16    0.06
   3  -5   3    0.20    0.07
   3   5   3    0.14    0.12
   3   5   3    0.14    0.06
   3   5   3    0.09    0.07
  -3   5  -3    0.32    0.15
   4  -5   3    1.73    0.15
   4  -5   3    1.71    0.23
   4   5   3    1.82    0.22
  -4   5  -3    1.38    0.24
   4   5   3    1.89    0.15
   5  -5   3    4.09    0.21
   5  -5   3    4.18    0.34
  -5   5  -3    3.37    0.38
   5   5   3    3.98    0.32
   5   5   3    3.74    0.21
   5  -6  -3    0.81    0.12
   5   6  -3    0.91    0.17
   5   6  -3    0.68    0.12
  -5   6   3    0.91    0.25
   4  -6  -3   24.57    0.57
   4   6  -3   26.10    0.64
  -4   6   3   24.80    0.76
   4   6  -3   25.22    0.57
  -3  -6   3    5.86    0.30
   3  -6  -3    5.85    0.22
   3  -6  -3    5.98    0.21
   3   6  -3    5.93    0.20
  -3   6   3    5.43    0.31
   3   6  -3    5.69    0.21
  -3   6   3    6.08    0.24
  -2  -6   3    6.35    0.16
   2  -6  -3    6.99    0.23
   2  -6  -3    7.00    0.24
  -2   6   3    6.46    0.22
   2   6  -3    7.08    0.21
   2   6  -3    7.01    0.24
  -2   6   3    7.42    0.32
   2   6  -3    6.54    0.21
  -2   6   3    6.79    0.19
  -1  -6   3  363.38    6.74
   1  -6  -3  354.76    6.81
  -1   6   3  359.88    6.81
   1   6  -3  359.25    6.58
   1   6  -3  356.69    6.94
   1   6  -3  354.96    5.66
   0  -6   3   29.64    0.47
   0  -6   3   29.93    0.63
   0  -6   3   29.29    0.63
   0  -6  -3   29.24    0.63
   0   6   3   29.09    0.64
   0   6  -3   30.07    0.65
   1  -6   3    9.03    0.26
  -1  -6  -3    8.90    0.25
   1   6   3    9.32    0.28
  -1   6  -3    9.03    0.27
  -1   6  -3    9.21    0.27
   1   6   3    8.96    0.26
   2  -6   3    1.78    0.14
   2  -6   3    1.76    0.13
  -2   6  -3    1.80    0.19
   2   6   3    1.64    0.17
   2   6   3    1.30    0.12
   2   6   3    1.52    0.11
   3  -6   3    0.76    0.09
   3  -6   3    0.87    0.10
   3   6   3    0.91    0.16
   3   6   3    0.65    0.09
  -3   6  -3    0.71    0.17
   3   6   3    0.80    0.09
   4  -6   3    1.42    0.15
  -4   6  -3    1.26    0.24
   4   6   3    1.33    0.20
   4   6   3    1.63    0.15
   5  -6   3    0.84    0.12
   5  -6   3    0.95    0.23
   5   6   3    1.07    0.21
  -5   6  -3    1.25    0.28
   5   6   3    0.97    0.13
   5  -7  -3   12.82    0.37
   5   7  -3   12.16    0.37
  -5   7   3   12.18    0.56
   5   7  -3   12.83    0.43
   4  -7  -3    1.66    0.17
   4   7  -3    2.19    0.17
   4   7  -3    1.92    0.16
  -4   7   3    1.92    0.25
   3  -7  -3    7.50    0.25
   3  -7  -3    6.99    0.24
  -3   7   3    6.66    0.26
  -3   7   3    5.97    0.33
   3   7  -3    6.77    0.22
   3   7  -3    7.35    0.23
   3   7  -3    7.30    0.25
   2  -7  -3    4.96    0.19
  -2  -7   3    4.86    0.14
   2  -7  -3    4.97    0.20
   2   7  -3    4.93    0.19
  -2   7   3    4.75    0.26
  -2   7   3    4.96    0.19
   2   7  -3    4.92    0.13
   2   7  -3    5.16    0.17
   2   7  -3    4.91    0.20
   1  -7  -3   98.23    1.85
  -1  -7   3   97.36    1.83
   1   7  -3   98.03    1.87
   1   7  -3   97.28    1.53
   1   7  -3   97.42    1.81
  -1   7   3   97.64    1.85
   0  -7  -3   35.11    0.74
   0  -7   3   35.44    0.74
   0   7   3   34.43    0.75
   0   7  -3   35.36    0.76
  -1  -7  -3   18.83    0.43
   1  -7   3   18.56    0.45
  -1   7  -3   18.60    0.45
  -1   7  -3   18.71    0.44
   1   7   3   19.46    0.47
   2  -7   3    0.09    0.06
   2  -7   3    0.01    0.06
   2   7   3   -0.04    0.05
   2   7   3   -0.05    0.06
   2   7   3    0.12    0.09
  -2   7  -3    0.13    0.10
   3  -7   3    0.31    0.08
   3  -7   3    0.32    0.08
   3   7   3    0.26    0.07
   3   7   3    0.15    0.08
  -3   7  -3    0.08    0.15
   3   7   3    0.35    0.14
   4  -7   3   10.89    0.34
   4   7   3   11.27    0.45
   4   7   3   11.71    0.35
  -4   7  -3   11.60    0.51
   5  -7   3    0.01    0.09
   5  -7   3    0.04    0.18
   5   7   3   -0.07    0.09
  -5   7  -3   -0.16    0.23
   5   7   3    0.07    0.17
   5  -8  -3    0.20    0.10
   5   8  -3    0.21    0.10
  -5   8   3    0.61    0.22
   4  -8  -3    0.42    0.11
   4   8  -3    0.81    0.11
  -4   8   3    0.89    0.20
   4   8  -3    0.94    0.13
   3  -8  -3    4.57    0.21
   3  -8  -3    4.60    0.20
   3   8  -3    4.71    0.17
   3   8  -3    4.63    0.20
  -3   8   3    4.61    0.32
   3   8  -3    4.91    0.19
  -3   8   3    4.23    0.20
   2  -8  -3   11.97    0.34
  -2  -8   3   11.82    0.27
   2  -8  -3   11.91    0.33
  -2   8   3   11.76    0.42
   2   8  -3   11.41    0.34
  -2   8   3   12.00    0.31
   2   8  -3   11.84    0.32
   2   8  -3   12.26    0.29
   1  -8  -3   74.25    1.46
  -1  -8   3   75.81    1.44
   1   8  -3   74.67    1.20
   1   8  -3   76.94    1.48
  -1   8   3   74.43    1.46
   0  -8   3    1.56    0.14
   0  -8  -3    1.78    0.13
   0   8   3    1.47    0.14
   0   8  -3    1.54    0.17
   1  -8   3    3.01    0.16
  -1  -8  -3    2.81    0.15
  -1   8  -3    2.81    0.17
  -1   8  -3    2.95    0.18
   1   8   3    2.97    0.17
   2  -8   3    1.65    0.14
   2  -8   3    1.90    0.16
   2   8   3    1.57    0.14
  -2   8  -3    1.73    0.17
  -2   8  -3    1.55    0.10
   2   8   3    1.57    0.14
   3  -8   3    3.45    0.18
   3  -8   3    3.46    0.19
   3  -8   3    3.50    0.20
  -3   8  -3    3.57    0.27
   3   8   3    3.63    0.25
   3   8   3    3.31    0.18
   3   8   3    3.52    0.19
   4  -8   3    0.64    0.11
   4   8   3    0.80    0.12
  -4   8  -3    1.02    0.23
   4   8   3    0.89    0.18
   5  -8   3    0.76    0.13
   5  -8   3    0.82    0.22
   5   8   3    0.82    0.13
  -5   8  -3    0.58    0.26
   5   8   3    0.56    0.20
   5  -9  -3    2.41    0.19
  -5   9   3    2.43    0.31
   5   9  -3    2.62    0.21
   4  -9  -3    1.62    0.16
   4   9  -3    2.15    0.17
  -4   9   3    1.92    0.26
   4   9  -3    1.98    0.16
   3  -9  -3    0.06    0.07
   3  -9  -3    0.05    0.07
   3   9  -3    0.21    0.07
   3   9  -3    0.20    0.07
   3   9  -3    0.05    0.07
  -3   9   3    0.23    0.14
  -3   9   3    0.13    0.09
  -2  -9   3   34.73    0.68
   2  -9  -3   34.59    0.74
  -2   9   3   34.00    0.83
   2   9  -3   34.63    0.73
   2   9  -3   34.59    0.64
   2   9  -3   34.61    0.76
  -2   9   3   33.91    0.66
   1  -9  -3   17.30    0.44
  -1  -9   3   17.71    0.43
   1   9  -3   17.36    0.33
  -1   9   3   17.22    0.45
   1   9  -3   18.51    0.46
   0  -9   3    5.89    0.22
   0  -9  -3    6.52    0.24
   0   9   3    6.23    0.25
   0   9  -3    6.76    0.25
   1  -9   3   27.41    0.45
   1  -9   3   27.20    0.61
  -1  -9  -3   26.58    0.59
   1   9   3   27.14    0.63
  -1   9  -3   26.36    0.60
  -1   9  -3   26.94    0.61
   2  -9   3   11.36    0.35
   2  -9   3   10.71    0.33
   2  -9   3   10.74    0.26
   2   9   3   10.40    0.33
   2   9   3   10.61    0.31
  -2   9  -3   10.51    0.27
  -2   9  -3   10.45    0.37
   3  -9   3    0.55    0.10
   3  -9   3    0.72    0.11
   3   9   3    0.78    0.16
   3   9   3    0.63    0.11
  -3   9  -3    0.60    0.17
   3   9   3    0.57    0.09
   4  -9   3    0.96    0.13
  -4   9  -3    0.90    0.23
   4   9   3    1.14    0.13
   4   9   3    1.01    0.20
   5  -9   3    0.09    0.10
  -5   9  -3    0.08    0.24
   5   9   3   -0.02    0.17
   5   9   3    0.00    0.10
   5 -10  -3    5.25    0.25
  -5  10   3    4.83    0.41
   5  10  -3    5.18    0.26
   4 -10  -3    0.40    0.11
   4  10  -3    0.86    0.12
   4  10  -3    0.60    0.11
  -4  10   3    0.42    0.18
   3 -10  -3    0.98    0.12
   3 -10  -3    1.02    0.12
   3  10  -3    0.94    0.12
  -3  10   3    0.70    0.18
   3  10  -3    1.06    0.11
  -3  10   3    1.05    0.12
  -2 -10   3    0.38    0.06
   2 -10  -3    0.46    0.08
   2  10  -3    0.47    0.10
  -2  10   3    0.34    0.07
   2  10  -3    0.50    0.08
  -2  10   3    0.54    0.09
  -2  10   3    0.51    0.14
  -1 -10   3   37.83    0.79
   1 -10  -3   37.21    0.81
   1  10  -3   37.91    0.64
  -1  10   3   38.21    0.83
   1  10  -3   39.64    0.85
   0 -10  -3   39.99    0.84
   0 -10   3   40.15    0.84
   0  10   3   39.61    0.87
   0  10  -3   40.06    0.87
   1 -10   3    0.20    0.03
  -1 -10  -3    0.22    0.07
   1 -10   3    0.11    0.08
  -1  10  -3    0.19    0.10
  -1  10  -3    0.03    0.08
   1  10   3    0.28    0.08
   2 -10   3    0.23    0.09
   2 -10   3    0.36    0.07
  -2  10  -3    0.11    0.13
   2  10   3    0.25    0.07
  -2  10  -3    0.52    0.08
   2  10   3    0.26    0.09
   3 -10   3    3.20    0.18
   3 -10   3    3.20    0.19
   3  10   3    2.99    0.20
  -3  10  -3    3.29    0.31
   4 -10   3    1.88    0.18
   4  10   3    2.02    0.24
  -4  10  -3    1.73    0.25
   4  10   3    2.04    0.18
   5 -10   3    2.34    0.21
  -5  10  -3    2.27    0.34
   5  10   3    2.31    0.29
   5  10   3    2.69    0.22
   5 -11  -3   -0.06    0.10
   5  11  -3    0.14    0.11
  -5  11   3   -0.07    0.19
   4 -11  -3    0.01    0.09
   4  11  -3   -0.11    0.08
   4  11  -3   -0.08    0.09
  -4  11   3   -0.01    0.15
   3 -11  -3    1.47    0.15
  -3  11   3    1.46    0.23
  -3  11   3    1.32    0.14
   3  11  -3    1.61    0.17
   2 -11  -3    1.82    0.15
  -2  11   3    1.87    0.14
   2  11  -3    1.87    0.16
  -2  11   3    1.84    0.14
   2  11  -3    1.89    0.12
  -1 -11   3    1.83    0.14
  -1 -11   3    2.29    0.15
   1 -11  -3    1.89    0.15
   1  11  -3    2.15    0.09
  -1  11   3    1.97    0.17
   1  11  -3    2.01    0.15
   0 -11  -3    4.95    0.21
   0 -11   3    4.50    0.21
   0  11  -3    4.80    0.24
   0  11   3    5.07    0.23
   1 -11   3   75.87    1.49
  -1 -11  -3   76.17    1.47
   1  11   3   76.01    1.52
  -1  11  -3   74.45    1.48
  -1  11  -3   75.25    1.50
  -2 -11  -3   32.21    0.62
   2 -11   3   30.31    0.71
   2 -11   3   31.15    0.56
  -2  11  -3   30.56    0.76
   2  11   3   31.18    0.73
   3 -11   3    2.90    0.17
   3 -11   3    3.11    0.20
  -3  11  -3    3.87    0.32
   3  11   3    3.12    0.22
   4 -11   3    1.65    0.16
   4  11   3    1.76    0.18
  -4  11  -3    1.87    0.28
   5 -11   3    2.62    0.22
  -5  11  -3    2.43    0.35
   5  11   3    3.33    0.24
   5 -12  -3    0.44    0.12
   5  12  -3    0.44    0.13
  -5  12   3    0.28    0.20
   4 -12  -3    2.24    0.18
  -4  12   3    2.07    0.27
   4  12  -3    2.20    0.20
   3 -12  -3    8.12    0.30
   3  12  -3    8.90    0.33
  -3  12   3    8.49    0.44
  -3  12   3    8.25    0.30
   2 -12  -3    6.46    0.25
   2  12  -3    6.07    0.27
  -2  12   3    6.09    0.23
  -2  12   3    5.96    0.22
   1 -12  -3    0.16    0.07
  -1 -12   3    0.21    0.07
  -1 -12   3    0.08    0.07
   1  12  -3    0.19    0.09
  -1  12   3    0.11    0.08
   0 -12  -3    0.00    0.06
   0 -12   3   -0.08    0.06
   0  12  -3   -0.12    0.07
   0  12   3   -0.07    0.07
   1 -12   3   31.98    0.72
  -1 -12  -3   32.06    0.70
  -1  12  -3   31.98    0.74
   1  12   3   31.16    0.74
   2 -12   3    5.25    0.17
   2 -12   3    5.07    0.24
  -2 -12  -3    5.32    0.18
  -2  12  -3    5.39    0.33
   2  12   3    5.15    0.25
   3 -12   3   16.09    0.39
   3 -12   3   15.36    0.44
  -3  12  -3   16.51    0.56
   3  12   3   15.67    0.47
   4 -12   3    0.08    0.10
  -4  12  -3    0.08    0.19
   4  12   3    0.06    0.10
   5 -12   3    0.13    0.13
  -5  12  -3    0.26    0.26
   5  12   3    0.56    0.14
   5 -13  -3    0.60    0.13
  -5  13   3    0.48    0.23
   5  13  -3    0.40    0.13
   4 -13  -3    3.00    0.21
   4  13  -3    3.00    0.23
  -4  13   3    3.18    0.32
   3 -13  -3    0.48    0.11
   3  13  -3    0.20    0.12
  -3  13   3    0.42    0.10
  -3  13   3    0.40    0.20
   2 -13  -3   42.02    0.93
  -2  13   3   42.05    0.80
   2  13  -3   42.17    0.95
  -2  13   3   43.17    0.90
   1 -13  -3    0.20    0.08
  -1 -13   3    0.09    0.08
  -1 -13   3    0.16    0.07
   1  13  -3    0.21    0.08
  -1  13   3    0.15    0.08
   0 -13   3   -0.01    0.07
   0 -13  -3    0.07    0.07
   0  13   3   -0.01    0.07
   0  13  -3   -0.01    0.08
  -1 -13  -3   59.15    1.20
   1 -13   3   59.40    1.22
   1  13   3   60.05    1.26
  -1  13  -3   58.91    1.24
  -2 -13  -3   13.92    0.34
   2 -13   3   13.62    0.30
   2 -13   3   13.42    0.41
  -2  13  -3   13.48    0.47
   2  13   3   13.35    0.43
   3 -13   3    3.10    0.19
   3 -13   3    3.10    0.21
   3  13   3    3.23    0.22
  -3  13  -3    3.25    0.31
   4 -13   3    1.07    0.15
  -4  13  -3    1.18    0.24
   4  13   3    1.26    0.16
   5 -13   3    2.28    0.23
  -5  13  -3    2.09    0.33
   5  13   3    2.70    0.25
   5 -14  -3    0.61    0.14
  -5  14   3    0.42    0.21
   5  14  -3    0.41    0.13
   4 -14  -3    2.62    0.21
   4  14  -3    2.24    0.22
  -4  14   3    2.70    0.32
   3 -14  -3    0.35    0.11
  -3  14   3    0.54    0.12
   3  14  -3   -0.01    0.12
  -3  14   3    0.35    0.19
   2 -14  -3    0.63    0.12
  -2 -14   3    0.62    0.09
  -2  14   3    0.86    0.12
  -2  14   3    0.75    0.12
   2  14  -3    0.80    0.14
   1 -14  -3    0.82    0.11
  -1 -14   3    0.71    0.11
  -1  14   3    0.91    0.13
   1  14  -3    0.69    0.13
   0 -14  -3    1.46    0.14
   0 -14   3    1.61    0.16
   0  14  -3    1.41    0.15
   0  14   3    1.50    0.16
  -1 -14  -3   94.03    1.81
   1 -14   3   94.56    1.85
  -1  14  -3   94.41    1.86
   1  14   3   92.18    1.88
   2 -14   3    5.78    0.18
   2 -14   3    6.44    0.28
  -2 -14  -3    5.92    0.22
  -2  14  -3    6.00    0.24
  -2  14  -3    5.95    0.34
   2  14   3    5.84    0.29
   3 -14   3    0.89    0.14
   3 -14   3    0.84    0.12
  -3  14  -3    1.15    0.22
   3  14   3    0.75    0.14
   4 -14   3   -0.16    0.10
  -4  14  -3   -0.12    0.18
   4  14   3    0.04    0.11
   5 -14   3    4.95    0.30
  -5  14  -3    5.79    0.48
   5  14   3    5.60    0.33
   5 -15  -3    0.16    0.12
   5  15  -3    0.21    0.13
  -5  15   3    0.28    0.21
   4 -15  -3    2.40    0.20
  -4  15   3    1.90    0.28
   4  15  -3    2.17    0.22
   3 -15  -3    5.95    0.28
   3  15  -3    5.27    0.30
  -3  15   3    5.96    0.27
  -3  15   3    6.46    0.41
   2 -15  -3   27.74    0.70
  -2 -15   3   29.27    0.63
   2  15  -3   27.92    0.73
  -2  15   3   28.96    0.68
  -2  15   3   27.43    0.59
   1 -15  -3    3.08    0.21
  -1 -15   3    2.86    0.19
   1  15  -3    3.06    0.23
  -1  15   3    2.94    0.22
   0 -15   3    8.95    0.32
   0 -15  -3    8.73    0.32
   0  15  -3    9.16    0.36
   0  15   3    8.98    0.35
  -1 -15  -3    1.05    0.13
   1 -15   3    0.84    0.13
   1  15   3    0.88    0.13
   2 -15   3    8.22    0.32
  -2  15  -3    8.45    0.30
   2  15   3    8.02    0.34
  -2  15  -3    7.69    0.38
   3 -15   3    2.41    0.21
  -3  15  -3    2.39    0.26
   3  15   3    2.04    0.20
   4 -15   3   -0.05    0.11
  -4  15  -3    0.10    0.21
   4  15   3    0.17    0.13
   5 -16  -3   -0.06    0.11
  -5  16   3   -0.06    0.18
   5  16  -3    0.00    0.12
   4 -16  -3    5.14    0.28
  -4  16   3    5.28    0.27
   4  16  -3    4.70    0.30
  -4  16   3    5.32    0.39
   3 -16  -3   12.27    0.42
   3  16  -3   12.13    0.45
  -3  16   3   13.09    0.55
  -3  16   3   12.43    0.38
   2 -16  -3   69.67    1.46
  -2 -16   3   70.21    1.38
  -2  16   3   70.47    1.43
   2  16  -3   69.36    1.49
  -2  16   3   69.30    1.24
   1 -16  -3    0.07    0.09
  -1 -16   3   -0.05    0.09
   1  16  -3    0.05    0.10
  -1  16   3    0.04    0.10
   0 -16  -3    1.20    0.14
   0 -16   3    1.22    0.14
   0 -16   3    1.36    0.15
   0  16   3    1.20    0.16
   0  16  -3    1.18    0.16
  -1 -16  -3    4.00    0.22
   1 -16   3    3.89    0.23
   1  16   3    4.03    0.26
  -1  16  -3    3.89    0.25
   2 -16   3    9.32    0.35
  -2  16  -3    9.11    0.42
   2  16   3    8.81    0.37
  -2  16  -3    8.88    0.32
   3 -16   3    1.65    0.18
   3  16   3    1.55    0.19
  -3  16  -3    1.46    0.24
   4 -16   3   -0.18    0.11
  -4  16  -3   -0.03    0.22
   4  16   3    0.05    0.12
   5 -17  -3    0.16    0.13
  -5  17   3    0.32    0.22
   5  17  -3   -0.03    0.13
   4 -17  -3    0.16    0.11
  -4  17   3    0.18    0.19
   4  17  -3    0.02    0.11
  -4  17   3    0.18    0.11
   3 -17  -3    0.61    0.13
  -3  17   3    0.35    0.12
   3  17  -3    0.35    0.14
  -3  17   3    0.68    0.22
  -2 -17   3   28.02    0.63
   2 -17  -3   26.11    0.69
  -2  17   3   25.57    0.58
  -2  17   3   27.20    0.68
   2  17  -3   25.70    0.73
   1 -17  -3   24.73    0.65
  -1 -17   3   24.67    0.62
   1  17  -3   24.16    0.69
  -1  17   3   25.82    0.67
   0 -17  -3    0.10    0.10
   0 -17   3    0.00    0.09
   0 -17   3    0.05    0.11
   0  17   3    0.05    0.11
   0  17  -3    0.14    0.11
  -1 -17  -3    0.07    0.09
   1 -17   3    0.04    0.09
   1  17   3   -0.05    0.09
  -1  17  -3    0.02    0.10
   2 -17   3    7.96    0.33
   2  17   3    7.74    0.35
  -2  17  -3    6.75    0.39
   3 -17   3    0.73    0.15
  -3  17  -3    0.77    0.22
   3  17   3    0.81    0.16
   4 -17   3    0.69    0.16
   4  17   3    1.20    0.19
  -4  17  -3    0.82    0.25
   4 -18  -3    3.72    0.27
   4  18  -3    3.82    0.29
  -4  18   3    3.82    0.25
  -4  18   3    3.63    0.36
   3 -18  -3    0.31    0.12
   3  18  -3    0.26    0.14
  -3  18   3    0.32    0.20
  -3  18   3    0.35    0.12
  -2  18   3    0.26    0.11
   2  18  -3    0.28    0.16
  -2  18   3    0.17    0.13
   1 -18  -3   91.81    1.85
  -1 -18   3   90.90    1.81
  -1  18   3   89.40    1.86
   1  18  -3   91.31    1.90
   0 -18   3   36.53    0.85
   0 -18  -3   36.47    0.86
   0 -18   3   37.03    0.86
   0  18   3   36.68    0.91
   0  18  -3   36.14    0.90
   1 -18   3    0.31    0.11
  -1 -18  -3    0.47    0.11
  -1  18  -3    0.32    0.13
   1  18   3    0.30    0.13
   2 -18   3    0.08    0.11
   2  18   3    0.12    0.11
  -2  18  -3   -0.02    0.17
   3 -18   3   -0.08    0.12
   3  18   3    0.34    0.14
  -3  18  -3    0.21    0.20
   4 -18   3    0.15    0.14
  -4  18  -3    0.04    0.23
   4  18   3    0.36    0.15
   4 -19  -3    4.28    0.29
  -4  19   3    4.58    0.41
   4  19  -3    4.15    0.31
  -4  19   3    4.04    0.25
   3 -19  -3    0.52    0.14
  -3  19   3    0.44    0.12
   3  19  -3    0.50    0.15
  -3  19   3    0.58    0.23
   2 -19  -3   39.43    0.97
  -2  19   3   40.92    0.82
  -2  19   3   42.50    0.96
   2  19  -3   41.29    1.02
  -1 -19   3    2.44    0.24
   1  19  -3    1.80    0.23
  -1  19   3    1.81    0.22
   0 -19   3   19.84    0.56
   0 -19   3   19.97    0.56
   0 -19  -3   19.25    0.56
   0  19   3   19.72    0.62
   0  19  -3   20.17    0.61
   1 -19   3   -0.09    0.11
  -1 -19  -3   -0.10    0.10
  -1  19  -3    0.08    0.12
   1  19   3   -0.12    0.11
   2 -19   3    3.07    0.24
  -2  19  -3    3.08    0.32
   2  19   3    3.16    0.26
   3 -19   3   -0.07    0.13
   3  19   3    0.10    0.13
  -3  19  -3    0.20    0.20
   4 -19   3    4.52    0.31
  -4  19  -3    5.16    0.45
   4  19   3    4.61    0.33
   4 -20  -3    0.10    0.13
  -4  20   3    0.58    0.23
  -4  20   3    0.40    0.13
   4  20  -3    0.02    0.14
   3 -20  -3    0.11    0.12
  -3  20   3    0.19    0.11
   3  20  -3    0.22    0.14
  -3  20   3    0.07    0.19
   2 -20  -3    0.18    0.13
  -2  20   3    0.22    0.11
   2  20  -3    0.06    0.15
   1 -20  -3   12.65    0.47
  -1 -20   3   13.25    0.45
   1  20  -3   13.62    0.52
  -1  20   3   13.03    0.50
   0 -20   3    3.36    0.25
   0 -20  -3    3.44    0.29
   0  20   3    2.95    0.32
   0  20  -3    4.09    0.32
  -1 -20  -3    0.67    0.14
   1 -20   3    0.37    0.13
   1 -20   3    0.57    0.14
   1  20   3    0.37    0.14
  -1  20  -3    0.53    0.15
   2 -20   3    0.62    0.14
   2  20   3    0.58    0.16
  -2  20  -3    0.62    0.21
   3 -20   3    2.99    0.25
  -3  20  -3    3.02    0.33
   3  20   3    3.31    0.29
   4 -20   3   11.00    0.45
   4  20   3   10.71    0.47
  -4  20  -3   11.33    0.59
   4 -21  -3    0.09    0.14
  -4  21   3    0.08    0.11
   4  21  -3    0.24    0.16
  -4  21   3   -0.11    0.21
   3 -21  -3    0.88    0.17
  -3  21   3    1.07    0.15
  -3  21   3    0.67    0.24
   3  21  -3    0.82    0.19
   2 -21  -3    0.03    0.12
   2  21  -3   -0.18    0.13
  -2  21   3   -0.05    0.09
   1 -21  -3   44.79    1.07
  -1 -21   3   45.06    1.02
  -1  21   3   45.53    1.09
   1  21  -3   44.53    1.11
   0 -21  -3    8.29    0.40
   0 -21   3    9.26    0.39
   0  21   3    8.83    0.45
   0  21  -3    8.78    0.43
  -1 -21  -3    6.64    0.32
   1 -21   3    6.94    0.34
   1 -21   3    6.30    0.34
  -1  21  -3    7.04    0.36
   1  21   3    7.10    0.38
   2 -21   3    0.17    0.14
   2 -21   3    0.05    0.13
   2  21   3    0.27    0.14
  -2  21  -3    0.26    0.20
   3 -21   3    0.88    0.19
   3  21   3    0.87    0.19
  -3  21  -3    1.29    0.27
   4 -21   3    0.47    0.18
  -4  21  -3    0.86    0.28
   4  21   3    0.68    0.19
   4 -22  -3   -0.01    0.14
  -4  22   3    0.16    0.23
  -4  22   3    0.04    0.11
   4  22  -3   -0.15    0.14
   3 -22  -3   -0.04    0.12
  -3  22   3   -0.20    0.19
  -3  22   3   -0.04    0.10
   3  22  -3    0.14    0.14
   2 -22  -3    1.57    0.20
   2  22  -3    1.70    0.23
  -2  22   3    1.75    0.16
  -1 -22   3   26.01    0.68
   1 -22  -3   24.25    0.71
   1  22  -3   24.83    0.75
  -1  22   3   25.47    0.74
   0 -22  -3    0.41    0.17
   0 -22   3    0.86    0.17
   0  22  -3    0.96    0.20
   0  22   3    0.64    0.20
  -1 -22  -3    7.41    0.34
   1 -22   3    7.36    0.36
   1 -22   3    6.97    0.36
  -1  22  -3    7.37    0.38
   1  22   3    6.93    0.38
   2 -22   3    0.51    0.15
   2 -22   3    0.35    0.15
  -2  22  -3    0.35    0.22
   2  22   3    0.65    0.17
   3 -22   3   -0.21    0.13
   3 -22   3    0.04    0.14
  -3  22  -3    0.19    0.23
   3  22   3    0.25    0.16
   4 -23  -3    0.33    0.16
  -4  23   3    0.30    0.24
  -4  23   3    0.64    0.15
   4  23  -3    0.36    0.17
   3 -23  -3    0.00    0.13
  -3  23   3   -0.01    0.10
  -3  23   3   -0.22    0.21
   3  23  -3   -0.16    0.13
   2 -23  -3    0.12    0.13
  -2  23   3    0.25    0.11
   2  23  -3    0.14    0.15
   1 -23  -3    9.93    0.42
  -1 -23   3   10.46    0.41
  -1  23   3   10.67    0.47
   1  23  -3   10.67    0.49
   0 -23  -3   18.85    0.60
   0 -23   3   18.70    0.58
   0  23  -3   18.62    0.63
   0  23   3   19.18    0.64
   1 -23   3    0.13    0.14
  -1 -23  -3    0.16    0.13
   1  23   3    0.12    0.16
  -1  23  -3    0.26    0.15
   2 -23   3    4.07    0.28
   2 -23   3    4.04    0.28
   2  23   3    4.35    0.33
  -2  23  -3    4.47    0.40
   3 -23   3    0.77    0.18
   3 -23   3    0.84    0.18
  -3  23  -3    0.97    0.27
   3  23   3    0.76    0.19
   3 -24  -3    0.51    0.16
  -3  24   3    0.44    0.24
   3  24  -3    0.46    0.18
  -3  24   3    0.45    0.13
   2 -24  -3    0.19    0.14
   2  24  -3   -0.03    0.15
  -2  24   3    0.06    0.10
   1 -24  -3    1.03    0.18
  -1 -24   3    1.22    0.18
  -1  24   3    1.07    0.20
   1  24  -3    0.82    0.21
   0 -24   3    1.40    0.20
   0 -24  -3    1.09    0.19
   0  24  -3    1.08    0.22
   0  24   3    1.25    0.23
   1 -24   3    0.23    0.15
   1  24   3    0.30    0.17
  -1  24  -3    0.43    0.18
   2 -24   3    0.99    0.18
   2 -24   3    1.15    0.20
   2  24   3    1.40    0.23
  -2  24  -3    1.53    0.29
   3 -24   3    2.96    0.28
   3 -24   3    2.97    0.28
  -3  24  -3    3.23    0.36
   3  24   3    3.19    0.31
   3 -25  -3   -0.11    0.13
   3  25  -3    0.02    0.16
  -3  25   3    0.19    0.12
  -3  25   3   -0.05    0.21
   2 -25  -3    1.05    0.19
   2  25  -3    1.11    0.22
  -2  25   3    1.29    0.15
  -1 -25   3    1.77    0.20
   1 -25  -3    1.52    0.21
   1  25  -3    1.53    0.23
  -1  25   3    1.71    0.23
   0 -25   3    0.06    0.14
   0 -25  -3   -0.18    0.13
   0  25  -3    0.02    0.16
   0  25   3    0.04    0.15
   1 -25   3    5.15    0.32
  -1  25  -3    6.45    0.41
   1  25   3    5.60    0.40
   2 -25   3    3.21    0.28
  -2  25  -3    3.19    0.37
   2  25   3    3.25    0.32
   3 -25   3    0.40    0.18
   3 -25   3    0.16    0.15
  -3  25  -3    0.49    0.26
   3  25   3    0.43    0.18
   3 -26  -3    3.13    0.30
   3  26  -3    3.42    0.34
  -3  26   3    3.11    0.39
  -3  26   3    3.08    0.23
   2 -26  -3    0.09    0.14
   2  26  -3    0.22    0.17
  -2  26   3    0.08    0.10
   1 -26  -3    0.11    0.15
  -1  26   3    0.06    0.16
   1  26  -3    0.18    0.18
   0 -26   3    3.09    0.26
   0 -26  -3    2.71    0.28
   0  26  -3    3.17    0.33
   0  26   3    2.73    0.30
   1 -26   3    9.91    0.45
   1  26   3   10.19    0.51
   2 -26   3    0.30    0.16
   2  26   3    0.53    0.19
  -2  26  -3    0.10    0.25
   3 -26   3    1.09    0.21
  -3  26  -3    1.64    0.32
   3  26   3    0.94    0.23
   3 -27  -3    1.97    0.25
  -3  27   3    1.98    0.36
  -3  27   3    1.99    0.20
   3  27  -3    2.27    0.30
   2 -27  -3   -0.07    0.15
  -2  27   3    0.04    0.11
   2  27  -3    0.05    0.18
   1 -27  -3    4.89    0.35
  -1  27   3    5.48    0.39
   1  27  -3    5.10    0.38
   0 -27  -3    0.25    0.15
   0 -27   3    0.15    0.15
   0  27   3    0.18    0.19
   0  27  -3    0.14    0.18
   1 -27   3    2.89    0.28
   1  27   3    3.70    0.36
   2 -27   3    0.56    0.18
   2  27   3    0.55    0.21
  -2  27  -3    0.51    0.27
   2 -28  -3    0.12    0.17
   2  28  -3    0.15    0.18
  -2  28   3    0.30    0.12
   1 -28  -3    0.93    0.20
   1  28  -3    0.76    0.23
   0 -28  -3    6.27    0.38
   0 -28   3    6.42    0.38
   0  28   3    6.66    0.45
   0  28  -3    6.78    0.44
   1 -28   3    0.51    0.18
   1  28   3    0.39    0.20
   2 -28   3    0.30    0.17
   2  28   3    0.63    0.22
  -2  28  -3    0.21    0.26
   2 -29  -3    0.01    0.17
  -2  29   3   -0.03    0.11
   2  29  -3    0.00    0.18
   1 -29  -3    0.95    0.21
  -1  29   3    0.71    0.15
   1  29  -3    1.24    0.26
   0 -29  -3    1.43    0.23
   0 -29   3    1.47    0.23
   0  29  -3    1.84    0.28
   0  29   3    1.61    0.28
   1 -29   3    0.14    0.17
   1  29   3    0.59    0.22
   2 -29   3    0.09    0.17
  -2  29  -3   -0.41    0.25
   2  29   3   -0.05    0.18
   1 -30  -3    0.44    0.20
  -1  30   3    0.07    0.13
   1  30  -3    0.56    0.23
   0 -30   3    0.21    0.18
   0  30  -3   -0.01    0.20
   0  30   3   -0.21    0.19
   1 -30   3    0.14    0.17
   1  30   3    0.18    0.21
   0 -31   3    0.65    0.20
   0  31   3    0.73    0.25
   0  31  -3    0.83    0.26
   5   0  -4    0.55    0.11
  -5   0   4    0.27    0.21
   4   0  -4    2.92    0.20
  -4   0   4    3.16    0.33
   3   0  -4    1.85    0.14
   3   0  -4    1.67    0.13
  -3   0   4    1.54    0.18
   2   0  -4    1.45    0.11
   2   0  -4    1.24    0.11
  -2   0   4    1.16    0.08
   2   0  -4    1.08    0.10
  -2   0   4    1.11    0.12
  -2   0   4    1.24    0.10
  -1   0   4   12.36    0.27
   1   0  -4   12.41    0.34
  -1   0   4   12.10    0.33
  -1   0   4   12.58    0.31
   0   0  -4    1.17    0.10
   0   0  -4    1.17    0.11
   0   0   4    1.14    0.11
   1   0   4    6.35    0.25
  -1   0  -4    6.52    0.23
   1   0   4    6.31    0.21
   1   0   4    6.33    0.23
   2   0   4  178.87    3.28
   2   0   4  177.36    3.57
   2   0   4  177.26    3.38
   3   0   4   22.21    0.65
   3   0   4   21.48    0.52
   3   0   4   19.78    0.51
   4   0   4    0.29    0.10
   4   0   4    0.09    0.16
   5   0   4    4.10    0.23
   5   0   4    4.41    0.33
   5  -1  -4    0.05    0.08
  -5  -1   4   -0.24    0.18
   5   1  -4    0.04    0.09
  -5   1   4    0.02    0.18
  -4  -1   4   19.05    0.64
   4  -1  -4   18.73    0.48
   4   1  -4   18.57    0.48
  -4   1   4   18.07    0.62
   3  -1  -4    0.53    0.08
  -3  -1   4    0.41    0.13
   3  -1  -4    0.56    0.09
   3   1  -4    0.49    0.08
  -3   1   4    0.70    0.14
   3   1  -4    0.46    0.08
  -2  -1   4    2.95    0.12
  -2  -1   4    3.11    0.18
  -2  -1   4    3.13    0.15
   2  -1  -4    3.31    0.16
   2  -1  -4    3.30    0.15
   2  -1  -4    3.46    0.15
  -2   1   4    3.07    0.14
   2   1  -4    3.02    0.15
  -2   1   4    2.98    0.18
  -2   1   4    2.90    0.12
   2   1  -4    3.18    0.15
   2   1  -4    3.00    0.15
   1  -1  -4    0.72    0.10
  -1  -1   4    0.51    0.09
  -1  -1   4    0.91    0.08
  -1  -1   4    0.86    0.08
   1   1  -4    0.58    0.10
  -1   1   4    0.75    0.09
  -1   1   4    0.74    0.10
  -1   1   4    1.10    0.09
   0  -1   4   76.21    1.47
   0  -1  -4   74.22    1.54
   0  -1  -4   75.08    1.47
   0   1  -4   77.91    1.47
   0   1  -4   76.39    1.53
   0   1   4   75.39    1.47
  -1  -1  -4    5.15    0.20
   1  -1   4    5.23    0.23
   1  -1   4    4.94    0.21
   1  -1   4    5.02    0.19
   1   1   4    5.01    0.21
  -1   1  -4    4.99    0.20
   1   1   4    5.48    0.24
   2  -1   4  269.95    5.48
   2  -1   4  282.12    5.08
   2  -1   4  279.76    5.24
   2   1   4  275.00    5.68
   2   1   4  284.57    5.29
   2   1   4  284.09    5.08
   3  -1   4   14.77    0.51
   3  -1   4   13.74    0.39
   3  -1   4   13.53    0.40
   3   1   4   13.19    0.38
  -3   1  -4   14.15    0.51
   3   1   4   13.64    0.50
   3   1   4   13.96    0.40
   4  -1   4    3.57    0.29
   4  -1   4    3.65    0.20
   4   1   4    3.33    0.27
   4   1   4    3.60    0.21
   5  -1   4    0.62    0.12
   5  -1   4    0.77    0.23
   5   1   4    0.92    0.23
   5   1   4    0.55    0.13
   5  -2  -4    0.13    0.09
  -5  -2   4    0.01    0.18
  -5   2   4   -0.06    0.17
   5   2  -4    0.06    0.09
   4  -2  -4   44.39    0.91
  -4  -2   4   42.35    1.06
   4   2  -4   42.77    0.90
  -4   2   4   40.39    1.06
   3  -2  -4    2.52    0.15
  -3  -2   4    2.35    0.22
   3  -2  -4    2.56    0.16
   3   2  -4    2.55    0.15
  -3   2   4    2.23    0.22
  -3   2   4    2.34    0.16
   3   2  -4    2.51    0.15
  -2  -2   4    0.71    0.09
  -2  -2   4    0.79    0.11
   2  -2  -4    0.77    0.09
   2  -2  -4    0.73    0.08
  -2  -2   4    0.74    0.06
  -2   2   4    0.57    0.06
   2   2  -4    0.59    0.08
   2   2  -4    0.61    0.08
  -2   2   4    0.56    0.08
  -2   2   4    0.65    0.11
   2   2  -4    0.70    0.09
  -1  -2   4  176.02    3.20
  -1  -2   4  174.04    2.79
   1  -2  -4  174.46    3.29
  -1  -2   4  176.84    3.23
  -1   2   4  177.12    3.35
  -1   2   4  177.94    3.27
  -1   2   4  175.08    3.00
   1   2  -4  179.12    3.41
   0  -2   4    8.82    0.27
   0  -2  -4    9.19    0.28
   0  -2  -4    9.22    0.27
   0   2   4    9.05    0.28
   0   2  -4    8.98    0.28
   0   2  -4    8.99    0.26
   1  -2   4   40.40    0.90
   1  -2   4   40.05    0.84
   1  -2   4   39.54    0.80
  -1  -2  -4   40.49    0.82
   1   2   4   41.17    0.85
   1   2   4   39.38    0.91
  -1   2  -4   40.28    0.83
   2  -2   4  139.86    2.87
   2  -2   4  142.97    2.64
   2  -2   4  142.50    2.63
   2   2   4  139.08    2.86
   2   2   4  141.52    2.64
   2   2   4  141.29    2.63
  -2   2  -4  138.89    2.65
   3  -2   4   36.23    0.96
   3  -2   4   38.59    0.82
   3  -2   4   38.08    0.82
   3   2   4   37.53    0.82
   3   2   4   38.01    0.97
  -3   2  -4   39.90    0.94
   3   2   4   38.91    0.82
   4  -2   4    0.87    0.20
   4  -2   4    0.93    0.12
   4   2   4    0.67    0.12
   4   2   4    0.90    0.19
  -4   2  -4    0.88    0.24
   5  -2   4    0.02    0.10
   5  -2   4    0.01    0.18
   5   2   4    0.05    0.18
   5   2   4   -0.27    0.09
  -5  -3   4    0.16    0.20
   5  -3  -4    0.53    0.11
   5   3  -4    0.32    0.10
  -5   3   4    0.43    0.20
  -4  -3   4    0.35    0.19
   4  -3  -4    0.03    0.11
  -4   3   4    0.45    0.21
   4   3  -4    0.02    0.11
   3  -3  -4    0.70    0.09
   3  -3  -4    0.86    0.10
  -3  -3   4    0.80    0.15
   3   3  -4    0.78    0.09
   3   3  -4    0.75    0.10
  -3   3   4    0.60    0.15
  -3   3   4    0.70    0.12
   2  -3  -4   11.16    0.31
  -2  -3   4   10.49    0.27
  -2  -3   4   10.96    0.33
  -2  -3   4   10.34    0.25
   2  -3  -4   11.20    0.32
  -2   3   4   10.54    0.28
   2   3  -4   10.62    0.30
  -2   3   4   10.41    0.35
   2   3  -4   10.70    0.31
   2   3  -4   10.70    0.27
  -1  -3   4    3.69    0.15
  -1  -3   4    3.98    0.14
  -1  -3   4    3.48    0.19
   1  -3  -4    3.84    0.18
   1   3  -4    3.73    0.17
   1   3  -4    3.57    0.19
  -1   3   4    4.14    0.16
  -1   3   4    3.67    0.18
   0  -3   4    8.01    0.24
   0  -3  -4    8.33    0.26
   0  -3   4    7.86    0.27
   0   3  -4    8.15    0.27
   0   3   4    7.46    0.26
   0   3  -4    8.33    0.24
   1  -3   4   64.47    1.21
   1  -3   4   63.56    1.35
  -1  -3  -4   65.05    1.25
   1  -3   4   63.23    1.26
  -1   3  -4   64.37    1.25
   1   3   4   63.29    1.27
  -1   3  -4   62.77    1.21
   2  -3   4  175.56    3.23
   2  -3   4  172.84    3.51
   2  -3   4  176.66    3.23
  -2   3  -4  174.64    3.24
   2   3   4  170.87    3.50
   2   3   4  174.51    3.23
   2   3   4  177.47    3.36
   3  -3   4   11.52    0.35
   3  -3   4   11.41    0.45
   3  -3   4   12.88    0.37
   3   3   4   12.32    0.46
   3   3   4   11.20    0.36
  -3   3  -4   12.82    0.47
   4  -3   4    1.67    0.24
   4  -3   4    1.18    0.13
   4   3   4    1.18    0.21
  -4   3  -4    1.16    0.25
   4   3   4    1.25    0.14
   5  -3   4    0.79    0.22
   5  -3   4    0.54    0.12
  -5   3  -4    0.26    0.27
   5   3   4    0.20    0.11
   5   3   4    0.83    0.22
  -5  -4   4   -0.07    0.20
   5  -4  -4    0.08    0.09
  -5   4   4    0.01    0.17
   5   4  -4    0.06    0.09
  -4  -4   4   26.23    0.78
   4  -4  -4   26.37    0.62
   4   4  -4   26.15    0.63
  -4   4   4   26.84    0.80
   3  -4  -4    0.98    0.11
  -3  -4   4    0.87    0.15
   3  -4  -4    1.00    0.11
   3   4  -4    0.85    0.10
  -3   4   4    0.86    0.16
   3   4  -4    0.97    0.11
  -3   4   4    0.86    0.12
  -2  -4   4    2.58    0.18
  -2  -4   4    2.05    0.10
   2  -4  -4    2.57    0.14
   2  -4  -4    2.56    0.15
  -2   4   4    2.03    0.18
   2   4  -4    2.40    0.12
   2   4  -4    2.39    0.15
  -2   4   4    2.27    0.13
   2   4  -4    2.36    0.14
   1  -4  -4   50.61    1.04
  -1  -4   4   51.52    0.85
  -1  -4   4   50.82    1.02
   1   4  -4   50.66    1.02
   1   4  -4   51.28    1.05
   1   4  -4   51.11    0.97
  -1   4   4   51.37    1.03
   0  -4  -4   54.48    1.08
   0  -4   4   53.09    1.07
   0  -4   4   53.36    1.10
   0   4  -4   53.82    1.10
   0   4  -4   53.13    1.09
   0   4   4   52.37    1.08
   1  -4   4   92.78    1.73
   1  -4   4   91.64    1.91
   1  -4   4   93.39    1.79
  -1  -4  -4   92.46    1.76
  -1   4  -4   93.68    1.73
   1   4   4   94.34    1.80
  -1   4  -4   94.37    1.78
   2  -4   4    0.52    0.11
   2  -4   4    0.30    0.16
   2  -4   4    0.61    0.11
   2   4   4    0.26    0.14
   2   4   4   -0.22    0.12
   3  -4   4    0.81    0.11
   3  -4   4    0.55    0.18
   3  -4   4    0.70    0.11
   3   4   4    1.04    0.18
  -3   4  -4    0.82    0.19
   3   4   4    0.28    0.11
   3   4   4    0.35    0.10
   4  -4   4   -0.15    0.14
   4  -4   4    0.05    0.09
  -4   4  -4   -0.15    0.17
   4   4   4   -0.05    0.08
   4   4   4    0.01    0.16
   5  -4   4    2.30    0.19
   5  -4   4    2.61    0.32
   5   4   4    2.41    0.29
   5   4   4    2.10    0.20
  -5   4  -4    1.95    0.32
   5  -5  -4    4.60    0.23
  -5  -5   4    4.54    0.37
  -5   5   4    4.67    0.38
   5   5  -4    4.36    0.24
  -4  -5   4   64.16    1.47
   4  -5  -4   64.53    1.31
  -4   5   4   65.57    1.51
   4   5  -4   65.93    1.32
   3  -5  -4    0.88    0.11
   3  -5  -4    0.73    0.10
  -3  -5   4    0.73    0.16
   3   5  -4    0.79    0.10
  -3   5   4    0.52    0.16
   3   5  -4    0.74    0.11
  -3   5   4    0.60    0.11
  -2  -5   4    0.07    0.04
  -2  -5   4    0.11    0.09
   2  -5  -4    0.15    0.07
  -2   5   4    0.15    0.10
   2   5  -4    0.08    0.07
   2   5  -4    0.07    0.06
  -2   5   4    0.24    0.07
   2   5  -4    0.06    0.06
   1  -5  -4   76.29    1.49
  -1  -5   4   75.45    1.23
  -1  -5   4   77.39    1.47
   1   5  -4   75.34    1.50
   1   5  -4   76.80    1.41
   1   5  -4   76.01    1.49
  -1   5   4   76.46    1.48
   0  -5   4  147.48    2.74
   0  -5  -4  148.08    2.74
   0  -5   4  144.29    2.92
   0   5  -4  148.90    2.75
   0   5   4  147.01    2.75
   1  -5   4   52.57    1.16
  -1  -5  -4   54.09    1.07
   1  -5   4   52.78    1.03
   1  -5   4   54.25    1.09
   1   5   4   54.71    1.11
  -1   5  -4   54.01    1.08
  -1   5  -4   53.16    1.03
   2  -5   4   40.50    0.97
   2  -5   4   39.96    0.86
   2  -5   4   42.32    0.88
  -2   5  -4   40.71    0.77
   2   5   4   39.88    0.96
   2   5   4   40.53    0.86
  -2   5  -4   39.66    0.88
   2   5   4   39.72    0.88
   3  -5   4    6.35    0.25
   3  -5   4    5.99    0.33
   3   5   4    6.36    0.25
   3   5   4    5.97    0.26
   3   5   4    6.46    0.34
  -3   5  -4    6.93    0.36
   4  -5   4    0.64    0.19
   4  -5   4    0.63    0.11
   4   5   4    0.73    0.12
   4   5   4    0.75    0.18
  -4   5  -4    0.70    0.22
   5  -5   4   -0.12    0.17
   5  -5   4    0.06    0.10
   5   5   4    0.18    0.18
   5   5   4    0.03    0.10
  -5   5  -4   -0.42    0.23
   5  -6  -4    0.05    0.10
   5   6  -4    0.04    0.10
  -5   6   4    0.27    0.19
   4  -6  -4   40.14    0.88
  -4   6   4   40.56    1.06
   4   6  -4   39.80    0.88
   3  -6  -4   13.93    0.39
  -3  -6   4   14.32    0.48
   3  -6  -4   14.47    0.41
   3   6  -4   14.35    0.40
   3   6  -4   14.95    0.39
  -3   6   4   14.02    0.49
  -3   6   4   14.53    0.40
   2  -6  -4   71.51    1.39
   2   6  -4   72.67    1.19
  -2   6   4   70.40    1.45
  -2   6   4   69.37    1.22
   2   6  -4   69.64    1.40
   1  -6  -4  150.93    2.80
  -1  -6   4  146.75    2.36
  -1  -6   4  150.74    2.77
   1   6  -4  149.69    2.71
  -1   6   4  149.43    2.79
   1   6  -4  152.27    2.82
   0  -6  -4    5.74    0.23
   0  -6   4    5.37    0.20
   0  -6   4    5.54    0.22
   0   6  -4    5.47    0.24
   0   6   4    5.33    0.24
  -1  -6  -4   10.28    0.30
   1  -6   4   10.11    0.32
   1  -6   4    9.83    0.31
  -1   6  -4   10.15    0.27
   1   6   4   10.36    0.33
  -1   6  -4   10.16    0.31
   2  -6   4    8.30    0.34
   2  -6   4    8.79    0.30
   2  -6   4    8.70    0.29
   2   6   4    8.52    0.35
  -2   6  -4    8.90    0.33
   2   6   4    8.70    0.29
   2   6   4    7.95    0.30
  -2   6  -4    8.46    0.22
   3  -6   4    0.80    0.20
   3  -6   4    0.90    0.12
   3   6   4    1.34    0.20
  -3   6  -4    1.17    0.20
   3   6   4    0.83    0.13
   4  -6   4    4.95    0.33
   4  -6   4    4.83    0.23
   4   6   4    4.63    0.32
  -4   6  -4    5.15    0.38
   4   6   4    5.07    0.24
   5  -6   4    0.03    0.10
   5  -6   4    0.05    0.17
  -5   6  -4   -0.34    0.22
   5   6   4    0.11    0.10
   5   6   4    0.21    0.19
   5  -7  -4    2.01    0.18
   5   7  -4    1.93    0.19
  -5   7   4    2.05    0.29
   4  -7  -4    0.07    0.10
  -4   7   4    0.54    0.20
   4   7  -4    0.49    0.11
   4   7  -4    0.31    0.11
   3  -7  -4   20.19    0.53
   3  -7  -4   19.87    0.51
  -3   7   4   19.94    0.61
   3   7  -4   20.83    0.50
  -3   7   4   20.21    0.49
   3   7  -4   19.82    0.51
   2  -7  -4    4.69    0.21
   2   7  -4    4.83    0.18
   2   7  -4    4.99    0.22
  -2   7   4    4.34    0.17
  -2   7   4    4.73    0.26
  -2   7   4    5.00    0.20
  -1  -7   4  129.11    2.40
   1  -7  -4  127.94    2.42
  -1   7   4  129.40    2.43
   1   7  -4  128.96    2.44
   1   7  -4  128.16    2.00
   1   7  -4  128.28    2.34
   0  -7   4   75.96    1.54
   0  -7  -4   77.83    1.50
   0  -7   4   76.30    1.19
   0  -7   4   76.30    1.50
   0   7  -4   77.01    1.52
   0   7   4   76.50    1.52
   1  -7   4    0.12    0.07
   1  -7   4    0.13    0.08
  -1  -7  -4    0.14    0.07
  -1   7  -4    0.21    0.07
   1   7   4    0.31    0.08
  -1   7  -4    0.17    0.08
   2  -7   4    4.09    0.20
  -2   7  -4    4.03    0.16
  -2   7  -4    4.37    0.25
   2   7   4    3.90    0.22
   2   7   4    4.07    0.20
   3  -7   4   16.50    0.45
   3  -7   4   15.23    0.55
  -3   7  -4   16.87    0.54
   3   7   4   15.90    0.45
   3   7   4   15.83    0.54
   4  -7   4    0.10    0.16
   4  -7   4   -0.03    0.09
  -4   7  -4   -0.07    0.19
   4   7   4    0.16    0.16
   4   7   4    0.06    0.10
   5  -7   4    0.47    0.21
   5  -7   4    0.13    0.11
   5   7   4    0.33    0.11
   5   7   4    0.09    0.18
  -5   7  -4    0.10    0.23
   5  -8  -4    0.87    0.14
   5   8  -4    0.62    0.13
  -5   8   4    0.72    0.21
   4  -8  -4    3.07    0.22
   4   8  -4    4.01    0.19
   4   8  -4    3.48    0.22
  -4   8   4    3.81    0.34
   3  -8  -4   -0.03    0.08
   3  -8  -4   -0.02    0.08
   3   8  -4    0.09    0.06
  -3   8   4    0.09    0.15
   3   8  -4    0.04    0.08
  -3   8   4    0.12    0.09
   3   8  -4   -0.07    0.06
   2  -8  -4    0.52    0.09
  -2   8   4    0.40    0.07
  -2   8   4    0.48    0.13
  -2   8   4    0.43    0.09
   2   8  -4    0.32    0.09
   2   8  -4    0.43    0.07
   1  -8  -4  153.17    2.83
  -1  -8   4  150.87    2.80
  -1   8   4  149.64    2.82
   1   8  -4  149.64    2.33
   1   8  -4  150.98    2.84
   1   8  -4  150.27    2.74
   0  -8   4    7.70    0.26
   0  -8   4    7.78    0.14
   0  -8  -4    7.72    0.27
   0  -8   4    7.51    0.24
   0   8   4    7.63    0.29
   0   8  -4    7.91    0.29
  -1  -8  -4    1.39    0.14
   1  -8   4    1.18    0.13
   1   8   4    1.39    0.13
  -1   8  -4    1.33    0.13
  -1   8  -4    1.20    0.11
   2  -8   4    0.06    0.08
  -2   8  -4    0.20    0.12
  -2   8  -4    0.07    0.06
   2   8   4    0.18    0.09
   3  -8   4    4.53    0.23
  -3   8  -4    4.57    0.32
   3   8   4    4.70    0.30
   3   8   4    4.10    0.24
   4  -8   4    0.18    0.10
   4  -8   4    0.21    0.16
   4   8   4    0.07    0.16
  -4   8  -4    0.24    0.20
   4   8   4    0.27    0.11
   5  -8   4    3.08    0.33
   5  -8   4    3.11    0.23
  -5   8  -4    2.78    0.36
   5   8   4    3.83    0.25
   5   8   4    3.34    0.32
   5  -9  -4    0.43    0.12
   5   9  -4    0.28    0.11
  -5   9   4    0.42    0.20
   4  -9  -4    1.02    0.14
  -4   9   4    1.04    0.21
   4   9  -4    1.00    0.14
   3  -9  -4    9.91    0.34
   3   9  -4   10.22    0.34
  -3   9   4   10.48    0.33
  -3   9   4   10.55    0.45
   2  -9  -4    9.71    0.31
   2   9  -4    9.43    0.25
  -2   9   4    9.60    0.39
  -2   9   4    9.05    0.27
  -2   9   4    9.36    0.29
   2   9  -4    9.49    0.32
   1  -9  -4   40.22    0.89
  -1  -9   4   41.11    0.86
  -1   9   4   40.91    0.89
   1   9  -4   41.52    0.68
   1   9  -4   42.82    0.92
   0  -9  -4    8.78    0.29
   0  -9   4    8.69    0.26
   0  -9   4    9.01    0.29
   0   9  -4    8.84    0.31
   0   9   4    8.58    0.31
  -1  -9  -4   50.73    1.02
   1  -9   4   48.93    1.03
  -1   9  -4   48.97    1.04
  -1   9  -4   49.24    0.99
   1   9   4   49.35    1.06
   2  -9   4    3.55    0.20
  -2  -9  -4    3.82    0.15
  -2   9  -4    3.36    0.16
  -2   9  -4    3.88    0.24
   2   9   4    3.77    0.21
   3  -9   4    2.14    0.17
   3  -9   4    2.01    0.18
  -3   9  -4    2.03    0.24
   3   9   4    1.71    0.18
   4  -9   4    0.91    0.14
   4   9   4    0.79    0.14
   4   9   4    0.71    0.18
  -4   9  -4    1.05    0.23
   5  -9   4    3.15    0.32
   5  -9   4    2.73    0.22
   5   9   4    3.01    0.29
   5   9   4    3.44    0.24
  -5   9  -4    3.05    0.38
   5 -10  -4    0.29    0.11
  -5  10   4    0.12    0.18
   5  10  -4    0.16    0.11
   4 -10  -4    0.65    0.12
  -4  10   4    0.73    0.21
   4  10  -4    0.59    0.13
   3 -10  -4   -0.07    0.08
   3  10  -4    0.01    0.09
  -3  10   4    0.01    0.09
  -3  10   4   -0.03    0.16
   2 -10  -4    1.61    0.15
  -2 -10   4    1.18    0.10
  -2  10   4    1.63    0.13
  -2  10   4    1.67    0.15
   2  10  -4    1.80    0.17
   2  10  -4    1.80    0.11
  -2  10   4    1.83    0.20
   1 -10  -4    0.04    0.08
  -1 -10   4    0.08    0.07
   1  10  -4    0.10    0.08
   1  10  -4    0.10    0.04
  -1  10   4    0.06    0.08
   0 -10   4   -0.01    0.06
   0 -10   4   -0.01    0.07
   0 -10  -4    0.04    0.07
   0  10  -4    0.03    0.08
   0  10   4   -0.06    0.08
  -1 -10  -4    0.19    0.07
   1 -10   4    0.05    0.08
   1 -10   4    0.18    0.04
  -1  10  -4    0.15    0.09
   1  10   4    0.23    0.09
  -1  10  -4    0.34    0.10
  -2 -10  -4    1.92    0.14
   2 -10   4    1.76    0.17
   2 -10   4    1.64    0.12
  -2  10  -4    1.56    0.18
   2  10   4    2.01    0.19
   3 -10   4   18.57    0.43
   3 -10   4   18.80    0.52
   3  10   4   18.88    0.54
  -3  10  -4   19.45    0.60
   4 -10   4   -0.19    0.09
  -4  10  -4    0.00    0.17
   4  10   4    0.13    0.11
   5 -10   4    0.97    0.16
   5 -10   4    1.13    0.26
  -5  10  -4    0.82    0.29
   5  10   4    1.19    0.17
   5 -11  -4    0.07    0.11
  -5  11   4    0.03    0.17
   5  11  -4   -0.13    0.10
   4 -11  -4    0.03    0.09
  -4  11   4    0.16    0.11
   4  11  -4    0.08    0.10
  -4  11   4    0.03    0.16
   3 -11  -4    1.93    0.17
   3  11  -4    1.83    0.19
  -3  11   4    1.96    0.24
  -3  11   4    2.29    0.17
  -2 -11   4   -0.04    0.05
   2 -11  -4    0.04    0.07
  -2  11   4    0.05    0.07
   2  11  -4    0.06    0.09
  -2  11   4    0.06    0.07
   2  11  -4   -0.01    0.06
   1 -11  -4    9.14    0.31
  -1 -11   4    9.50    0.30
   1  11  -4    9.30    0.34
  -1  11   4    9.24    0.33
   1  11  -4    9.52    0.20
   0 -11  -4   -0.17    0.06
   0 -11   4   -0.01    0.07
   0  11   4   -0.06    0.08
   0  11  -4   -0.04    0.08
   1 -11   4    0.88    0.12
  -1 -11  -4    1.04    0.12
   1  11   4    1.09    0.14
  -1  11  -4    1.09    0.13
  -1  11  -4    1.39    0.15
   2 -11   4   27.15    0.67
   2 -11   4   27.49    0.51
  -2 -11  -4   28.12    0.59
   2  11   4   28.06    0.70
  -2  11  -4   27.26    0.69
   3 -11   4    5.61    0.26
   3 -11   4    6.28    0.23
   3  11   4    5.70    0.29
  -3  11  -4    6.02    0.35
   4 -11   4   -0.04    0.10
  -4  11  -4   -0.09    0.19
   4  11   4   -0.09    0.09
   5 -11   4    0.24    0.13
   5 -11   4    0.55    0.23
   5  11   4    0.43    0.13
  -5  11  -4    0.25    0.26
   5 -12  -4    0.11    0.11
  -5  12   4    0.20    0.20
   5  12  -4    0.08    0.11
   4 -12  -4    2.35    0.20
  -4  12   4    2.83    0.22
   4  12  -4    2.42    0.21
  -4  12   4    2.24    0.28
   3 -12  -4    1.76    0.18
  -3  12   4    1.70    0.23
  -3  12   4    2.14    0.17
   3  12  -4    1.69    0.18
  -2 -12   4    0.19    0.07
   2 -12  -4    0.28    0.09
  -2  12   4    0.14    0.09
   2  12  -4    0.14    0.07
   2  12  -4    0.11    0.09
  -2  12   4    0.31    0.09
  -1 -12   4    0.35    0.09
   1 -12  -4    0.58    0.10
   1  12  -4    0.30    0.05
   1  12  -4    0.21    0.10
  -1  12   4    0.18    0.09
   0 -12   4    0.43    0.10
   0 -12  -4    0.44    0.10
   0  12   4    0.36    0.10
   0  12  -4    0.55    0.12
  -1 -12  -4    4.09    0.22
   1 -12   4    3.86    0.23
   1  12   4    4.33    0.24
  -1  12  -4    3.99    0.24
  -1  12  -4    3.98    0.24
   2 -12   4   31.10    0.75
   2 -12   4   31.65    0.56
  -2 -12  -4   32.27    0.67
  -2  12  -4   30.63    0.77
   2  12   4   31.58    0.78
   3 -12   4    0.19    0.10
   3 -12   4    0.13    0.10
   3  12   4    0.18    0.11
  -3  12  -4    0.05    0.16
   4 -12   4   -0.05    0.10
   4  12   4    0.09    0.11
  -4  12  -4    0.05    0.19
   5 -12   4    1.44    0.19
   5 -12   4    1.51    0.28
  -5  12  -4    1.49    0.31
   5  12   4    1.60    0.20
   5 -13  -4    0.66    0.14
  -5  13   4    0.51    0.22
   5  13  -4    0.43    0.14
   4 -13  -4    2.01    0.19
  -4  13   4    2.03    0.29
  -4  13   4    2.37    0.21
   4  13  -4    2.15    0.22
   3 -13  -4    0.25    0.10
  -3  13   4    0.18    0.10
   3  13  -4   -0.14    0.10
  -3  13   4    0.04    0.16
   2 -13  -4    2.10    0.18
  -2 -13   4    1.67    0.15
  -2  13   4    2.00    0.16
   2  13  -4    1.65    0.18
  -2  13   4    1.95    0.19
   2  13  -4    1.67    0.12
  -1 -13   4   -0.02    0.08
   1 -13  -4    0.01    0.08
  -1  13   4   -0.02    0.08
   1  13  -4    0.08    0.04
   1  13  -4    0.00    0.08
   0 -13  -4    5.83    0.26
   0 -13   4    6.06    0.26
   0  13   4    5.84    0.27
   0  13  -4    6.13    0.28
  -1 -13  -4    0.14    0.09
   1 -13   4    0.11    0.10
  -1  13  -4    0.20    0.11
  -1  13  -4    0.28    0.13
   1  13   4    0.27    0.11
   2 -13   4    2.41    0.20
   2 -13   4    2.37    0.12
   2  13   4    2.63    0.22
  -2  13  -4    2.31    0.17
  -2  13  -4    2.23    0.22
   3 -13   4    1.80    0.18
  -3  13  -4    1.85    0.24
   3  13   4    1.58    0.18
   4 -13   4    0.33    0.12
   4  13   4    0.44    0.13
  -4  13  -4    0.34    0.21
   5 -14  -4    0.84    0.16
  -5  14   4    0.80    0.26
   5  14  -4    0.67    0.16
   4 -14  -4    4.74    0.27
   4  14  -4    4.66    0.29
  -4  14   4    4.35    0.25
  -4  14   4    4.75    0.37
   3 -14  -4    8.53    0.34
  -3  14   4    9.08    0.45
  -3  14   4    9.06    0.32
   3  14  -4    8.43    0.37
   2 -14  -4   25.08    0.65
  -2 -14   4   24.71    0.58
  -2  14   4   25.51    0.62
   2  14  -4   25.35    0.68
   2  14  -4   25.47    0.50
  -2  14   4   24.72    0.56
  -1 -14   4    2.18    0.18
  -1 -14   4    2.00    0.18
   1 -14  -4    1.91    0.17
   1  14  -4    2.06    0.09
   1  14  -4    1.78    0.18
  -1  14   4    2.08    0.21
   0 -14   4   20.67    0.55
   0 -14  -4   20.04    0.54
   0  14   4   20.91    0.59
   0  14  -4   20.89    0.59
  -1 -14  -4    7.59    0.29
   1 -14   4    7.17    0.31
  -1  14  -4    8.36    0.33
   1  14   4    7.53    0.33
  -1  14  -4    7.88    0.33
   2 -14   4    4.98    0.26
   2 -14   4    4.50    0.15
  -2  14  -4    4.49    0.32
   2  14   4    4.74    0.27
   3 -14   4    0.91    0.14
  -3  14  -4    1.08    0.21
   3  14   4    0.99    0.16
   4 -14   4    0.19    0.11
   4  14   4    0.05    0.12
  -4  14  -4    0.12    0.21
   5 -15  -4    0.41    0.14
  -5  15   4    0.19    0.22
   5  15  -4    0.29    0.14
   4 -15  -4    0.36    0.13
   4  15  -4    0.34    0.14
  -4  15   4    0.40    0.13
  -4  15   4    0.44    0.22
   3 -15  -4    0.32    0.12
  -3  15   4    0.15    0.17
   3  15  -4    0.26    0.13
  -3  15   4    0.21    0.11
   2 -15  -4   17.41    0.52
  -2 -15   4   17.09    0.46
   2  15  -4   17.04    0.55
   2  15  -4   17.21    0.39
  -2  15   4   17.40    0.50
  -2  15   4   17.10    0.43
  -1 -15   4    0.06    0.10
  -1 -15   4    0.03    0.09
   1 -15  -4   -0.01    0.09
   1  15  -4    0.06    0.04
   1  15  -4    0.05    0.11
  -1  15   4    0.08    0.11
   0 -15  -4    0.40    0.11
   0 -15   4    0.27    0.11
   0  15  -4    0.27    0.13
   0  15   4    0.37    0.13
  -1 -15  -4    3.99    0.22
   1 -15   4    3.83    0.22
  -1  15  -4    3.86    0.27
  -1  15  -4    3.31    0.24
   1  15   4    3.80    0.26
   2 -15   4   12.44    0.42
  -2  15  -4   13.14    0.47
   2  15   4   12.57    0.45
   3 -15   4    0.55    0.13
   3  15   4    0.52    0.14
  -3  15  -4    0.52    0.19
   4 -15   4    0.45    0.14
   4  15   4    0.42    0.14
  -4  15  -4    0.47    0.22
   4 -16  -4    0.20    0.12
  -4  16   4    0.16    0.20
   4  16  -4    0.10    0.13
  -4  16   4    0.16    0.12
   3 -16  -4    0.76    0.14
  -3  16   4    0.99    0.22
  -3  16   4    0.88    0.14
   3  16  -4    0.93    0.16
   2 -16  -4    7.22    0.32
  -2 -16   4    6.91    0.29
   2  16  -4    7.11    0.37
   2  16  -4    7.43    0.24
  -2  16   4    7.78    0.34
  -2  16   4    7.33    0.28
   1 -16  -4    4.02    0.25
  -1 -16   4    4.17    0.24
  -1 -16   4    4.71    0.24
   1  16  -4    3.92    0.12
  -1  16   4    4.25    0.29
   1  16  -4    4.01    0.28
   0 -16  -4    2.08    0.20
   0 -16   4    1.37    0.17
   0  16   4    2.22    0.24
   0  16  -4    1.88    0.20
   1 -16   4    2.02    0.21
  -1 -16  -4    2.12    0.19
  -1  16  -4    2.39    0.23
   1  16   4    2.20    0.21
   2 -16   4    1.16    0.16
   2  16   4    0.86    0.15
  -2  16  -4    1.34    0.20
   3 -16   4   -0.10    0.10
  -3  16  -4   -0.06    0.17
   3  16   4   -0.02    0.11
   4 -16   4   -0.12    0.12
   4  16   4    0.27    0.14
  -4  16  -4    0.00    0.20
   4 -17  -4    5.73    0.30
  -4  17   4    5.38    0.28
  -4  17   4    6.00    0.43
   4  17  -4    6.10    0.35
   3 -17  -4    8.55    0.36
  -3  17   4    7.66    0.46
  -3  17   4    8.45    0.32
   3  17  -4    8.10    0.38
   2 -17  -4   63.42    1.37
  -2  17   4   62.34    1.16
   2  17  -4   62.25    1.41
   2  17  -4   65.12    1.09
  -2  17   4   63.51    1.34
   1 -17  -4   55.65    1.26
  -1 -17   4   58.97    1.25
  -1 -17   4   60.70    1.24
  -1  17   4   60.13    1.30
   1  17  -4   58.92    1.33
   1  17  -4   57.22    0.94
   0 -17   4   23.38    0.63
   0 -17  -4   22.70    0.61
   0  17   4   23.52    0.67
   0  17  -4   23.46    0.68
   1 -17   4    0.89    0.14
  -1 -17  -4    1.13    0.15
   1  17   4    0.92    0.16
  -1  17  -4    0.86    0.16
   2 -17   4    2.34    0.22
  -2  17  -4    2.25    0.25
   2  17   4    2.29    0.23
   3 -17   4   -0.01    0.12
   3  17   4   -0.01    0.11
  -3  17  -4    0.27    0.20
   4 -17   4   -0.09    0.11
   4  17   4    0.10    0.13
  -4  17  -4    0.11    0.23
   4 -18  -4    0.04    0.12
  -4  18   4    0.04    0.12
   4  18  -4   -0.07    0.13
  -4  18   4    0.23    0.21
   3 -18  -4    2.28    0.22
  -3  18   4    2.19    0.18
  -3  18   4    1.91    0.29
   3  18  -4    2.04    0.22
   2 -18  -4   53.80    1.23
  -2  18   4   57.00    1.21
   2  18  -4   55.41    0.96
   2  18  -4   53.35    1.27
  -2  18   4   54.03    1.04
   1 -18  -4   12.52    0.46
  -1 -18   4   12.27    0.43
  -1  18   4   12.94    0.48
   1  18  -4   11.99    0.50
   1  18  -4   12.05    0.25
   0 -18   4    5.13    0.30
   0 -18  -4    5.68    0.31
   0  18  -4    5.52    0.36
   0  18   4    5.43    0.32
   1 -18   4    0.44    0.14
  -1 -18  -4    0.47    0.13
   1  18   4    0.52    0.15
  -1  18  -4    0.49    0.15
   2 -18   4    0.46    0.14
  -2  18  -4    0.58    0.18
   2  18   4    0.24    0.13
   3 -18   4    0.10    0.13
  -3  18  -4    0.14    0.19
   3  18   4    0.03    0.13
   4 -18   4    0.21    0.15
  -4  18  -4    0.16    0.23
   4  18   4    0.30    0.15
   4 -19  -4    0.00    0.12
   4  19  -4    0.34    0.15
  -4  19   4    0.14    0.20
  -4  19   4    0.22    0.12
   3 -19  -4    0.17    0.13
  -3  19   4    0.09    0.11
  -3  19   4    0.14    0.20
   3  19  -4   -0.14    0.12
   2 -19  -4    1.54    0.19
   2  19  -4    1.62    0.13
   2  19  -4    1.16    0.20
  -2  19   4    1.47    0.16
   1 -19  -4    0.42    0.16
  -1 -19   4    0.68    0.16
   1  19  -4    0.57    0.18
   1  19  -4    0.52    0.07
  -1  19   4    0.51    0.16
   0 -19  -4   51.43    1.17
   0 -19   4   51.62    1.16
   0 -19   4   52.50    1.17
   0  19   4   52.47    1.22
   0  19  -4   51.57    1.22
   1 -19   4    0.59    0.15
  -1 -19  -4    0.46    0.13
  -1  19  -4    0.51    0.16
   1  19   4    0.51    0.16
   2 -19   4    6.04    0.32
  -2  19  -4    6.38    0.37
   2  19   4    5.73    0.34
   3 -19   4    0.01    0.13
  -3  19  -4    0.09    0.19
   3  19   4    0.14    0.14
   4 -19   4    0.05    0.15
  -4  19  -4    0.12    0.24
   4  19   4    0.35    0.16
   4 -20  -4    0.07    0.14
  -4  20   4    0.46    0.15
  -4  20   4    0.40    0.23
   4  20  -4    0.47    0.17
   3 -20  -4    0.90    0.17
   3  20  -4    0.82    0.18
  -3  20   4    0.79    0.15
  -3  20   4    1.06    0.25
   2 -20  -4    1.12    0.18
  -2  20   4    1.32    0.15
   2  20  -4    0.92    0.18
   1 -20  -4   20.49    0.63
  -1 -20   4   21.03    0.60
   1  20  -4   20.77    0.68
  -1  20   4   21.51    0.66
   0 -20   4   70.77    1.51
   0 -20   4   70.03    1.51
   0 -20  -4   70.28    1.51
   0  20   4   70.76    1.57
   0  20  -4   71.01    1.57
  -1 -20  -4    9.65    0.38
   1 -20   4    9.63    0.40
  -1  20  -4   10.09    0.43
   1  20   4    9.36    0.43
   2 -20   4    0.09    0.13
   2  20   4   -0.03    0.13
  -2  20  -4    0.02    0.17
   3 -20   4    0.24    0.15
  -3  20  -4    0.41    0.22
   3  20   4    0.58    0.17
   4 -20   4    0.55    0.18
  -4  20  -4    0.40    0.26
   4  20   4    0.44    0.18
   4 -21  -4    0.17    0.14
   4  21  -4    0.10    0.15
  -4  21   4    0.38    0.22
  -4  21   4    0.39    0.15
   3 -21  -4    2.66    0.25
   3  21  -4    2.67    0.27
  -3  21   4    2.88    0.22
  -3  21   4    2.37    0.32
   2 -21  -4    0.27    0.14
   2  21  -4    0.10    0.15
  -2  21   4    0.27    0.10
   1 -21  -4    2.69    0.28
  -1 -21   4    3.05    0.27
   1  21  -4    2.83    0.29
  -1  21   4    2.58    0.27
   0 -21   4   23.95    0.67
   0 -21  -4   24.03    0.69
   0 -21   4   23.06    0.67
   0  21  -4   23.89    0.74
   0  21   4   23.38    0.72
   1 -21   4   -0.21    0.14
  -1 -21  -4   -0.25    0.11
   1  21   4    0.08    0.15
  -1  21  -4    0.03    0.14
   2 -21   4   -0.04    0.13
  -2  21  -4    0.01    0.19
   2  21   4   -0.02    0.13
   3 -21   4   -0.07    0.14
   3  21   4   -0.10    0.14
  -3  21  -4   -0.04    0.20
   4 -22  -4    0.89    0.19
   4  22  -4    1.10    0.22
  -4  22   4    1.24    0.29
  -4  22   4    1.17    0.19
   3 -22  -4    0.02    0.12
   3  22  -4   -0.03    0.13
  -3  22   4   -0.08    0.11
  -3  22   4   -0.01    0.20
   2 -22  -4   -0.07    0.11
  -2  22   4   -0.10    0.10
   2  22  -4    0.10    0.15
   1 -22  -4   10.06    0.43
  -1 -22   4   10.09    0.40
   1  22  -4    8.99    0.46
  -1  22   4   10.00    0.45
   0 -22   4   -0.19    0.15
   0 -22   4    0.00    0.13
   0 -22  -4    0.00    0.14
   0  22   4   -0.12    0.15
   0  22  -4    0.06    0.16
   1 -22   4    4.75    0.30
   1 -22   4    4.80    0.31
  -1 -22  -4    4.44    0.29
   1  22   4    4.62    0.33
  -1  22  -4    4.81    0.33
   2 -22   4    1.98    0.23
  -2  22  -4    2.20    0.29
   2  22   4    1.80    0.24
   3 -22   4    3.88    0.30
   3  22   4    3.61    0.33
  -3  22  -4    4.17    0.40
   3 -23  -4    0.34    0.15
   3  23  -4    0.37    0.17
  -3  23   4    0.10    0.23
  -3  23   4    0.48    0.14
   2 -23  -4   -0.07    0.13
   2  23  -4   -0.01    0.14
  -2  23   4    0.01    0.09
  -1 -23   4    0.76    0.16
   1 -23  -4    0.69    0.17
  -1  23   4    0.81    0.19
   1  23  -4    0.69    0.20
   0 -23   4    3.62    0.29
   0 -23  -4    3.66    0.30
   0  23  -4    3.47    0.34
   0  23   4    3.25    0.34
   1 -23   4    0.65    0.16
   1 -23   4    0.52    0.17
  -1  23  -4    0.78    0.19
   1  23   4    0.75    0.21
   2 -23   4    0.07    0.14
   2 -23   4   -0.14    0.14
  -2  23  -4    0.19    0.21
   2  23   4    0.13    0.16
   3 -23   4    2.27    0.25
   3  23   4    2.42    0.28
  -3  23  -4    2.81    0.35
   3 -24  -4    0.47    0.17
   3  24  -4    0.63    0.19
  -3  24   4    0.42    0.14
  -3  24   4    0.35    0.24
   2 -24  -4    0.03    0.12
   2  24  -4    0.15    0.17
  -2  24   4    0.18    0.11
   1 -24  -4    3.46    0.30
  -1 -24   4    3.23    0.27
   1  24  -4    3.69    0.34
  -1  24   4    4.13    0.33
   0 -24   4    0.57    0.16
   0 -24  -4    0.18    0.15
   0  24  -4    0.35    0.17
   0  24   4    0.12    0.17
   1 -24   4    5.63    0.35
   1 -24   4    5.90    0.35
   1  24   4    6.08    0.41
  -1  24  -4    5.89    0.39
   2 -24   4    0.53    0.18
   2 -24   4    0.48    0.19
  -2  24  -4    0.62    0.24
   2  24   4    0.42    0.19
   3 -24   4    1.29    0.22
   3 -24   4    1.08    0.20
   3  24   4    1.11    0.23
  -3  24  -4    1.62    0.30
   3 -25  -4   -0.08    0.14
  -3  25   4    0.07    0.12
  -3  25   4   -0.25    0.23
   3  25  -4   -0.06    0.16
   2 -25  -4    0.36    0.17
  -2  25   4    0.49    0.13
   2  25  -4    0.48    0.19
   1 -25  -4    0.33    0.15
  -1  25   4    0.33    0.17
   1  25  -4    0.06    0.18
   0 -25   4   -0.05    0.13
   0 -25  -4   -0.04    0.14
   0  25  -4    0.02    0.16
   0  25   4   -0.15    0.15
   1 -25   4    1.02    0.21
   1 -25   4    1.33    0.20
   1  25   4    1.58    0.26
   2 -25   4   -0.18    0.15
   2 -25   4   -0.09    0.14
  -2  25  -4   -0.03    0.22
   2  25   4   -0.04    0.17
   3 -25   4    0.62    0.19
   3 -25   4    0.61    0.19
  -3  25  -4    0.99    0.27
   3  25   4    1.01    0.22
   3 -26  -4    0.00    0.16
   3  26  -4   -0.14    0.17
  -3  26   4   -0.02    0.12
  -3  26   4    0.00    0.23
   2 -26  -4    0.07    0.15
  -2  26   4   -0.08    0.11
   2  26  -4    0.12    0.18
   1 -26  -4    2.75    0.29
  -1  26   4    1.96    0.26
   1  26  -4    2.07    0.29
   0 -26   4    0.00    0.15
   0 -26  -4    0.10    0.14
   0  26  -4    0.04    0.18
   0  26   4    0.11    0.18
   1 -26   4    0.18    0.15
   1  26   4   -0.09    0.18
   2 -26   4    0.92    0.21
   2 -26   4    0.89    0.22
  -2  26  -4    1.03    0.28
   2  26   4    1.18    0.25
   2 -27  -4    3.39    0.32
   2  27  -4    3.49    0.36
  -2  27   4    3.75    0.25
   1 -27  -4    0.17    0.17
  -1  27   4    0.17    0.18
   1  27  -4    0.16    0.21
   0 -27  -4    1.86    0.25
   0 -27   4    1.79    0.24
   0  27   4    1.82    0.28
   0  27  -4    1.77    0.26
   1 -27   4    2.86    0.31
   1  27   4    2.69    0.33
   2 -27   4    2.97    0.31
  -2  27  -4    2.35    0.34
   2  27   4    2.69    0.32
   2 -28  -4   -0.04    0.17
  -2  28   4   -0.14    0.12
   2  28  -4   -0.09    0.19
   1 -28  -4    0.19    0.17
   1  28  -4    0.34    0.20
   0 -28  -4    0.24    0.18
   0 -28   4    0.24    0.17
   0  28   4    0.25    0.20
   0  28  -4    0.38    0.21
   1 -28   4    0.11    0.17
   1  28   4    0.04    0.20
   2 -28   4    0.34    0.18
  -2  28  -4    0.11    0.27
   2  28   4    0.47    0.22
   1 -29  -4    0.06    0.18
   1  29  -4    0.33    0.22
   0 -29   4    6.94    0.41
   0  29   4    6.62    0.44
   0  29  -4    6.50    0.47
   1 -29   4    0.21    0.18
   1  29   4    0.23    0.21
   1 -30  -4    0.08    0.18
   1  30  -4    0.08    0.22
   0 -30   4    0.28    0.18
   0  30   4    0.34    0.22
   0  30  -4    0.22    0.22
   5   0  -5   -0.06    0.09
  -5   0   5   -0.19    0.16
  -4   0   5   -0.12    0.15
   4   0  -5   -0.27    0.09
  -3   0   5   -0.07    0.09
  -3   0   5   -0.28    0.14
   3   0  -5   -0.29    0.09
  -2   0   5   -0.02    0.07
  -2   0   5    0.05    0.07
   2   0  -5   -0.02    0.06
  -2   0   5   -0.08    0.04
   1   0  -5   -0.16    0.06
  -1   0   5   -0.07    0.05
  -1   0   5   -0.01    0.05
  -1   0   5   -0.15    0.07
   0   0   5   -0.13    0.06
   0   0  -5   -0.14    0.06
   1   0   5    0.05    0.09
   1   0   5    0.01    0.06
  -1   0  -5   -0.07    0.07
   2   0   5    0.48    0.16
   2   0   5   -0.23    0.10
  -2   0  -5   -0.03    0.07
   3   0   5    1.09    0.18
   4   0   5   -0.02    0.09
   4   0   5   -0.11    0.17
   5   0   5   -0.12    0.17
   5   0   5   -0.03    0.11
   5  -1  -5    0.41    0.12
  -5  -1   5    0.29    0.21
   5   1  -5    0.31    0.12
  -5   1   5    0.43    0.21
  -4  -1   5    0.02    0.16
   4  -1  -5   -0.15    0.09
   4   1  -5   -0.19    0.09
  -4   1   5   -0.05    0.16
   3  -1  -5   10.28    0.36
   3  -1  -5   10.57    0.36
  -3  -1   5   10.85    0.41
  -3   1   5   10.75    0.34
   3   1  -5   11.04    0.36
   3   1  -5   10.72    0.37
  -3   1   5   10.97    0.43
  -2  -1   5    1.06    0.10
  -2  -1   5    1.46    0.15
  -2  -1   5    1.41    0.12
   2  -1  -5    1.37    0.13
  -2   1   5    1.43    0.12
  -2   1   5    1.35    0.11
   2   1  -5    1.33    0.14
  -2   1   5    1.56    0.16
  -1  -1   5   39.64    0.71
  -1  -1   5   39.55    0.78
  -1  -1   5   40.37    0.85
   1  -1  -5   40.51    0.87
  -1   1   5   39.46    0.81
  -1   1   5   40.87    0.86
  -1   1   5   39.94    0.72
   1   1  -5   40.93    0.88
   0  -1  -5    0.14    0.08
   0  -1   5    0.17    0.08
   0   1  -5    0.15    0.08
   0   1   5    0.16    0.08
  -1  -1  -5    6.61    0.24
   1  -1   5    6.32    0.21
   1  -1   5    6.70    0.27
   1  -1   5    6.48    0.25
   1   1   5    6.64    0.27
  -1   1  -5    6.45    0.25
   1   1   5    6.72    0.26
   2  -1   5   65.29    1.47
  -2  -1  -5   67.49    1.24
   2  -1   5   65.19    1.34
  -2   1  -5   67.94    1.24
   2   1   5   63.87    1.34
   2   1   5   65.03    1.47
   3  -1   5  145.25    3.01
   3  -1   5  143.63    2.73
   3   1   5  144.74    2.74
   3   1   5  141.43    3.00
   4  -1   5    0.36    0.11
   4  -1   5    0.10    0.17
   4   1   5    0.23    0.11
   4   1   5    0.18    0.17
   5  -1   5    0.35    0.12
   5  -1   5    0.49    0.21
   5   1   5    0.26    0.21
   5   1   5    0.42    0.13
   5  -2  -5    0.07    0.10
  -5  -2   5   -0.04    0.18
   5   2  -5    0.04    0.10
  -5   2   5    0.33    0.20
   4  -2  -5    3.02    0.21
  -4  -2   5    3.68    0.29
  -4   2   5    3.39    0.32
   4   2  -5    2.99    0.22
   3  -2  -5   23.00    0.59
  -3  -2   5   22.24    0.62
   3  -2  -5   22.55    0.57
  -3   2   5   22.91    0.55
  -3   2   5   21.56    0.65
   3   2  -5   21.66    0.57
   3   2  -5   23.32    0.58
  -2  -2   5    5.61    0.20
  -2  -2   5    5.56    0.23
   2  -2  -5    5.45    0.23
  -2  -2   5    4.86    0.18
  -2   2   5    5.56    0.26
   2   2  -5    5.57    0.23
  -2   2   5    5.52    0.20
  -2   2   5    5.08    0.20
  -1  -2   5   23.59    0.56
  -1  -2   5   23.60    0.46
   1  -2  -5   23.86    0.58
  -1  -2   5   23.66    0.49
   1   2  -5   24.28    0.59
  -1   2   5   23.85    0.57
  -1   2   5   23.91    0.53
  -1   2   5   23.71    0.47
   0  -2   5    5.02    0.22
   0  -2  -5    5.16    0.22
   0   2  -5    5.01    0.23
   0   2   5    4.85    0.21
  -1  -2  -5    7.85    0.27
   1  -2   5    7.94    0.28
   1  -2   5    8.31    0.30
   1  -2   5    7.69    0.23
   1   2   5    8.29    0.29
  -1   2  -5    8.06    0.28
   2  -2   5    0.94    0.13
   2  -2   5    1.07    0.17
   2   2   5    1.02    0.18
  -2   2  -5    1.39    0.12
   3  -2   5    0.00    0.14
   4  -2   5   -0.01    0.18
   4  -2   5    0.13    0.10
   4   2   5    0.18    0.17
   4   2   5    0.07    0.10
   5  -2   5    0.06    0.11
   5  -2   5    0.03    0.18
   5   2   5   -0.09    0.19
   5   2   5   -0.25    0.10
   5  -3  -5    5.33    0.26
  -5  -3   5    5.60    0.41
   5   3  -5    4.90    0.26
  -5   3   5    5.02    0.38
   4  -3  -5   24.72    0.62
  -4  -3   5   24.74    0.73
   4   3  -5   23.85    0.62
  -4   3   5   24.74    0.75
  -3  -3   5   73.75    1.55
   3  -3  -5   75.39    1.50
   3   3  -5   77.34    1.50
   3   3  -5   75.48    1.51
  -3   3   5   72.41    1.34
  -3   3   5   73.33    1.58
  -2  -3   5   11.07    0.30
   2  -3  -5   11.45    0.35
  -2  -3   5   10.75    0.29
  -2  -3   5   11.48    0.34
  -2   3   5   10.80    0.30
   2   3  -5   11.46    0.35
  -2   3   5   11.42    0.31
  -2   3   5   11.12    0.37
   2   3  -5   11.30    0.29
   1  -3  -5   33.96    0.76
  -1  -3   5   33.66    0.73
  -1  -3   5   33.81    0.65
  -1  -3   5   32.85    0.60
  -1   3   5   33.89    0.74
   1   3  -5   34.23    0.76
   1   3  -5   32.86    0.72
   0  -3  -5    8.89    0.29
   0  -3   5    8.62    0.30
   0   3  -5    8.52    0.30
   0   3   5    8.30    0.29
   1  -3   5    1.13    0.13
  -1  -3  -5    1.12    0.11
   1  -3   5    1.19    0.11
   1  -3   5    1.06    0.12
  -1   3  -5    1.19    0.12
   1   3   5    1.64    0.15
   2  -3   5    7.35    0.33
  -2  -3  -5    6.88    0.22
   2  -3   5    7.54    0.28
  -2   3  -5    7.74    0.22
   2   3   5    7.58    0.34
   2   3   5    7.25    0.30
   3  -3   5   29.93    0.86
   3  -3   5   31.79    0.75
   3   3   5   33.76    0.89
   3   3   5   30.29    0.77
  -3   3  -5   31.75    0.82
   4  -3   5   -0.07    0.18
   4  -3   5    0.31    0.11
   4   3   5    0.17    0.11
   4   3   5    0.27    0.18
   5  -3   5    0.28    0.12
   5  -3   5    0.38    0.22
   5   3   5    0.30    0.19
   5   3   5    0.12    0.12
  -5  -4   5    2.26    0.31
   5  -4  -5    2.76    0.21
  -5   4   5    2.61    0.31
   5   4  -5    2.37    0.21
   4  -4  -5   10.88    0.37
  -4  -4   5   11.26    0.47
   4   4  -5   10.16    0.37
  -4   4   5   11.92    0.50
   3  -4  -5  140.59    2.66
  -3  -4   5  140.06    2.70
  -3   4   5  137.70    2.33
   3   4  -5  142.44    2.67
  -3   4   5  139.96    2.74
   2  -4  -5    7.38    0.27
  -2  -4   5    7.61    0.27
  -2  -4   5    7.67    0.24
  -2  -4   5    7.37    0.23
  -2   4   5    7.48    0.24
  -2   4   5    7.39    0.25
   2   4  -5    7.18    0.28
  -2   4   5    7.56    0.31
   2   4  -5    7.65    0.22
  -1  -4   5    4.92    0.16
   1  -4  -5    4.66    0.21
  -1  -4   5    4.71    0.22
   1   4  -5    4.80    0.17
   1   4  -5    4.52    0.23
  -1   4   5    4.76    0.22
   0  -4   5   31.82    0.72
   0  -4  -5   31.34    0.72
   0   4  -5   31.16    0.73
   0   4  -5   31.39    0.71
   0   4   5   31.43    0.72
   1  -4   5    3.39    0.15
   1  -4   5    2.99    0.19
  -1  -4  -5    3.04    0.17
   1  -4   5    3.25    0.19
  -1   4  -5    3.43    0.19
   1   4   5    3.26    0.20
   2  -4   5    0.45    0.10
  -2  -4  -5    0.19    0.07
   2  -4   5    0.45    0.15
   2   4   5   -0.01    0.10
  -2   4  -5    0.39    0.07
   2   4   5    0.67    0.17
  -2   4  -5    0.35    0.14
   3  -4   5   54.09    1.15
   3  -4   5   51.70    1.29
  -3   4  -5   56.58    1.22
   3   4   5   52.70    1.16
   3   4   5   54.69    1.30
   4  -4   5    1.91    0.27
   4  -4   5    2.08    0.19
   4   4   5    2.37    0.28
   4   4   5    1.85    0.19
  -4   4  -5    2.02    0.29
   5  -4   5    0.17    0.12
   5  -4   5    0.09    0.21
   5   4   5    0.34    0.21
   5   4   5    0.13    0.12
   5  -5  -5    0.28    0.12
  -5  -5   5    0.11    0.19
   5   5  -5    0.37    0.12
  -5   5   5    0.24    0.19
  -4  -5   5    1.99    0.25
   4  -5  -5    2.03    0.19
  -4   5   5    2.13    0.26
   4   5  -5    2.04    0.21
   3  -5  -5   10.68    0.38
  -3  -5   5   10.57    0.43
  -3   5   5   11.40    0.36
   3   5  -5   12.13    0.39
  -3   5   5   11.57    0.47
   2  -5  -5    4.06    0.21
  -2  -5   5    4.09    0.22
  -2  -5   5    4.29    0.18
   2   5  -5    4.34    0.18
  -2   5   5    4.33    0.19
  -2   5   5    4.52    0.19
  -2   5   5    3.99    0.26
   2   5  -5    4.43    0.22
  -1  -5   5    0.06    0.06
   1  -5  -5    0.16    0.08
  -1  -5   5   -0.12    0.07
   1   5  -5   -0.04    0.09
   1   5  -5   -0.14    0.06
  -1   5   5    0.01    0.07
   1   5  -5    0.11    0.06
   0  -5  -5   10.75    0.34
   0  -5   5   10.20    0.34
   0  -5   5   10.87    0.32
   0   5   5   10.34    0.34
   0   5  -5   10.12    0.35
  -1  -5  -5   -0.03    0.06
   1  -5   5    0.00    0.06
   1  -5   5   -0.01    0.09
   1   5   5    0.11    0.08
  -1   5  -5    0.00    0.07
  -2  -5  -5    0.63    0.08
   2  -5   5    0.74    0.16
   2  -5   5    0.62    0.11
   2   5   5    0.56    0.11
  -2   5  -5    0.78    0.09
   2   5   5    0.61    0.16
  -2   5  -5    0.76    0.14
   3  -5   5   12.39    0.41
   3  -5   5   13.40    0.52
  -3   5  -5   14.14    0.50
   3   5   5   11.48    0.43
   3   5   5   13.15    0.51
   4  -5   5    0.06    0.18
   4  -5   5    0.18    0.10
   4   5   5    0.04    0.10
  -4   5  -5    0.13    0.21
   4   5   5    0.36    0.18
   5  -5   5   -0.04    0.11
   5  -5   5   -0.10    0.17
   5   5   5   -0.10    0.11
   5   5   5   -0.21    0.17
   5  -6  -5   -0.02    0.10
   5   6  -5   -0.07    0.10
  -5   6   5    0.04    0.19
   4  -6  -5    2.97    0.21
  -4   6   5    3.29    0.32
   4   6  -5    3.20    0.23
   3  -6  -5    4.20    0.25
  -3   6   5    5.07    0.25
   3   6  -5    5.20    0.26
  -3   6   5    5.61    0.35
   2  -6  -5   26.99    0.66
  -2  -6   5   28.54    0.61
  -2   6   5   27.87    0.58
  -2   6   5   27.84    0.70
  -2   6   5   28.28    0.62
   2   6  -5   27.65    0.67
   2   6  -5   27.80    0.54
  -1  -6   5  130.73    2.45
   1  -6  -5  130.06    2.47
  -1  -6   5  130.04    2.05
   1   6  -5  131.40    2.53
  -1   6   5  129.62    2.46
   1   6  -5  129.80    2.34
   1   6  -5  127.11    2.49
   0  -6  -5  236.53    4.47
   0  -6   5  225.31    4.62
   0  -6   5  230.32    4.44
   0   6  -5  235.71    4.30
   0   6   5  233.50    4.51
   1  -6   5    9.72    0.32
   1  -6   5    9.38    0.33
  -1  -6  -5    9.68    0.31
  -1   6  -5    9.47    0.32
  -1   6  -5    9.11    0.26
   1   6   5    9.17    0.33
   2  -6   5    0.72    0.15
   2  -6   5    0.80    0.12
  -2  -6  -5    0.78    0.09
  -2   6  -5    0.82    0.10
   2   6   5    0.77    0.13
  -2   6  -5    0.84    0.14
   3  -6   5    0.59    0.19
   3  -6   5    0.52    0.13
   3   6   5    0.05    0.13
   3   6   5    0.82    0.19
  -3   6  -5    0.67    0.19
   4  -6   5   -0.05    0.09
   4  -6   5   -0.11    0.17
   4   6   5   -0.06    0.10
  -4   6  -5   -0.27    0.19
   4   6   5   -0.05    0.16
   5  -6   5   -0.06    0.11
   5  -6   5    0.00    0.20
  -5   6  -5   -0.52    0.24
   5   6   5    0.12    0.12
   5   6   5    0.08    0.19
   5  -7  -5    3.68    0.24
   5   7  -5    3.49    0.24
  -5   7   5    3.03    0.32
   4  -7  -5   10.72    0.37
   4   7  -5    9.86    0.37
  -4   7   5   10.61    0.49
   3  -7  -5   14.11    0.44
  -3   7   5   15.26    0.54
   3   7  -5   15.02    0.45
  -3   7   5   14.76    0.42
  -2  -7   5    9.94    0.28
   2  -7  -5    9.60    0.33
  -2   7   5    9.67    0.29
   2   7  -5    9.66    0.26
  -2   7   5    9.35    0.36
   2   7  -5    9.53    0.34
  -2   7   5    9.56    0.30
  -1  -7   5    4.63    0.22
  -1  -7   5    4.10    0.15
   1  -7  -5    4.42    0.22
   1   7  -5    4.35    0.24
   1   7  -5    3.95    0.16
  -1   7   5    4.19    0.23
   0  -7  -5   53.29    1.10
   0  -7   5   52.29    1.09
   0  -7   5   52.61    0.84
   0  -7   5   52.18    1.10
   0   7  -5   53.08    1.13
   0   7   5   50.83    1.11
  -1  -7  -5   10.23    0.32
   1  -7   5    9.56    0.33
   1  -7   5    9.81    0.34
  -1   7  -5   10.17    0.27
   1   7   5   10.29    0.35
  -1   7  -5   10.20    0.34
   2  -7   5    2.03    0.18
  -2  -7  -5    2.06    0.14
   2  -7   5    2.12    0.20
  -2   7  -5    1.72    0.15
  -2   7  -5    2.43    0.21
   2   7   5    2.38    0.19
   3  -7   5    8.08    0.31
   3  -7   5    7.82    0.38
   3   7   5    7.98    0.34
  -3   7  -5    8.39    0.38
   3   7   5    8.40    0.40
   4  -7   5   -0.01    0.10
   4  -7   5    0.07    0.18
   4   7   5    0.01    0.10
   4   7   5    0.06    0.17
  -4   7  -5   -0.08    0.20
   5  -7   5    0.12    0.12
   5  -7   5    0.08    0.19
   5   7   5    0.21    0.21
  -5   7  -5   -0.24    0.25
   5   7   5    0.03    0.12
   5  -8  -5    0.16    0.11
   5   8  -5   -0.07    0.11
  -5   8   5    0.46    0.21
   4  -8  -5    1.30    0.16
   4   8  -5    1.48    0.17
  -4   8   5    1.41    0.24
  -4   8   5    1.66    0.19
   3  -8  -5   17.39    0.50
   3   8  -5   16.90    0.49
  -3   8   5   16.59    0.56
  -3   8   5   17.90    0.47
   2  -8  -5    4.20    0.22
  -2  -8   5    4.41    0.19
   2   8  -5    4.44    0.24
   2   8  -5    4.28    0.17
  -2   8   5    3.69    0.28
  -2   8   5    4.19    0.19
  -2   8   5    3.88    0.21
   1  -8  -5    5.40    0.24
  -1  -8   5    5.31    0.23
   1   8  -5    5.71    0.27
   1   8  -5    5.41    0.18
  -1   8   5    5.00    0.25
   0  -8  -5    2.26    0.20
   0  -8   5    2.05    0.16
   0  -8   5    2.77    0.20
   0  -8   5    2.42    0.09
   0   8   5    2.15    0.22
   0   8  -5    2.71    0.20
   1  -8   5    4.67    0.23
  -1  -8  -5    4.46    0.22
   1  -8   5    4.40    0.23
  -1   8  -5    4.68    0.24
   1   8   5    4.78    0.25
  -1   8  -5    4.82    0.19
   2  -8   5    6.27    0.28
  -2  -8  -5    6.79    0.22
   2  -8   5    6.51    0.32
  -2   8  -5    6.85    0.29
   2   8   5    6.85    0.30
   3  -8   5    1.49    0.22
   3  -8   5    1.23    0.15
   3   8   5    1.35    0.17
  -3   8  -5    1.30    0.21
   4  -8   5    0.80    0.22
   4  -8   5    0.83    0.14
   4   8   5    0.77    0.20
   4   8   5    0.67    0.14
  -4   8  -5    0.97    0.24
   5  -8   5    0.02    0.11
   5  -8   5    0.05    0.20
   5   8   5    0.06    0.19
  -5   8  -5   -0.46    0.23
   5   8   5    0.15    0.12
   5  -9  -5    0.62    0.14
   5   9  -5    0.62    0.14
  -5   9   5    0.48    0.21
   4  -9  -5    6.52    0.30
  -4   9   5    6.69    0.31
  -4   9   5    6.46    0.39
   4   9  -5    7.05    0.32
   3  -9  -5   -0.16    0.09
   3   9  -5   -0.02    0.09
  -3   9   5    0.03    0.10
  -3   9   5    0.05    0.14
   2  -9  -5    2.31    0.18
  -2  -9   5    2.36    0.16
  -2   9   5    2.10    0.18
   2   9  -5    2.19    0.14
  -2   9   5    2.43    0.16
  -2   9   5    2.30    0.23
   2   9  -5    2.25    0.19
  -1  -9   5    3.01    0.19
   1  -9  -5    2.97    0.19
   1   9  -5    2.71    0.19
   1   9  -5    3.05    0.14
  -1   9   5    2.67    0.20
   0  -9   5    0.28    0.09
   0  -9   5    0.24    0.04
   0  -9  -5    0.04    0.10
   0  -9   5    0.15    0.09
   0   9  -5    0.22    0.06
   0   9   5    0.15    0.11
   0   9  -5    0.22    0.10
   1  -9   5    7.27    0.30
  -1  -9  -5    7.39    0.28
   1  -9   5    6.86    0.29
   1   9   5    7.53    0.31
  -1   9  -5    7.53    0.31
  -1   9  -5    7.46    0.25
   2  -9   5    1.99    0.22
  -2  -9  -5    1.93    0.15
   2  -9   5    1.96    0.19
  -2   9  -5    2.12    0.22
   2   9   5    2.13    0.20
   3  -9   5    6.03    0.28
   3  -9   5    6.59    0.35
   3   9   5    6.35    0.31
  -3   9  -5    6.20    0.34
   4  -9   5    1.75    0.27
   4  -9   5    1.08    0.16
   4   9   5    1.18    0.17
  -4   9  -5    1.31    0.25
   5 -10  -5    0.18    0.11
  -5  10   5   -0.02    0.18
   5  10  -5    0.02    0.11
   4 -10  -5    2.56    0.21
  -4  10   5    2.28    0.28
  -4  10   5    2.44    0.21
   4  10  -5    2.59    0.23
   3 -10  -5    1.11    0.14
  -3  10   5    1.25    0.20
   3  10  -5    1.07    0.15
  -3  10   5    1.21    0.15
  -2 -10   5   -0.03    0.07
   2 -10  -5    0.01    0.08
  -2 -10   5   -0.04    0.07
  -2  10   5    0.00    0.07
  -2  10   5    0.10    0.14
   2  10  -5   -0.01    0.06
  -2  10   5   -0.09    0.07
   2  10  -5   -0.08    0.07
  -1 -10   5    2.95    0.18
   1 -10  -5    2.76    0.18
   1  10  -5    2.89    0.15
   1  10  -5    3.11    0.22
  -1  10   5    3.23    0.21
   0 -10   5    6.15    0.23
   0 -10  -5    6.10    0.28
   0 -10   5    6.45    0.27
   0  10   5    6.31    0.29
   0  10  -5    6.82    0.29
  -1 -10  -5   36.04    0.79
   1 -10   5   34.64    0.81
   1 -10   5   34.60    0.84
  -1  10  -5   35.85    0.82
   1  10   5   33.91    0.83
  -1  10  -5   35.15    0.73
   2 -10   5    7.12    0.34
   2 -10   5    6.41    0.29
  -2  10  -5    6.67    0.30
   2  10   5    6.84    0.31
   3 -10   5    0.60    0.13
   3 -10   5    0.91    0.20
   3  10   5    0.46    0.13
  -3  10  -5    0.60    0.18
   4 -10   5    0.01    0.11
   4 -10   5    0.32    0.21
  -4  10  -5   -0.09    0.19
   4  10   5    0.05    0.12
   5 -11  -5   -0.01    0.11
   5  11  -5    0.10    0.12
  -5  11   5    0.08    0.19
   4 -11  -5    1.70    0.18
  -4  11   5    1.81    0.19
  -4  11   5    1.98    0.27
   4  11  -5    1.71    0.19
   3 -11  -5    0.01    0.09
  -3  11   5    0.21    0.16
   3  11  -5    0.08    0.11
  -3  11   5   -0.01    0.09
   2 -11  -5    4.03    0.24
  -2 -11   5    4.23    0.21
  -2 -11   5    4.16    0.20
   2  11  -5    3.90    0.17
   2  11  -5    3.90    0.25
  -2  11   5    4.34    0.22
  -2  11   5    4.51    0.20
   1 -11  -5   18.33    0.52
  -1 -11   5   18.79    0.50
  -1  11   5   18.63    0.52
   1  11  -5   18.68    0.54
   0 -11   5   23.92    0.57
   0 -11  -5   23.85    0.61
   0 -11   5   24.65    0.61
   0  11  -5   24.51    0.65
   0  11   5   23.54    0.64
   1 -11   5    2.88    0.22
  -1 -11  -5    3.12    0.22
   1 -11   5    3.28    0.08
   1 -11   5    3.28    0.22
   1  11   5    3.09    0.22
  -1  11  -5    3.42    0.24
  -1  11  -5    3.30    0.20
   2 -11   5    2.72    0.21
   2 -11   5    2.46    0.13
  -2  11  -5    2.76    0.25
   2  11   5    2.79    0.22
   3 -11   5    5.87    0.35
   3 -11   5    5.25    0.28
   3  11   5    5.74    0.29
  -3  11  -5    5.49    0.33
   4 -11   5    0.07    0.18
   4 -11   5    0.22    0.12
  -4  11  -5    0.23    0.21
   4  11   5    0.04    0.13
   5 -12  -5    0.29    0.13
  -5  12   5    0.49    0.21
   5  12  -5    0.27    0.14
   4 -12  -5   -0.04    0.10
   4  12  -5   -0.07    0.10
  -4  12   5    0.10    0.11
  -4  12   5   -0.20    0.16
   3 -12  -5    0.30    0.11
  -3  12   5    0.41    0.18
  -3  12   5    0.45    0.12
   3  12  -5    0.36    0.12
  -2 -12   5   14.82    0.41
   2 -12  -5   14.76    0.46
  -2 -12   5   14.94    0.40
   2  12  -5   14.97    0.34
   2  12  -5   14.56    0.48
  -2  12   5   15.17    0.44
  -2  12   5   14.79    0.40
  -1 -12   5    0.64    0.12
   1 -12  -5    0.57    0.12
  -1  12   5    0.49    0.12
   1  12  -5    0.58    0.13
   0 -12  -5    4.91    0.26
   0 -12   5    5.38    0.27
   0 -12   5    5.33    0.22
   0  12  -5    4.94    0.29
   0  12   5    5.11    0.28
  -1 -12  -5    0.01    0.09
   1 -12   5   -0.07    0.09
   1  12   5   -0.14    0.08
  -1  12  -5   -0.06    0.10
  -1  12  -5   -0.07    0.10
   2 -12   5   10.00    0.37
   2 -12   5    9.94    0.24
  -2  12  -5    9.69    0.38
   2  12   5   10.46    0.39
   3 -12   5    3.41    0.23
  -3  12  -5    3.35    0.32
   3  12   5    3.64    0.26
   4 -12   5    4.79    0.28
   4 -12   5    4.66    0.35
  -4  12  -5    4.94    0.38
   4  12   5    4.60    0.29
   5 -13  -5   -0.05    0.11
  -5  13   5    0.02    0.20
   5  13  -5   -0.10    0.11
   4 -13  -5   -0.05    0.10
  -4  13   5    0.11    0.12
  -4  13   5    0.34    0.18
   4  13  -5    0.12    0.12
   3 -13  -5    9.48    0.37
   3  13  -5    9.76    0.40
  -3  13   5    9.59    0.34
  -3  13   5    9.11    0.46
   2 -13  -5    3.80    0.24
  -2 -13   5    3.06    0.21
  -2  13   5    3.73    0.24
   2  13  -5    3.06    0.26
   2  13  -5    3.45    0.16
  -2  13   5    3.89    0.21
   1 -13  -5   17.42    0.51
  -1 -13   5   17.24    0.48
  -1  13   5   16.70    0.51
   1  13  -5   17.01    0.54
   0 -13   5    1.76    0.17
   0 -13  -5    1.53    0.17
   0 -13   5    1.93    0.15
   0  13  -5    1.72    0.19
   0  13   5    1.56    0.17
   1 -13   5    0.06    0.09
  -1 -13  -5    0.06    0.10
   1  13   5    0.14    0.11
  -1  13  -5    0.10    0.11
  -1  13  -5    0.00    0.11
   2 -13   5    9.19    0.22
   2 -13   5    9.13    0.36
   2  13   5    9.24    0.38
  -2  13  -5    9.53    0.38
   3 -13   5    6.36    0.31
  -3  13  -5    7.25    0.39
   3  13   5    6.01    0.32
   4 -13   5   -0.10    0.19
   4 -13   5   -0.06    0.12
  -4  13  -5    0.17    0.21
   4  13   5    0.16    0.13
   5 -14  -5    0.00    0.12
   5  14  -5    0.06    0.13
  -5  14   5    0.17    0.20
   4 -14  -5   -0.04    0.10
  -4  14   5    0.03    0.12
   4  14  -5    0.08    0.13
  -4  14   5    0.02    0.18
   3 -14  -5    0.17    0.12
  -3  14   5    0.15    0.17
  -3  14   5    0.19    0.10
   3  14  -5   -0.01    0.11
  -2 -14   5   -0.13    0.09
   2 -14  -5    0.00    0.10
   2  14  -5   -0.08    0.13
  -2  14   5   -0.05    0.11
   2  14  -5   -0.10    0.07
  -2  14   5    0.12    0.09
  -1 -14   5   21.79    0.58
   1 -14  -5   21.52    0.60
   1  14  -5   21.43    0.64
  -1  14   5   21.39    0.61
   0 -14   5    2.70    0.23
   0 -14  -5    2.76    0.22
   0 -14   5    2.66    0.17
   0  14  -5    2.96    0.24
   0  14   5    2.49    0.22
   1 -14   5    2.04    0.21
  -1 -14  -5    1.99    0.21
  -1  14  -5    2.22    0.22
   1  14   5    2.14    0.21
  -1  14  -5    1.94    0.20
   2 -14   5    3.61    0.25
   2  14   5    3.60    0.26
  -2  14  -5    3.64    0.28
   3 -14   5    0.07    0.11
  -3  14  -5    0.16    0.18
   3  14   5   -0.06    0.11
   4 -14   5    0.26    0.13
  -4  14  -5    0.23    0.22
   4  14   5    0.05    0.13
   4 -15  -5    0.05    0.11
  -4  15   5    0.14    0.12
   4  15  -5   -0.01    0.13
  -4  15   5    0.13    0.18
   3 -15  -5    6.50    0.31
  -3  15   5    5.51    0.37
  -3  15   5    5.74    0.27
   3  15  -5    6.01    0.34
   2 -15  -5    3.52    0.25
  -2 -15   5    2.65    0.22
  -2  15   5    3.63    0.20
   2  15  -5    3.34    0.29
   2  15  -5    2.84    0.16
  -2  15   5    3.65    0.26
   1 -15  -5   26.08    0.69
  -1 -15   5   26.07    0.67
   1  15  -5   24.52    0.72
  -1  15   5   26.95    0.71
   0 -15  -5    7.57    0.32
   0 -15   5    6.91    0.31
   0  15   5    7.37    0.35
   0  15  -5    7.11    0.36
   1 -15   5    0.57    0.14
  -1 -15  -5    0.65    0.13
   1  15   5    0.61    0.14
  -1  15  -5    0.65    0.15
  -1  15  -5    0.89    0.16
   2 -15   5    7.97    0.35
  -2  15  -5    8.28    0.37
   2  15   5    8.05    0.37
   3 -15   5    0.76    0.15
  -3  15  -5    0.85    0.21
   3  15   5    0.50    0.15
   4 -15   5   -0.14    0.12
   4  15   5    0.01    0.13
  -4  15  -5    0.08    0.21
   4 -16  -5    0.20    0.13
  -4  16   5    0.24    0.18
   4  16  -5    0.13    0.14
  -4  16   5    0.18    0.13
   3 -16  -5    3.75    0.27
  -3  16   5    4.90    0.36
   3  16  -5    4.03    0.29
  -3  16   5    3.97    0.24
   2 -16  -5    9.17    0.37
  -2  16   5    8.87    0.31
   2  16  -5    8.59    0.25
   2  16  -5    8.87    0.42
  -2  16   5    9.50    0.37
  -1 -16   5   83.06    1.68
   1 -16  -5   80.90    1.71
  -1  16   5   84.58    1.74
   1  16  -5   82.36    1.77
   0 -16   5    2.48    0.26
   0 -16  -5    2.85    0.24
   0  16   5    3.23    0.28
   0  16  -5    2.62    0.27
   1 -16   5    0.08    0.11
  -1 -16  -5    0.20    0.11
   1  16   5    0.30    0.14
  -1  16  -5    0.21    0.15
  -1  16  -5    0.19    0.13
   2 -16   5    9.22    0.38
  -2  16  -5    9.35    0.40
   2  16   5   10.12    0.42
   3 -16   5    3.99    0.28
   3  16   5    3.56    0.28
  -3  16  -5    3.73    0.32
   4 -16   5    0.16    0.14
  -4  16  -5    0.26    0.23
   4  16   5    0.43    0.16
   4 -17  -5   -0.09    0.11
  -4  17   5   -0.02    0.12
  -4  17   5    0.21    0.19
   4  17  -5   -0.08    0.13
   3 -17  -5    4.93    0.30
  -3  17   5    4.48    0.37
  -3  17   5    5.11    0.26
   3  17  -5    4.94    0.32
   2 -17  -5    0.26    0.12
  -2  17   5    0.16    0.11
  -2  17   5    0.15    0.13
   2  17  -5   -0.08    0.14
   2  17  -5   -0.03    0.07
   1 -17  -5    1.20    0.19
  -1 -17   5    1.13    0.18
  -1 -17   5    0.99    0.18
   1  17  -5    0.62    0.18
  -1  17   5    1.20    0.19
   0 -17   5    1.70    0.21
   0 -17  -5    2.45    0.25
   0  17  -5    1.86    0.24
   0  17   5    2.07    0.23
   1 -17   5    9.43    0.39
  -1 -17  -5    9.26    0.36
  -1  17  -5    9.96    0.42
   1  17   5    8.57    0.39
  -1  17  -5    9.16    0.38
   2 -17   5    2.04    0.21
   2  17   5    1.91    0.22
  -2  17  -5    2.11    0.23
   3 -17   5    0.51    0.15
   3  17   5    0.52    0.16
  -3  17  -5    0.87    0.22
   4 -17   5    0.05    0.13
  -4  17  -5   -0.10    0.21
   4  17   5    0.20    0.15
   4 -18  -5    4.99    0.31
  -4  18   5    5.54    0.41
  -4  18   5    5.18    0.29
   4  18  -5    5.40    0.35
   3 -18  -5    0.34    0.14
  -3  18   5    0.26    0.13
  -3  18   5    0.42    0.23
   3  18  -5    0.19    0.15
   2 -18  -5    0.20    0.13
  -2  18   5    0.64    0.13
   2  18  -5    0.50    0.17
  -1 -18   5   45.34    1.03
   1 -18  -5   43.82    1.06
  -1 -18   5   43.96    1.03
   1  18  -5   44.44    1.11
  -1  18   5   46.70    1.09
   0 -18   5   50.69    1.16
   0 -18  -5   50.73    1.16
   0  18  -5   51.96    1.23
   0  18   5   51.45    1.21
   1 -18   5    5.30    0.33
  -1 -18  -5    5.71    0.32
   1  18   5    5.32    0.33
  -1  18  -5    5.46    0.34
  -1  18  -5    6.26    0.34
   2 -18   5    1.60    0.20
  -2  18  -5    1.62    0.22
   2  18   5    1.51    0.21
   3 -18   5    0.04    0.13
  -3  18  -5    0.21    0.19
   3  18   5    0.16    0.14
   4 -18   5   -0.18    0.13
  -4  18  -5    0.08    0.23
   4  18   5   -0.12    0.13
   4 -19  -5    1.34    0.20
  -4  19   5    1.17    0.28
   4  19  -5    1.26    0.21
  -4  19   5    1.43    0.20
   3 -19  -5    6.66    0.35
   3  19  -5    7.01    0.38
  -3  19   5    6.41    0.43
  -3  19   5    6.76    0.30
   2 -19  -5    1.50    0.20
  -2  19   5    1.72    0.17
   2  19  -5    1.53    0.21
  -1 -19   5   62.44    1.33
   1 -19  -5   59.22    1.37
  -1 -19   5   61.38    1.34
  -1  19   5   63.52    1.41
   1  19  -5   62.65    1.44
   0 -19  -5    7.97    0.39
   0 -19   5    7.41    0.37
   0  19   5    7.16    0.40
   0  19  -5    7.51    0.44
   1 -19   5   24.87    0.70
  -1 -19  -5   25.63    0.69
   1  19   5   24.21    0.74
  -1  19  -5   25.13    0.68
  -1  19  -5   25.42    0.74
   2 -19   5    0.67    0.16
   2  19   5    0.67    0.17
  -2  19  -5    0.82    0.19
   3 -19   5   -0.16    0.12
  -3  19  -5    0.06    0.20
   3  19   5   -0.11    0.13
   4 -20  -5    0.79    0.18
   4  20  -5    0.90    0.21
  -4  20   5    0.78    0.26
   3 -20  -5    1.07    0.19
  -3  20   5    1.43    0.18
   3  20  -5    1.42    0.22
  -3  20   5    1.15    0.26
   2 -20  -5    0.06    0.13
  -2  20   5    0.01    0.11
   2  20  -5    0.17    0.14
  -1 -20   5    4.33    0.30
   1 -20  -5    4.04    0.31
   1  20  -5    3.99    0.35
  -1  20   5    4.03    0.34
   0 -20   5   -0.26    0.16
   0 -20  -5   -0.15    0.15
   0  20  -5   -0.01    0.17
   0  20   5   -0.15    0.15
  -1 -20  -5    3.83    0.31
   1 -20   5    3.22    0.30
  -1  20  -5    3.85    0.32
  -1  20  -5    4.37    0.33
   1  20   5    3.93    0.35
   2 -20   5    0.03    0.13
   2  20   5   -0.06    0.14
  -2  20  -5    0.03    0.17
   3 -20   5    0.45    0.17
   3  20   5    0.43    0.17
  -3  20  -5    0.60    0.22
   4 -21  -5    3.86    0.31
   4  21  -5    4.00    0.35
  -4  21   5    4.59    0.41
   3 -21  -5    0.85    0.18
  -3  21   5    0.63    0.14
  -3  21   5    0.36    0.22
   3  21  -5    0.61    0.18
   2 -21  -5    1.29    0.19
   2  21  -5    1.16    0.21
  -2  21   5    1.08    0.15
   1 -21  -5    0.04    0.13
  -1 -21   5   -0.03    0.12
  -1  21   5   -0.05    0.15
   1  21  -5   -0.07    0.14
   0 -21  -5   -0.13    0.15
   0 -21   5    0.04    0.13
   0 -21   5   -0.16    0.14
   0  21  -5    0.23    0.18
   0  21   5    0.26    0.19
   1 -21   5    2.40    0.26
  -1  21  -5    2.68    0.27
   1  21   5    2.14    0.27
  -1  21  -5    2.18    0.25
   2 -21   5    0.18    0.15
  -2  21  -5   -0.03    0.17
   2  21   5   -0.04    0.13
   3 -21   5   -0.17    0.14
  -3  21  -5   -0.05    0.21
   3  21   5    0.07    0.16
   3 -22  -5    0.29    0.15
  -3  22   5    0.20    0.12
  -3  22   5    0.04    0.21
   3  22  -5    0.10    0.16
   2 -22  -5    0.77    0.17
   2  22  -5    0.55    0.19
  -2  22   5    0.37    0.13
  -1 -22   5    0.88    0.17
   1 -22  -5    0.60    0.17
   1  22  -5    0.79    0.20
  -1  22   5    0.73    0.19
   0 -22   5    4.70    0.31
   0 -22  -5    4.89    0.33
   0 -22   5    5.64    0.34
   0  22  -5    5.58    0.38
   0  22   5    4.48    0.38
   1 -22   5    0.09    0.16
   1  22   5   -0.25    0.17
  -1  22  -5    0.17    0.17
   2 -22   5    0.81    0.19
  -2  22  -5    0.77    0.22
   2  22   5    0.60    0.19
   3 -22   5    0.42    0.17
  -3  22  -5    0.14    0.23
   3  22   5    0.11    0.17
   3 -23  -5    0.61    0.17
  -3  23   5    0.79    0.15
  -3  23   5    0.57    0.26
   3  23  -5    0.73    0.20
   2 -23  -5    1.15    0.20
  -2  23   5    1.32    0.16
   2  23  -5    1.76    0.25
  -1 -23   5    0.14    0.13
   1 -23  -5    0.32    0.16
   1  23  -5    0.12    0.17
  -1  23   5    0.14    0.16
   0 -23   5    4.57    0.34
   0 -23   5    4.70    0.32
   0 -23  -5    4.75    0.33
   0  23   5    4.23    0.34
   0  23  -5    4.65    0.37
   1 -23   5    2.01    0.25
   1  23   5    1.91    0.28
   2 -23   5    0.88    0.20
  -2  23  -5    1.24    0.25
   2  23   5    0.62    0.20
   3 -23   5    0.95    0.21
  -3  23  -5    1.40    0.28
   3  23   5    1.09    0.23
   3 -24  -5    0.19    0.17
   3  24  -5    0.15    0.18
  -3  24   5    0.27    0.14
  -3  24   5    0.01    0.25
   2 -24  -5    0.43    0.17
   2  24  -5    0.31    0.19
  -2  24   5    0.15    0.12
   1 -24  -5    0.10    0.15
   1  24  -5    0.04    0.17
  -1  24   5    0.14    0.15
   0 -24   5   -0.29    0.15
   0 -24   5    0.01    0.14
   0 -24  -5   -0.04    0.14
   0  24   5   -0.12    0.17
   0  24  -5   -0.09    0.16
   1 -24   5    1.67    0.23
   1 -24   5    1.99    0.25
   1  24   5    1.99    0.28
   2 -24   5    0.48    0.18
   2  24   5    0.43    0.20
  -2  24  -5    0.69    0.23
   3 -25  -5   -0.18    0.15
  -3  25   5   -0.04    0.13
  -3  25   5   -0.19    0.24
   3  25  -5    0.14    0.18
   2 -25  -5    4.17    0.33
   2  25  -5    4.91    0.40
  -2  25   5    4.45    0.27
   1 -25  -5    0.94    0.20
   1  25  -5    0.93    0.24
  -1  25   5    1.30    0.23
   0 -25   5    0.30    0.16
   0 -25  -5    0.16    0.16
   0  25  -5    0.02    0.19
   0  25   5    0.38    0.20
   1 -25   5    0.37    0.20
   1 -25   5    0.48    0.19
   1  25   5    0.23    0.20
   2 -25   5    5.95    0.39
   2 -25   5    6.05    0.38
  -2  25  -5    6.16    0.44
   2  25   5    5.67    0.41
   2 -26  -5    1.67    0.25
  -2  26   5    1.64    0.19
   2  26  -5    1.85    0.28
   1 -26  -5    0.70    0.19
  -1  26   5    0.69    0.21
   1  26  -5    0.60    0.22
   0 -26   5    1.38    0.22
   0 -26  -5    1.45    0.23
   0  26   5    1.79    0.27
   0  26  -5    1.61    0.27
   1 -26   5    2.48    0.28
   1 -26   5    2.94    0.31
   1  26   5    2.59    0.31
   2 -26   5    1.79    0.27
   2 -26   5    2.39    0.28
   2  26   5    2.18    0.30
   2 -27  -5    0.41    0.20
   2  27  -5    0.64    0.23
  -2  27   5    0.43    0.15
   1 -27  -5    0.37    0.18
   1  27  -5    0.30    0.22
   0 -27  -5    1.26    0.22
   0 -27   5    1.36    0.23
   0  27  -5    1.21    0.25
   0  27   5    1.25    0.24
   1 -27   5    0.61    0.20
   1  27   5    0.70    0.23
   1 -28  -5    2.16    0.27
   1  28  -5    1.75    0.30
   0 -28   5    0.05    0.17
   0  28  -5   -0.03    0.18
   0  28   5    0.04    0.20
   1 -28   5    1.62    0.25
   1  28   5    1.38    0.28
   1 -29  -5    0.01    0.19
   1  29  -5    0.13    0.23
   0 -29   5   -0.03    0.17
   0  29   5    0.10    0.21
   0  29  -5   -0.11    0.20
  -5   0   6   -0.09    0.18
   5   0  -6    0.24    0.12
  -4   0   6    6.66    0.37
   4   0  -6    7.12    0.31
  -3   0   6    0.07    0.15
   3   0  -6   -0.14    0.12
  -3   0   6    0.11    0.12
   2   0  -6    4.12    0.24
  -2   0   6    4.35    0.23
  -2   0   6    4.42    0.20
  -2   0   6    4.15    0.21
  -1   0   6    2.60    0.14
  -1   0   6    2.53    0.18
  -1   0   6    2.66    0.14
   1   0  -6    2.63    0.18
   0   0   6    6.97    0.29
   0   0  -6    6.86    0.29
  -1   0  -6    2.02    0.19
   1   0   6    1.77    0.18
  -2   0  -6    2.08    0.17
   2   0   6    2.43    0.23
   2   0   6    2.20    0.20
   3   0   6    0.18    0.17
   4   0   6   -0.38    0.13
   4   0   6    0.49    0.23
  -5  -1   6   -0.18    0.18
   5  -1  -6    0.17    0.11
  -5   1   6    0.17    0.19
   5   1  -6    0.22    0.12
  -4  -1   6    1.24    0.21
   4  -1  -6    1.28    0.16
   4   1  -6    1.14    0.16
  -4   1   6    1.62    0.23
  -3  -1   6   16.74    0.53
  -3  -1   6   17.70    0.46
   3  -1  -6   15.90    0.49
  -3   1   6   16.68    0.45
   3   1  -6   16.13    0.50
  -3   1   6   16.38    0.53
  -2  -1   6   12.22    0.33
  -2  -1   6   11.99    0.37
   2  -1  -6   12.08    0.39
  -2  -1   6   12.61    0.36
   2   1  -6   12.39    0.40
  -2   1   6   12.44    0.38
  -2   1   6   12.05    0.36
  -2   1   6   12.65    0.34
  -1  -1   6    0.18    0.07
   1  -1  -6    0.28    0.09
  -1  -1   6    0.21    0.06
  -1  -1   6    0.27    0.09
   1   1  -6    0.29    0.10
  -1   1   6    0.17    0.08
  -1   1   6    0.22    0.07
  -1   1   6    0.23    0.08
   0  -1   6    1.47    0.15
   0  -1  -6    1.63    0.16
   0   1   6    1.81    0.17
   0   1  -6    1.55    0.16
   1  -1   6    0.17    0.07
   1  -1   6    0.32    0.13
   1  -1   6    0.05    0.08
  -1  -1  -6    0.03    0.09
  -1   1  -6   -0.03    0.09
   1   1   6    0.06    0.08
  -2  -1  -6    6.98    0.25
   2  -1   6    8.20    0.32
   2  -1   6    6.63    0.33
   2   1   6    6.84    0.31
   2   1   6    7.25    0.35
  -2   1  -6    7.14    0.25
   3  -1   6   63.03    1.55
   3  -1   6   68.41    1.41
   3   1   6   66.58    1.57
   3   1   6   67.79    1.42
   4  -1   6   12.99    0.56
   4  -1   6   13.06    0.46
   4   1   6   12.90    0.47
   4   1   6   12.57    0.54
  -5  -2   6   -0.30    0.18
   5  -2  -6    0.12    0.11
  -5   2   6    0.06    0.17
   5   2  -6    0.17    0.11
  -4  -2   6    1.44    0.23
   4  -2  -6    2.20    0.20
  -4   2   6    1.55    0.22
   4   2  -6    1.41    0.17
   3  -2  -6   56.27    1.21
  -3  -2   6   55.00    1.22
  -3   2   6   56.71    1.08
  -3   2   6   57.26    1.26
   3   2  -6   56.83    1.22
  -2  -2   6   39.86    0.77
  -2  -2   6   41.69    0.86
   2  -2  -6   41.34    0.93
  -2  -2   6   41.02    0.87
   2   2  -6   41.65    0.93
  -2   2   6   41.58    0.87
  -2   2   6   39.64    0.89
  -2   2   6   40.23    0.78
  -1  -2   6    1.85    0.12
  -1  -2   6    1.63    0.17
   1  -2  -6    1.88    0.18
  -1  -2   6    1.75    0.10
  -1   2   6    1.89    0.16
   1   2  -6    1.82    0.18
  -1   2   6    2.02    0.17
   0  -2   6   -0.31    0.09
   0  -2  -6   -0.10    0.09
   0   2   6   -0.05    0.08
  -1  -2  -6    1.45    0.15
   1  -2   6    1.64    0.13
   1  -2   6    1.45    0.17
   1  -2   6    1.26    0.15
   1   2   6    1.60    0.17
  -1   2  -6    1.31    0.15
   2  -2   6    0.05    0.15
   2  -2   6    0.03    0.10
  -2   2  -6   -0.02    0.08
   2   2   6   -0.10    0.10
   2   2   6    0.31    0.16
   3  -2   6   22.17    0.71
   3  -2   6   21.21    0.60
   3   2   6   20.67    0.63
   3   2   6   21.38    0.69
   4  -2   6    9.35    0.39
   4  -2   6    8.83    0.48
   4   2   6    8.89    0.40
   4   2   6    9.21    0.48
  -5  -3   6    0.06    0.20
   5  -3  -6    0.06    0.11
   5   3  -6    0.16    0.12
  -5   3   6    0.06    0.17
   4  -3  -6    0.69    0.13
  -4  -3   6    0.46    0.18
   4   3  -6    0.42    0.13
  -4   3   6    0.55    0.18
   3  -3  -6    7.94    0.36
  -3  -3   6    8.63    0.38
   3   3  -6    8.24    0.35
  -3   3   6    8.81    0.42
  -3   3   6    8.28    0.33
  -2  -3   6    1.30    0.13
  -2  -3   6    1.41    0.13
  -2  -3   6    1.35    0.13
   2  -3  -6    1.21    0.15
  -2   3   6    1.17    0.16
  -2   3   6    1.34    0.13
  -2   3   6    1.30    0.13
   2   3  -6    1.26    0.15
  -1  -3   6    1.57    0.15
   1  -3  -6    1.69    0.16
  -1  -3   6    1.62    0.11
  -1  -3   6    1.58    0.10
   1   3  -6    1.60    0.16
   1   3  -6    1.79    0.13
  -1   3   6    1.88    0.16
  -1   3   6    1.55    0.15
   0  -3   6   14.24    0.44
   0  -3  -6   15.14    0.45
   0   3   6   15.25    0.45
   0   3  -6   13.73    0.44
   1  -3   6    1.64    0.12
  -1  -3  -6    1.60    0.16
   1  -3   6    1.50    0.16
   1  -3   6    2.06    0.19
  -1   3  -6    1.64    0.17
   1   3   6    1.46    0.16
   2  -3   6   22.85    0.66
   2  -3   6   22.62    0.60
   2   3   6   22.05    0.66
   2   3   6   23.36    0.62
   3  -3   6   10.10    0.45
   3  -3   6   10.93    0.40
   3   3   6    8.77    0.40
   3   3   6   10.41    0.45
   4  -3   6    7.23    0.42
   4  -3   6    8.25    0.36
   4   3   6    7.24    0.41
   4   3   6    6.75    0.37
  -5  -4   6   -0.16    0.19
   5  -4  -6    0.03    0.11
   5   4  -6    0.03    0.11
  -5   4   6   -0.08    0.16
  -4  -4   6    1.39    0.22
   4  -4  -6    1.61    0.17
   4   4  -6    1.31    0.17
  -4   4   6    1.22    0.20
   3  -4  -6    6.62    0.32
  -3  -4   6    6.84    0.36
  -3   4   6    7.36    0.37
   3   4  -6    7.62    0.34
  -3   4   6    7.51    0.32
   2  -4  -6    0.17    0.10
  -2  -4   6    0.31    0.09
  -2  -4   6    0.21    0.10
  -2  -4   6    0.41    0.10
   2   4  -6    0.35    0.11
  -2   4   6    0.05    0.09
  -2   4   6    0.27    0.09
  -2   4   6    0.49    0.14
  -1  -4   6    3.96    0.21
   1  -4  -6    3.86    0.22
  -1  -4   6    3.93    0.15
  -1   4   6    3.89    0.23
   1   4  -6    3.90    0.17
   1   4  -6    3.71    0.23
   0  -4  -6  172.44    3.22
   0  -4   6  169.80    3.21
   0   4   6  173.33    3.23
   0   4  -6  166.90    3.22
  -1  -4  -6   69.95    1.37
   1  -4   6   63.82    1.37
   1  -4   6   65.61    1.25
   1  -4   6   65.51    1.45
  -1   4  -6   68.61    1.38
   1   4   6   66.34    1.40
   2  -4   6    7.86    0.32
   2  -4   6    7.89    0.37
   2   4   6    7.96    0.34
   3  -4   6    1.11    0.16
   3  -4   6    0.99    0.22
   3   4   6    1.13    0.22
   4  -4   6    0.80    0.24
   4  -4   6    0.78    0.15
   4   4   6    1.11    0.25
   5  -5  -6   -0.02    0.10
   5   5  -6    0.13    0.11
  -5   5   6   -0.13    0.17
  -4  -5   6    0.22    0.18
   4  -5  -6    0.34    0.12
  -4   5   6    0.44    0.19
   4   5  -6    0.28    0.12
  -4   5   6    0.27    0.12
   3  -5  -6   37.53    0.90
  -3  -5   6   38.64    0.91
  -3   5   6   37.57    0.80
   3   5  -6   38.68    0.91
  -3   5   6   39.55    0.96
  -2  -5   6   22.99    0.50
   2  -5  -6   22.70    0.61
  -2  -5   6   23.71    0.55
  -2   5   6   24.29    0.57
  -2   5   6   22.44    0.62
  -2   5   6   22.79    0.52
   2   5  -6   23.37    0.61
   2   5  -6   23.50    0.52
   1  -5  -6   28.12    0.69
  -1  -5   6   28.62    0.67
  -1  -5   6   28.20    0.53
  -1   5   6   28.23    0.68
   1   5  -6   28.40    0.63
   1   5  -6   27.69    0.70
   0  -5  -6   41.50    0.93
   0  -5   6   41.37    0.93
   0   5  -6   42.08    0.95
   0   5   6   41.77    0.95
  -1  -5  -6   20.94    0.55
   1  -5   6   20.70    0.57
   1  -5   6   21.41    0.58
   1   5   6   21.08    0.58
  -1   5  -6   20.89    0.56
   2  -5   6    7.93    0.37
   2  -5   6    8.48    0.33
   2   5   6    7.98    0.34
   3  -5   6    2.73    0.26
   3  -5   6    3.00    0.23
   3   5   6    2.05    0.23
   3   5   6    2.66    0.26
   4  -5   6    2.15    0.31
   4  -5   6    2.16    0.21
   4   5   6    1.19    0.20
   4   5   6    2.08    0.28
   5  -6  -6    0.68    0.14
  -5   6   6    0.66    0.22
   5   6  -6    0.63    0.15
   4  -6  -6    0.34    0.12
  -4   6   6    0.23    0.16
  -4   6   6    0.32    0.14
   4   6  -6    0.35    0.13
   3  -6  -6   18.80    0.54
  -3   6   6   18.40    0.59
  -3   6   6   18.99    0.50
   3   6  -6   19.19    0.55
   2  -6  -6    0.01    0.10
  -2  -6   6    0.05    0.08
  -2  -6   6    0.19    0.09
  -2   6   6    0.13    0.09
  -2   6   6   -0.03    0.09
  -2   6   6    0.12    0.13
   2   6  -6    0.13    0.11
   2   6  -6    0.14    0.06
  -1  -6   6   -0.01    0.08
   1  -6  -6   -0.04    0.09
  -1  -6   6    0.08    0.06
   1   6  -6    0.04    0.09
  -1   6   6   -0.02    0.09
   1   6  -6    0.03    0.06
   0  -6  -6   11.63    0.40
   0  -6   6   11.93    0.41
   0   6  -6   12.21    0.41
   0   6   6   12.13    0.43
   1  -6   6    2.36    0.21
   1  -6   6    2.67    0.22
  -1  -6  -6    2.35    0.21
   1   6   6    2.48    0.21
  -1   6  -6    2.94    0.22
   2  -6   6    0.12    0.10
   2  -6   6    0.17    0.14
   2   6   6   -0.05    0.10
   3  -6   6    0.19    0.11
   3  -6   6    0.07    0.15
  -3   6  -6    0.35    0.18
   3   6   6    0.04    0.12
   4  -6   6    0.89    0.23
   4  -6   6    0.73    0.15
   4   6   6    0.93    0.23
   4   6   6    0.29    0.16
   5  -7  -6    0.45    0.14
   5   7  -6    0.42    0.14
  -5   7   6    0.41    0.20
   4  -7  -6    4.76    0.27
  -4   7   6    4.50    0.33
  -4   7   6    4.62    0.28
   4   7  -6    4.58    0.27
   3  -7  -6   -0.16    0.10
  -3   7   6    0.02    0.11
   3   7  -6   -0.07    0.10
  -3   7   6   -0.14    0.13
  -2  -7   6    1.89    0.17
   2  -7  -6    1.58    0.17
  -2   7   6    1.81    0.20
   2   7  -6    1.67    0.09
   2   7  -6    1.66    0.17
  -2   7   6    1.52    0.14
  -2   7   6    1.74    0.16
  -1  -7   6   16.88    0.47
  -1  -7   6   16.65    0.35
   1  -7  -6   16.91    0.49
  -1   7   6   16.56    0.49
   1   7  -6   17.18    0.50
   0  -7   6    5.46    0.29
   0  -7   6    6.06    0.26
   0  -7  -6    5.27    0.29
   0  -7   6    5.74    0.17
   0   7  -6    5.24    0.31
   0   7   6    5.33    0.31
   1  -7   6    1.84    0.18
  -1  -7  -6    1.92    0.18
   1  -7   6    1.93    0.21
   1   7   6    1.76    0.19
  -1   7  -6    2.26    0.22
   2  -7   6    0.27    0.11
   2  -7   6    0.03    0.15
   2   7   6    0.07    0.11
  -2   7  -6    0.03    0.14
   3  -7   6    0.05    0.15
   3  -7   6   -0.06    0.09
  -3   7  -6    0.02    0.17
   3   7   6   -0.09    0.10
   4  -7   6    1.76    0.28
   4  -7   6    1.40    0.18
   4   7   6    1.02    0.24
   4   7   6    1.31    0.19
  -4   7  -6    1.19    0.27
   5  -8  -6    0.65    0.15
   5   8  -6    0.49    0.15
  -5   8   6    0.72    0.22
   4  -8  -6    1.18    0.17
  -4   8   6    1.15    0.17
  -4   8   6    1.07    0.21
   4   8  -6    1.10    0.17
   3  -8  -6    0.41    0.12
  -3   8   6    0.38    0.12
   3   8  -6    0.51    0.12
  -3   8   6    0.50    0.17
  -2  -8   6    1.65    0.17
   2  -8  -6    1.49    0.16
  -2   8   6    1.64    0.21
   2   8  -6    1.64    0.18
  -2   8   6    1.61    0.16
  -2   8   6    1.41    0.14
  -1  -8   6   16.01    0.45
  -1  -8   6   15.45    0.33
   1  -8  -6   15.51    0.47
   1   8  -6   15.63    0.49
  -1   8   6   15.16    0.46
   0  -8   6  178.41    3.62
   0  -8  -6  186.15    3.45
   0  -8   6  183.71    2.83
   0  -8   6  184.78    3.44
   0   8  -6  179.76    3.47
   0   8   6  182.53    3.47
   1  -8   6   20.06    0.57
   1  -8   6   20.28    0.56
  -1  -8  -6   21.06    0.55
  -1   8  -6   20.05    0.44
  -1   8  -6   20.83    0.58
   1   8   6   20.35    0.58
   2  -8   6    8.89    0.39
   2  -8   6    9.09    0.35
   2   8   6    9.11    0.37
  -2   8  -6    9.02    0.34
   3  -8   6    0.04    0.11
   3  -8   6    0.08    0.15
   3   8   6    0.06    0.12
  -3   8  -6    0.02    0.17
   4  -8   6    2.32    0.30
   4  -8   6    2.39    0.23
   4   8   6    2.35    0.24
  -4   8  -6    1.92    0.30
   5  -9  -6    0.13    0.13
   5   9  -6    0.33    0.14
  -5   9   6    0.62    0.23
   4  -9  -6    7.27    0.34
  -4   9   6    7.57    0.43
  -4   9   6    7.08    0.32
   4   9  -6    7.31    0.35
   3  -9  -6    3.24    0.23
   3   9  -6    3.22    0.24
  -3   9   6    3.81    0.31
  -3   9   6    2.97    0.21
  -2  -9   6   12.71    0.36
   2  -9  -6   11.99    0.41
  -2   9   6   12.05    0.46
  -2   9   6   12.67    0.39
  -2   9   6   11.73    0.35
   2   9  -6   11.87    0.43
  -1  -9   6    0.17    0.10
   1  -9  -6    0.07    0.09
   1   9  -6    0.26    0.12
  -1   9   6   -0.01    0.10
   1   9  -6    0.25    0.07
   0  -9   6    1.06    0.15
   0  -9  -6    0.97    0.15
   0  -9   6    1.19    0.09
   0  -9   6    0.93    0.14
   0   9  -6    1.03    0.16
   0   9   6    0.75    0.15
   1  -9   6   19.05    0.55
   1  -9   6   18.94    0.55
  -1  -9  -6   19.92    0.54
   1   9   6   19.90    0.58
  -1   9  -6   19.40    0.55
  -1   9  -6   19.39    0.43
   2  -9   6    9.12    0.36
   2  -9   6    8.91    0.39
   2   9   6    9.62    0.39
  -2   9  -6    9.53    0.35
   3  -9   6    0.18    0.17
   3  -9   6   -0.06    0.11
  -3   9  -6   -0.29    0.16
   3   9   6    0.10    0.12
   4  -9   6    0.66    0.15
   4  -9   6    0.50    0.23
  -4   9  -6    0.20    0.24
   4   9   6    0.57    0.16
   5 -10  -6   -0.03    0.12
  -5  10   6    0.23    0.21
   5  10  -6   -0.03    0.13
   4 -10  -6    0.80    0.15
   4  10  -6    0.48    0.15
  -4  10   6    0.81    0.15
  -4  10   6    0.72    0.20
   3 -10  -6    0.16    0.12
  -3  10   6    0.61    0.18
   3  10  -6    0.34    0.13
  -3  10   6    0.42    0.13
   2 -10  -6    0.36    0.13
  -2 -10   6    0.92    0.13
  -2  10   6    0.64    0.13
   2  10  -6    0.68    0.15
  -2  10   6    0.66    0.18
  -2  10   6    0.70    0.12
  -1 -10   6   27.04    0.66
   1 -10  -6   26.93    0.69
   1  10  -6   27.18    0.54
   1  10  -6   26.40    0.71
  -1  10   6   26.10    0.68
   0 -10  -6    1.93    0.19
   0 -10   6    2.71    0.20
   0 -10   6    2.32    0.18
   0 -10   6    2.64    0.09
   0  10  -6    2.66    0.24
   0  10   6    2.28    0.22
   1 -10   6    0.56    0.15
  -1 -10  -6    0.63    0.13
   1 -10   6    0.41    0.12
   1  10   6    0.50    0.15
  -1  10  -6    0.62    0.13
  -1  10  -6    0.76    0.10
   2 -10   6    0.51    0.13
   2 -10   6    0.68    0.17
  -2  10  -6    0.61    0.14
   2  10   6    0.63    0.14
   3 -10   6    0.26    0.12
   3 -10   6    0.51    0.18
   3  10   6    0.30    0.13
  -3  10  -6    0.08    0.18
   4 -10   6    0.83    0.24
   4 -10   6    1.00    0.17
   4  10   6    0.73    0.18
  -4  10  -6    0.91    0.26
   5 -11  -6    1.52    0.20
   5  11  -6    1.47    0.21
  -5  11   6    1.48    0.28
   4 -11  -6    0.57    0.14
  -4  11   6    0.51    0.15
  -4  11   6    0.87    0.20
   4  11  -6    0.45    0.14
   3 -11  -6    3.62    0.25
   3  11  -6    3.41    0.26
  -3  11   6    3.42    0.22
  -3  11   6    3.59    0.32
  -2 -11   6    5.24    0.26
   2 -11  -6    4.80    0.28
  -2  11   6    4.81    0.27
   2  11  -6    5.07    0.30
   2  11  -6    5.10    0.19
  -2  11   6    5.21    0.23
  -1 -11   6    0.35    0.12
   1 -11  -6    0.73    0.14
   1  11  -6    0.48    0.15
   1  11  -6    0.75    0.09
  -1  11   6    0.70    0.15
   0 -11   6    2.40    0.22
   0 -11  -6    2.14    0.20
   0 -11   6    2.45    0.17
   0  11   6    2.32    0.24
   0  11  -6    2.22    0.21
   1 -11   6    1.56    0.19
  -1 -11  -6    1.28    0.16
   1 -11   6    1.36    0.16
  -1  11  -6    1.53    0.13
  -1  11  -6    1.75    0.19
   1  11   6    1.43    0.18
   2 -11   6    0.01    0.10
   2 -11   6   -0.06    0.14
  -2  11  -6    0.08    0.12
   2  11   6    0.05    0.11
   3 -11   6    7.51    0.35
   3 -11   6    7.74    0.41
  -3  11  -6    7.57    0.39
   3  11   6    7.65    0.36
   4 -11   6    3.42    0.32
   4 -11   6    3.49    0.26
  -4  11  -6    3.20    0.34
   4  11   6    3.48    0.29
   4 -12  -6    0.43    0.14
  -4  12   6    0.62    0.14
  -4  12   6    0.59    0.20
   4  12  -6    0.40    0.15
   3 -12  -6    0.86    0.16
   3  12  -6    0.72    0.16
  -3  12   6    1.07    0.21
  -3  12   6    1.07    0.16
   2 -12  -6    5.76    0.30
  -2 -12   6    6.10    0.28
  -2  12   6    5.84    0.25
   2  12  -6    5.63    0.32
   2  12  -6    5.93    0.20
  -2  12   6    5.82    0.30
   1 -12  -6    2.11    0.22
  -1 -12   6    2.20    0.20
   1  12  -6    1.63    0.21
  -1  12   6    2.05    0.20
   0 -12   6    0.16    0.10
   0 -12  -6    0.08    0.11
   0 -12   6    0.10    0.11
   0  12   6   -0.04    0.10
   0  12  -6    0.06    0.12
   0  12  -6    0.18    0.07
   1 -12   6    0.89    0.15
   1 -12   6    0.95    0.16
  -1 -12  -6    0.81    0.14
  -1  12  -6    1.09    0.12
  -1  12  -6    0.92    0.16
   1  12   6    0.97    0.17
   2 -12   6    0.84    0.18
   2 -12   6    0.57    0.14
   2  12   6    0.69    0.15
  -2  12  -6    0.73    0.15
   3 -12   6    0.99    0.17
   3 -12   6    1.22    0.22
   3  12   6    1.23    0.18
  -3  12  -6    1.10    0.21
   4 -12   6    0.60    0.21
   4 -12   6    0.53    0.15
   4  12   6    0.24    0.15
  -4  12  -6    0.52    0.23
   4 -13  -6    0.27    0.12
  -4  13   6    0.12    0.12
  -4  13   6    0.50    0.19
   4  13  -6    0.17    0.13
   3 -13  -6    1.76    0.20
   3  13  -6    1.68    0.21
  -3  13   6    1.83    0.18
  -3  13   6    1.94    0.26
  -2 -13   6    0.22    0.11
   2 -13  -6    0.28    0.13
  -2 -13   6    0.38    0.12
  -2  13   6    0.41    0.12
   2  13  -6    0.18    0.09
  -2  13   6    0.22    0.12
   2  13  -6    0.37    0.15
  -1 -13   6    1.78    0.19
   1 -13  -6    2.16    0.22
   1  13  -6    1.73    0.22
  -1  13   6    1.85    0.20
   0 -13   6    7.36    0.34
   0 -13  -6    7.17    0.32
   0 -13   6    7.33    0.27
   0  13  -6    6.88    0.34
   0  13  -6    7.12    0.23
   0  13   6    7.44    0.34
   1 -13   6    0.05    0.13
   1 -13   6    0.01    0.11
  -1 -13  -6    0.03    0.11
  -1  13  -6    0.19    0.11
  -1  13  -6   -0.01    0.13
   1  13   6    0.06    0.11
   2 -13   6    2.59    0.23
   2 -13   6    2.60    0.23
   2  13   6    2.85    0.25
  -2  13  -6    2.51    0.23
   3 -13   6    2.97    0.28
   3 -13   6    3.52    0.27
   3  13   6    3.47    0.28
  -3  13  -6    3.05    0.30
   4 -13   6    0.21    0.21
   4 -13   6    0.02    0.13
   4  13   6   -0.07    0.13
  -4  13  -6   -0.10    0.22
   4 -14  -6    1.21    0.18
  -4  14   6    1.46    0.26
  -4  14   6    1.46    0.19
   4  14  -6    1.23    0.20
   3 -14  -6    7.74    0.36
  -3  14   6    7.84    0.32
  -3  14   6    7.60    0.42
   3  14  -6    7.90    0.38
   2 -14  -6    8.32    0.36
  -2  14   6    9.18    0.32
   2  14  -6    8.77    0.25
   2  14  -6    8.35    0.40
  -2  14   6    9.13    0.37
   1 -14  -6   -0.02    0.10
  -1 -14   6   -0.18    0.12
   1  14  -6   -0.23    0.14
  -1  14   6    0.07    0.13
   0 -14   6    0.25    0.11
   0 -14  -6    0.35    0.12
   0 -14   6    0.20    0.13
   0  14   6    0.27    0.13
   0  14  -6    0.05    0.13
   1 -14   6    0.19    0.13
  -1 -14  -6    0.25    0.12
   1 -14   6    0.37    0.14
  -1  14  -6    0.22    0.12
   1  14   6    0.12    0.13
  -1  14  -6    0.03    0.13
   2 -14   6    1.93    0.21
   2 -14   6    2.49    0.25
   2  14   6    2.52    0.25
  -2  14  -6    2.73    0.26
   3 -14   6    6.27    0.38
   3 -14   6    6.56    0.34
  -3  14  -6    7.62    0.39
   3  14   6    6.92    0.36
   4 -14   6    0.11    0.14
   4 -14   6    0.21    0.22
  -4  14  -6    0.43    0.23
   4  14   6    0.11    0.14
   4 -15  -6    1.01    0.18
   4  15  -6    1.30    0.20
  -4  15   6    1.61    0.20
  -4  15   6    1.34    0.26
   3 -15  -6    0.02    0.12
  -3  15   6    0.04    0.11
  -3  15   6    0.01    0.18
   3  15  -6    0.03    0.13
   2 -15  -6   21.27    0.64
   2  15  -6   22.66    0.68
  -2  15   6   20.76    0.53
  -2  15   6   22.54    0.62
  -1 -15   6    1.02    0.17
   1 -15  -6    1.34    0.18
   1  15  -6    0.85    0.19
  -1  15   6    1.15    0.18
   0 -15   6    1.45    0.16
   0 -15  -6    1.40    0.18
   0 -15   6    0.90    0.18
   0  15  -6    1.04    0.19
   0  15   6    1.55    0.20
   1 -15   6   -0.01    0.13
  -1 -15  -6    0.12    0.12
   1 -15   6    0.27    0.14
   1  15   6    0.05    0.13
  -1  15  -6    0.16    0.14
  -1  15  -6    0.13    0.12
   2 -15   6    1.31    0.21
   2 -15   6    1.27    0.18
  -2  15  -6    1.54    0.19
   2  15   6    1.20    0.19
   3 -15   6    6.28    0.34
   3 -15   6    6.27    0.38
   3  15   6    6.51    0.37
  -3  15  -6    6.72    0.39
   4 -15   6   -0.05    0.13
   4 -15   6    0.21    0.21
   4  15   6    0.06    0.14
  -4  15  -6   -0.05    0.22
   4 -16  -6    0.18    0.14
  -4  16   6    0.29    0.14
   4  16  -6    0.05    0.14
  -4  16   6    0.12    0.18
   3 -16  -6    1.64    0.20
  -3  16   6    1.49    0.27
  -3  16   6    1.80    0.18
   3  16  -6    1.54    0.22
   2 -16  -6    1.54    0.20
   2  16  -6    1.38    0.21
  -2  16   6    1.34    0.16
   1 -16  -6    6.77    0.34
  -1 -16   6    6.44    0.35
  -1  16   6    7.33    0.38
   1  16  -6    7.04    0.41
   0 -16   6   39.85    0.97
   0 -16  -6   41.01    0.97
   0 -16   6   40.95    0.91
   0  16  -6   38.93    1.01
   0  16   6   40.41    1.01
   1 -16   6    2.60    0.27
  -1 -16  -6    2.92    0.25
   1 -16   6    3.20    0.24
  -1  16  -6    3.11    0.25
   1  16   6    2.95    0.29
  -1  16  -6    2.44    0.25
   2 -16   6    0.27    0.13
   2 -16   6    0.26    0.17
   2  16   6    0.29    0.15
  -2  16  -6    0.30    0.16
   3 -16   6    0.12    0.14
   3 -16   6    0.37    0.21
  -3  16  -6    0.34    0.20
   3  16   6    0.33    0.16
   4 -16   6    0.25    0.15
   4 -16   6    0.28    0.23
  -4  16  -6   -0.17    0.22
   4  16   6    0.10    0.15
   4 -17  -6    0.64    0.16
   4  17  -6    0.78    0.19
  -4  17   6    0.76    0.23
   3 -17  -6    0.67    0.16
   3  17  -6    0.58    0.18
  -3  17   6    0.61    0.14
  -3  17   6    0.37    0.20
   2 -17  -6    5.37    0.32
   2  17  -6    5.59    0.36
  -2  17   6    5.33    0.27
  -1 -17   6   74.93    1.55
   1 -17  -6   72.99    1.58
   1  17  -6   72.91    1.64
  -1  17   6   71.94    1.59
   0 -17   6   33.31    0.87
   0 -17   6   33.99    0.79
   0 -17  -6   33.71    0.86
   0  17  -6   33.39    0.92
   0  17   6   33.44    0.90
   1 -17   6   55.63    1.29
   1 -17   6   59.38    1.33
  -1 -17  -6   58.20    1.26
   1  17   6   57.80    1.34
  -1  17  -6   57.27    1.32
  -1  17  -6   56.68    1.20
   2 -17   6    4.71    0.31
  -2  17  -6    4.68    0.33
   2  17   6    4.56    0.33
   3 -17   6    0.73    0.22
   3 -17   6    0.52    0.16
   3  17   6    0.52    0.17
  -3  17  -6    0.82    0.22
   4 -18  -6    1.21    0.19
   4  18  -6    1.07    0.21
  -4  18   6    1.01    0.27
   3 -18  -6    1.31    0.19
   3  18  -6    1.62    0.23
  -3  18   6    1.52    0.18
  -3  18   6    1.65    0.28
   2 -18  -6    0.75    0.16
   2  18  -6    1.01    0.20
  -2  18   6    0.68    0.15
   1 -18  -6    4.45    0.32
  -1 -18   6    3.67    0.28
  -1  18   6    4.15    0.33
   1  18  -6    4.03    0.36
   0 -18   6    6.59    0.29
   0 -18   6    6.57    0.38
   0 -18  -6    7.11    0.37
   0  18  -6    6.31    0.39
   0  18   6    7.15    0.42
   1 -18   6    4.71    0.35
   1 -18   6    5.02    0.32
  -1  18  -6    5.30    0.33
   1  18   6    4.71    0.34
  -1  18  -6    5.22    0.36
   2 -18   6    0.90    0.18
  -2  18  -6    0.90    0.20
   2  18   6    0.96    0.20
   3 -18   6    1.64    0.22
  -3  18  -6    1.80    0.26
   3  18   6    1.45    0.22
   4 -19  -6    0.85    0.18
  -4  19   6    0.83    0.25
   4  19  -6    0.70    0.20
   3 -19  -6    0.10    0.14
  -3  19   6    0.06    0.12
   3  19  -6    0.01    0.14
  -3  19   6    0.10    0.19
   2 -19  -6    2.94    0.27
   2  19  -6    2.80    0.30
  -2  19   6    3.08    0.23
   1 -19  -6    0.11    0.15
  -1 -19   6    0.01    0.14
  -1 -19   6    0.19    0.14
   1  19  -6    0.03    0.17
  -1  19   6    0.28    0.15
   0 -19   6    1.07    0.21
   0 -19  -6    1.22    0.21
   0 -19   6    1.24    0.17
   0  19  -6    1.23    0.24
   0  19   6    1.03    0.21
   1 -19   6    0.77    0.20
  -1  19  -6    0.63    0.19
   1  19   6    0.48    0.20
  -1  19  -6    0.62    0.18
   2 -19   6    0.13    0.15
  -2  19  -6    0.26    0.18
   2  19   6    0.03    0.16
   3 -19   6   -0.08    0.14
   3  19   6   -0.01    0.15
   3 -20  -6    1.37    0.20
  -3  20   6    1.68    0.20
   3  20  -6    1.48    0.23
  -3  20   6    1.16    0.28
   2 -20  -6    1.75    0.22
   2  20  -6    1.82    0.25
  -2  20   6    1.57    0.18
   1 -20  -6    0.06    0.14
  -1 -20   6    0.03    0.14
  -1 -20   6    0.31    0.14
   1  20  -6    0.09    0.15
  -1  20   6    0.14    0.15
   0 -20   6   51.20    1.14
   0 -20  -6   50.45    1.20
   0 -20   6   51.04    1.20
   0  20  -6   53.54    1.28
   0  20   6   51.10    1.26
   1 -20   6   29.10    0.81
  -1  20  -6   30.26    0.86
   1  20   6   30.18    0.88
   2 -20   6   -0.03    0.15
   2  20   6   -0.06    0.16
   3 -20   6    0.42    0.17
   3  20   6    0.28    0.17
   3 -21  -6    1.36    0.22
  -3  21   6    1.37    0.29
   3  21  -6    1.47    0.23
  -3  21   6    1.48    0.19
   2 -21  -6    0.70    0.17
  -2  21   6    0.81    0.15
   2  21  -6    0.72    0.20
   1 -21  -6   -0.08    0.14
  -1 -21   6   -0.07    0.12
  -1 -21   6   -0.17    0.13
   1  21  -6    0.08    0.16
  -1  21   6    0.00    0.15
   0 -21  -6    2.07    0.25
   0 -21   6    1.90    0.25
   0  21   6    1.87    0.27
   0  21  -6    2.18    0.28
   1 -21   6   19.49    0.64
   1  21   6   18.13    0.66
   2 -21   6    1.17    0.21
   2  21   6    1.10    0.23
   3 -21   6   -0.04    0.15
   3  21   6    0.05    0.17
   3 -22  -6    1.41    0.22
   3  22  -6    1.86    0.27
  -3  22   6    1.74    0.32
  -3  22   6    1.97    0.22
   2 -22  -6    0.29    0.17
   2  22  -6    0.28    0.18
  -2  22   6    0.04    0.12
  -1 -22   6   -0.09    0.13
  -1 -22   6   -0.05    0.15
   1 -22  -6   -0.05    0.14
   1  22  -6   -0.10    0.17
  -1  22   6    0.02    0.15
   0 -22   6    0.66    0.19
   0 -22  -6    0.53    0.18
   0  22  -6    0.61    0.21
   0  22   6    0.48    0.20
   1 -22   6    0.93    0.21
   1  22   6    0.98    0.24
   2 -22   6    0.45    0.18
   2  22   6    0.39    0.20
   3 -23  -6    0.46    0.18
  -3  23   6    0.36    0.25
   3  23  -6    0.53    0.21
   2 -23  -6    0.13    0.16
  -2  23   6    0.14    0.12
   2  23  -6    0.13    0.18
   1 -23  -6   -0.10    0.14
  -1  23   6   -0.07    0.16
   1  23  -6   -0.05    0.16
   0 -23   6    0.98    0.20
   0 -23  -6    1.01    0.20
   0 -23   6    0.62    0.17
   0  23   6    0.73    0.20
   0  23  -6    0.61    0.22
   1 -23   6    0.00    0.17
   1  23   6   -0.01    0.17
   2 -23   6   -0.11    0.16
   2  23   6   -0.16    0.17
   2 -24  -6    2.12    0.26
   2  24  -6    1.90    0.29
  -2  24   6    1.99    0.21
   1 -24  -6    0.20    0.17
   1  24  -6    0.11    0.18
  -1  24   6    0.37    0.19
   0 -24  -6    3.27    0.31
   0 -24   6    3.55    0.33
   0 -24   6    3.41    0.32
   0  24  -6    3.35    0.34
   0  24   6    3.51    0.37
   1 -24   6    0.36    0.18
   1  24   6    0.50    0.22
   2 -24   6    1.17    0.23
   2  24   6    1.23    0.25
   2 -25  -6   -0.16    0.16
  -2  25   6   -0.04    0.13
   2  25  -6    0.04    0.20
   1 -25  -6    0.49    0.19
   1  25  -6    0.58    0.22
  -1  25   6    0.67    0.22
   0 -25   6    0.39    0.18
   0 -25   6    0.42    0.19
   0 -25  -6    0.48    0.19
   0  25  -6    0.33    0.21
   0  25   6    0.15    0.18
   1 -25   6   -0.05    0.17
   1 -25   6    0.03    0.16
   1  25   6   -0.20    0.18
   2 -25   6   -0.14    0.18
   2  25   6    0.03    0.19
   2 -26  -6    1.47    0.25
   2  26  -6    1.43    0.29
   1 -26  -6    0.05    0.17
   1  26  -6   -0.04    0.18
   0 -26   6    0.18    0.17
   0 -26   6    0.15    0.16
   0  26   6    0.18    0.19
   0  26  -6   -0.09    0.20
   1 -26   6   -0.19    0.16
   1 -26   6   -0.22    0.18
   1  26   6   -0.35    0.18
   1 -27  -6    6.55    0.42
   1  27  -6    6.30    0.45
   0 -27   6    0.07    0.17
   0  27  -6    0.03    0.20
   0  27   6    0.11    0.20
   1 -27   6    0.11    0.17
   1 -27   6   -0.07    0.19
   1  27   6   -0.07    0.20
   0 -28   6   -0.02    0.17
   0  28   6   -0.10    0.19
   5   0  -7    0.12    0.13
  -5   0   7   -0.16    0.19
  -4   0   7   -0.15    0.14
   4   0  -7    0.03    0.11
   3   0  -7   -0.07    0.11
  -3   0   7   -0.16    0.10
  -3   0   7   -0.34    0.12
  -2   0   7   -0.30    0.11
  -2   0   7   -0.08    0.11
   2   0  -7   -0.31    0.12
  -2   0   7    0.01    0.10
  -1   0   7   -0.08    0.09
  -1   0   7    0.07    0.06
  -1   0   7    0.00    0.08
   1   0  -7   -0.05    0.09
   0   0  -7   -0.27    0.09
   0   0   7   -0.09    0.11
  -1   0  -7   -0.19    0.11
   1   0   7   -0.11    0.10
   2   0   7    0.08    0.15
   2   0   7   -0.20    0.10
   3   0   7    0.03    0.16
   3   0   7   -0.01    0.12
   4   0   7   -0.19    0.17
   4   0   7    0.46    0.25
   5  -1  -7    0.26    0.14
  -5  -1   7    0.06    0.21
   5   1  -7    0.14    0.13
  -5   1   7    0.26    0.21
   4  -1  -7    0.28    0.14
  -4  -1   7    0.11    0.16
  -4   1   7    0.32    0.17
   4   1  -7    0.20    0.12
  -3  -1   7   10.56    0.40
   3  -1  -7   10.68    0.41
  -3  -1   7   11.03    0.36
  -3   1   7   10.46    0.41
   3   1  -7   10.55    0.41
  -3   1   7   10.94    0.37
  -2  -1   7   38.74    0.85
  -2  -1   7   38.28    0.82
   2  -1  -7   37.46    0.91
  -2  -1   7   37.09    0.75
  -2   1   7   37.56    0.75
  -2   1   7   38.68    0.85
   2   1  -7   37.91    0.92
  -2   1   7   38.31    0.85
   1  -1  -7    0.51    0.12
  -1  -1   7    0.63    0.10
  -1  -1   7    0.34    0.11
  -1  -1   7    0.61    0.07
  -1   1   7    0.63    0.10
  -1   1   7    0.49    0.12
  -1   1   7    0.60    0.09
   1   1  -7    0.60    0.13
   0  -1  -7   19.56    0.56
   0  -1   7   19.33    0.55
   0   1  -7   19.53    0.55
   0   1   7   19.25    0.55
  -1  -1  -7    7.95    0.34
   1  -1   7    7.74    0.25
   1  -1   7    7.68    0.34
  -1   1  -7    8.19    0.35
   1   1   7    7.73    0.35
   2  -1   7    3.01    0.24
   2  -1   7    3.57    0.28
   2   1   7    3.06    0.26
   2   1   7    2.94    0.24
   3  -1   7    0.11    0.17
   3  -1   7    0.13    0.13
   3   1   7    0.02    0.18
   3   1   7   -0.07    0.12
   4  -1   7    9.01    0.49
   4  -1   7    7.91    0.40
   4   1   7    8.98    0.49
   4   1   7    7.93    0.41
   5  -2  -7    3.73    0.28
  -5  -2   7    3.69    0.37
  -5   2   7    3.65    0.36
   5   2  -7    4.13    0.29
  -4  -2   7    6.36    0.36
   4  -2  -7    6.36    0.32
  -4   2   7    6.57    0.37
   4   2  -7    6.26    0.33
  -3  -2   7    5.71    0.31
  -3  -2   7    5.90    0.27
   3  -2  -7    5.66    0.31
  -3   2   7    5.66    0.27
  -3   2   7    5.12    0.32
   3   2  -7    5.70    0.31
  -2  -2   7    4.20    0.23
  -2  -2   7    4.01    0.22
   2  -2  -7    3.59    0.28
  -2  -2   7    4.27    0.26
   2   2  -7    3.94    0.29
  -2   2   7    3.79    0.27
  -2   2   7    4.05    0.26
  -2   2   7    4.30    0.23
   1  -2  -7    3.11    0.23
  -1  -2   7    2.88    0.22
  -1  -2   7    3.35    0.17
  -1  -2   7    3.09    0.12
   1   2  -7    3.36    0.24
  -1   2   7    3.11    0.19
  -1   2   7    3.39    0.23
   0  -2  -7    3.95    0.25
   0  -2   7    4.38    0.27
   0   2  -7    3.66    0.25
   0   2   7    3.91    0.25
   1  -2   7    0.02    0.07
   1  -2   7   -0.02    0.11
  -1  -2  -7   -0.10    0.10
   1   2   7   -0.12    0.11
  -1   2  -7   -0.16    0.11
   2  -2   7    4.33    0.30
   2  -2   7    4.25    0.27
   2   2   7    4.16    0.27
   3  -2   7    3.14    0.25
   3  -2   7    3.20    0.31
   3   2   7    3.26    0.27
   3   2   7    3.54    0.30
   4  -2   7    8.03    0.41
   4  -2   7    9.57    0.50
   4   2   7    7.07    0.41
   4   2   7    9.17    0.50
  -5  -3   7   -0.33    0.20
   5  -3  -7    0.09    0.14
   5   3  -7    0.13    0.14
  -5   3   7    0.02    0.18
  -4  -3   7   -0.04    0.16
   4  -3  -7   -0.01    0.12
  -4   3   7    0.07    0.16
   4   3  -7    0.29    0.13
   3  -3  -7   10.86    0.41
  -3  -3   7   10.21    0.40
  -3  -3   7   10.96    0.36
   3   3  -7   10.21    0.41
  -3   3   7   10.88    0.37
  -3   3   7   10.48    0.43
   2  -3  -7   14.60    0.50
  -2  -3   7   14.14    0.39
  -2  -3   7   14.31    0.41
  -2  -3   7   14.69    0.43
  -2   3   7   15.22    0.41
  -2   3   7   14.46    0.46
  -2   3   7   14.08    0.46
   2   3  -7   15.36    0.50
  -1  -3   7    0.02    0.07
   1  -3  -7    0.11    0.10
  -1  -3   7    0.00    0.09
  -1   3   7    0.04    0.09
  -1   3   7    0.18    0.10
   1   3  -7    0.04    0.11
   0  -3   7    2.86    0.22
   0  -3  -7    2.76    0.24
   0   3  -7    3.03    0.25
   0   3   7    2.69    0.22
  -1  -3  -7    8.53    0.34
   1  -3   7    8.62    0.24
   1  -3   7    8.26    0.36
   1  -3   7    8.74    0.36
   1   3   7    8.95    0.37
  -1   3  -7    8.38    0.37
   2  -3   7    6.09    0.31
   2  -3   7    5.74    0.32
   2   3   7    5.34    0.30
   3  -3   7    0.56    0.20
   3  -3   7    0.34    0.13
   3   3   7    0.25    0.15
   3   3   7    0.51    0.21
   4  -3   7   17.46    0.68
   4  -3   7   16.99    0.57
   4   3   7   16.34    0.58
   4   3   7   16.06    0.65
   5  -4  -7    0.17    0.14
  -5  -4   7   -0.05    0.22
  -5   4   7    0.36    0.21
   5   4  -7    0.43    0.15
  -4  -4   7    1.23    0.22
   4  -4  -7    1.44    0.19
  -4   4   7    1.49    0.18
  -4   4   7    1.51    0.23
   4   4  -7    1.45    0.19
  -3  -4   7   17.69    0.52
   3  -4  -7   16.81    0.53
   3   4  -7   17.12    0.54
  -3   4   7   17.02    0.47
  -3   4   7   17.30    0.56
  -2  -4   7   70.10    1.26
  -2  -4   7   72.85    1.41
   2  -4  -7   73.52    1.54
  -2  -4   7   74.64    1.46
  -2   4   7   73.02    1.49
   2   4  -7   70.96    1.53
  -2   4   7   71.64    1.47
  -2   4   7   70.73    1.28
   1  -4  -7    2.66    0.23
  -1  -4   7    2.95    0.16
  -1  -4   7    2.31    0.22
   1   4  -7    2.69    0.22
  -1   4   7    2.70    0.22
   0  -4  -7    0.46    0.13
   0  -4   7    0.67    0.14
   0   4   7    0.44    0.13
   0   4  -7    0.59    0.14
   1  -4   7    2.12    0.23
   1  -4   7    1.07    0.17
  -1  -4  -7    1.50    0.17
  -1   4  -7    1.28    0.18
   1   4   7    1.29    0.17
   2  -4   7    0.08    0.11
   2  -4   7    0.06    0.15
   2   4   7   -0.01    0.12
   3  -4   7    3.90    0.27
   3  -4   7    3.94    0.32
   3   4   7    3.33    0.27
   3   4   7    2.91    0.28
   4  -4   7   12.32    0.47
   4  -4   7   13.23    0.57
   4   4   7   12.07    0.55
   4   4   7   11.34    0.50
   5  -5  -7    0.26    0.15
  -5   5   7    0.48    0.22
   5   5  -7    0.23    0.14
  -4  -5   7   -0.40    0.14
   4  -5  -7   -0.07    0.11
  -4   5   7    0.09    0.11
  -4   5   7   -0.02    0.15
   4   5  -7   -0.05    0.11
  -3  -5   7    3.48    0.27
   3  -5  -7    3.46    0.25
  -3   5   7    3.39    0.28
  -3   5   7    3.44    0.22
   3   5  -7    3.54    0.26
   2  -5  -7   45.92    1.08
  -2  -5   7   49.59    1.02
  -2  -5   7   46.96    0.88
  -2   5   7   44.83    0.90
   2   5  -7   47.04    1.00
   2   5  -7   48.32    1.10
  -2   5   7   46.89    1.06
  -2   5   7   48.03    1.03
   1  -5  -7    7.45    0.32
  -1  -5   7    7.68    0.33
  -1  -5   7    7.48    0.22
   1   5  -7    7.46    0.35
  -1   5   7    7.90    0.34
   0  -5   7    1.16    0.15
   0  -5  -7    1.29    0.17
   0   5  -7    1.28    0.17
   0   5   7    0.99    0.15
  -1  -5  -7    2.48    0.26
   1  -5   7    2.60    0.25
   1  -5   7    1.82    0.20
   1   5   7    3.05    0.27
  -1   5  -7    3.28    0.27
   2  -5   7    0.82    0.18
   2  -5   7    0.53    0.13
   2   5   7    0.35    0.13
   3  -5   7    0.47    0.20
   3  -5   7    0.41    0.13
   3   5   7    0.36    0.15
   4  -5   7    0.39    0.16
   4  -5   7    0.46    0.25
   4   5   7    0.48    0.24
   5  -6  -7   -0.13    0.13
  -5   6   7   -0.15    0.18
   5   6  -7    0.09    0.13
   4  -6  -7    0.67    0.15
   4   6  -7    0.82    0.16
  -4   6   7    0.72    0.15
  -4   6   7    1.26    0.22
   3  -6  -7    1.42    0.18
  -3   6   7    1.07    0.19
  -3   6   7    1.16    0.16
   3   6  -7    0.97    0.16
  -2  -6   7    0.05    0.10
  -2  -6   7    0.26    0.11
   2  -6  -7   -0.35    0.12
  -2   6   7   -0.18    0.12
   2   6  -7    0.14    0.08
  -2   6   7    0.15    0.15
   2   6  -7    0.05    0.11
  -2   6   7   -0.11    0.10
  -1  -6   7   11.83    0.29
  -1  -6   7   11.71    0.39
   1  -6  -7   12.18    0.43
  -1   6   7   11.29    0.40
   1   6  -7   11.32    0.43
   0  -6  -7   11.16    0.41
   0  -6   7   10.72    0.40
   0   6   7   11.69    0.42
   0   6  -7   11.00    0.42
  -1  -6  -7  127.61    2.45
   1  -6   7  122.76    2.60
   1  -6   7  124.76    2.48
  -1   6  -7  129.81    2.48
   1   6   7  127.28    2.51
   2  -6   7    3.82    0.26
   2  -6   7    4.17    0.29
   2   6   7    3.98    0.27
   3  -6   7    0.31    0.19
   3  -6   7    0.28    0.13
   3   6   7    0.26    0.14
   4  -6   7    0.80    0.17
   4  -6   7    0.63    0.23
   4   6   7   -0.07    0.18
   5  -7  -7   -0.09    0.13
  -5   7   7    0.29    0.21
   5   7  -7    0.03    0.13
   4  -7  -7    0.08    0.11
  -4   7   7    0.24    0.17
  -4   7   7    0.16    0.13
   4   7  -7    0.12    0.13
   3  -7  -7    0.72    0.15
   3   7  -7    0.73    0.15
  -3   7   7    0.84    0.18
  -3   7   7    0.84    0.14
  -2  -7   7    0.78    0.13
  -2  -7   7    0.45    0.11
   2  -7  -7    0.38    0.15
  -2   7   7    0.44    0.12
   2   7  -7    0.61    0.15
  -2   7   7    0.26    0.14
  -2   7   7    0.55    0.16
  -1  -7   7   14.59    0.46
  -1  -7   7   15.00    0.34
   1  -7  -7   14.30    0.48
   1   7  -7   13.72    0.48
  -1   7   7   14.97    0.48
   0  -7   7    0.10    0.07
   0  -7  -7    0.05    0.11
   0  -7   7   -0.03    0.10
   0   7   7    0.06    0.11
   0   7  -7    0.26    0.13
   1  -7   7    1.40    0.18
   1  -7   7    1.51    0.20
  -1  -7  -7    1.30    0.18
   1   7   7    1.62    0.20
  -1   7  -7    1.80    0.19
   2  -7   7    0.89    0.15
   2  -7   7    0.88    0.19
   2   7   7    0.91    0.16
   3  -7   7    0.00    0.11
   3  -7   7    0.14    0.18
   3   7   7    0.00    0.12
   4  -7   7    1.01    0.27
   4  -7   7    0.77    0.17
   4   7   7    0.42    0.19
   4  -8  -7   -0.02    0.11
   4   8  -7    0.09    0.12
  -4   8   7   -0.05    0.11
  -4   8   7   -0.01    0.16
   3  -8  -7    7.10    0.34
  -3   8   7    7.49    0.31
  -3   8   7    7.08    0.38
   3   8  -7    6.78    0.34
  -2  -8   7    0.13    0.11
   2  -8  -7   -0.32    0.11
   2   8  -7    0.00    0.11
  -2   8   7    0.04    0.14
  -2   8   7   -0.15    0.11
  -2   8   7   -0.03    0.10
  -1  -8   7   25.62    0.66
   1  -8  -7   25.95    0.69
  -1  -8   7   24.94    0.49
  -1   8   7   25.49    0.68
   1   8  -7   23.83    0.69
   0  -8   7    4.55    0.16
   0  -8   7    4.12    0.26
   0  -8  -7    4.28    0.27
   0   8  -7    3.97    0.29
   0   8   7    4.45    0.28
   1  -8   7    3.18    0.26
  -1  -8  -7    3.19    0.27
   1  -8   7    3.89    0.27
   1   8   7    2.82    0.28
  -1   8  -7    3.61    0.27
   2  -8   7    0.14    0.12
   2  -8   7    0.16    0.15
   2   8   7    0.19    0.12
   3  -8   7    0.26    0.13
   3  -8   7    0.06    0.16
   3   8   7    0.07    0.13
   4  -8   7    1.50    0.27
   4  -8   7    1.37    0.20
   4   8   7    1.26    0.21
   4  -9  -7    0.04    0.11
   4   9  -7   -0.07    0.12
  -4   9   7   -0.05    0.15
  -4   9   7   -0.13    0.11
   3  -9  -7   11.41    0.43
  -3   9   7   11.03    0.38
  -3   9   7   11.13    0.47
   3   9  -7   10.85    0.44
   2  -9  -7    2.80    0.25
  -2  -9   7    3.65    0.23
  -2   9   7    3.19    0.21
  -2   9   7    3.42    0.29
   2   9  -7    3.14    0.26
  -2   9   7    2.98    0.24
   1  -9  -7    0.04    0.12
  -1  -9   7    0.06    0.11
  -1  -9   7    0.06    0.07
  -1   9   7   -0.03    0.11
   1   9  -7    0.04    0.12
   0  -9  -7    9.41    0.38
   0  -9   7    9.03    0.21
   0  -9   7    8.64    0.37
   0  -9   7    9.49    0.32
   0   9  -7    9.27    0.39
   0   9   7    9.00    0.40
   1  -9   7    1.38    0.19
   1  -9   7    1.15    0.16
  -1  -9  -7    1.06    0.16
  -1   9  -7    1.08    0.17
   1   9   7    1.07    0.18
   2  -9   7    0.04    0.15
   2  -9   7    0.04    0.11
   2   9   7   -0.05    0.11
   3  -9   7    0.70    0.16
   3  -9   7    0.85    0.22
  -3   9  -7    0.50    0.20
   3   9   7    0.87    0.18
   4  -9   7    2.11    0.30
   4  -9   7    1.79    0.21
   4   9   7    1.90    0.24
   4 -10  -7    0.41    0.14
  -4  10   7    0.41    0.19
  -4  10   7    0.39    0.14
   4  10  -7    0.24    0.14
   3 -10  -7    0.49    0.14
   3  10  -7    0.24    0.15
  -3  10   7    0.41    0.18
  -3  10   7    0.39    0.14
  -2 -10   7    1.91    0.18
   2 -10  -7    1.39    0.20
  -2  10   7    2.04    0.23
  -2  10   7    1.99    0.17
  -2  10   7    1.60    0.19
   2  10  -7    2.04    0.22
   1 -10  -7    0.26    0.12
  -1 -10   7    0.59    0.14
   1  10  -7    0.54    0.15
  -1  10   7    0.33    0.14
   0 -10   7    2.77    0.20
   0 -10  -7    2.85    0.25
   0 -10   7    2.74    0.25
   0 -10   7    2.67    0.11
   0  10   7    2.71    0.26
   0  10  -7    2.62    0.27
   1 -10   7    4.47    0.27
   1 -10   7    4.70    0.28
  -1 -10  -7    4.45    0.28
  -1  10  -7    4.84    0.30
   1  10   7    4.50    0.31
   2 -10   7    0.44    0.17
   2 -10   7    0.42    0.14
   2  10   7    0.44    0.15
  -2  10  -7    0.41    0.14
   3 -10   7    0.64    0.20
   3 -10   7    0.27    0.14
   3  10   7    0.39    0.15
  -3  10  -7   -0.04    0.19
   4 -10   7    1.53    0.28
   4 -10   7    1.01    0.19
   4  10   7    1.05    0.20
   4 -11  -7    0.06    0.12
  -4  11   7    0.27    0.17
   4  11  -7    0.12    0.13
  -4  11   7    0.07    0.12
   3 -11  -7    4.52    0.29
   3  11  -7    4.45    0.30
  -3  11   7    4.54    0.25
  -3  11   7    5.05    0.36
   2 -11  -7   10.52    0.42
  -2  11   7   10.51    0.35
   2  11  -7   10.12    0.43
  -2  11   7   10.74    0.45
  -2  11   7   10.72    0.40
  -1 -11   7    1.02    0.17
   1 -11  -7    1.29    0.18
   1  11  -7    0.83    0.17
  -1  11   7    0.93    0.17
   0 -11   7    0.51    0.14
   0 -11  -7    0.84    0.16
   0 -11   7    0.83    0.14
   0 -11   7    0.59    0.06
   0  11  -7    0.20    0.14
   0  11   7    0.43    0.14
  -1 -11  -7    1.42    0.18
   1 -11   7    1.53    0.19
   1 -11   7    1.48    0.18
  -1  11  -7    1.43    0.19
   1  11   7    1.21    0.19
   2 -11   7   -0.08    0.14
   2 -11   7    0.04    0.12
   2  11   7    0.18    0.12
   3 -11   7    0.58    0.21
   3 -11   7    0.42    0.15
   3  11   7    0.52    0.17
   4 -11   7    0.15    0.20
   4 -11   7    0.25    0.15
   4  11   7   -0.22    0.13
   4 -12  -7    0.00    0.12
   4  12  -7   -0.03    0.13
  -4  12   7    0.01    0.17
  -4  12   7    0.11    0.13
   3 -12  -7    4.66    0.29
  -3  12   7    5.02    0.34
  -3  12   7    4.98    0.26
   3  12  -7    4.67    0.32
   2 -12  -7    0.19    0.13
   2  12  -7    0.24    0.15
  -2  12   7    0.17    0.11
  -2  12   7    0.26    0.13
   1 -12  -7    7.95    0.36
  -1 -12   7    7.08    0.35
   1  12  -7    6.64    0.38
  -1  12   7    7.58    0.36
   0 -12   7    0.02    0.10
   0 -12   7   -0.16    0.11
   0 -12  -7    0.09    0.12
   0  12  -7   -0.04    0.12
   0  12   7    0.10    0.13
   1 -12   7    2.28    0.21
  -1 -12  -7    2.07    0.20
   1 -12   7    2.01    0.21
  -1  12  -7    2.34    0.23
   1  12   7    2.21    0.24
   2 -12   7    0.38    0.15
   2 -12   7   -0.03    0.12
   2  12   7    0.23    0.14
   3 -12   7    0.89    0.17
   3 -12   7    1.31    0.25
   3  12   7    1.29    0.21
   4 -12   7    0.38    0.16
   4 -12   7    0.24    0.20
   4  12   7    0.11    0.16
   4 -13  -7   -0.02    0.12
   4  13  -7   -0.15    0.12
  -4  13   7   -0.01    0.13
  -4  13   7    0.08    0.18
   3 -13  -7    0.30    0.14
  -3  13   7    0.33    0.12
  -3  13   7    0.47    0.19
   3  13  -7    0.28    0.15
   2 -13  -7    3.17    0.25
  -2  13   7    3.37    0.21
   2  13  -7    2.68    0.28
  -1 -13   7   -0.07    0.13
   1 -13  -7    0.11    0.13
  -1  13   7   -0.15    0.12
   1  13  -7   -0.10    0.14
   0 -13   7    0.35    0.16
   0 -13   7    0.81    0.14
   0 -13  -7    0.76    0.15
   0  13   7    0.69    0.17
   0  13  -7    0.61    0.18
   1 -13   7   -0.25    0.10
   1 -13   7    0.11    0.13
  -1 -13  -7   -0.12    0.10
   1  13   7   -0.13    0.12
  -1  13  -7   -0.20    0.12
   2 -13   7    0.31    0.17
   2 -13   7    0.20    0.13
   2  13   7    0.18    0.14
   3 -13   7    0.80    0.17
   3 -13   7    1.05    0.24
   3  13   7    0.89    0.19
   4 -14  -7    0.11    0.14
   4  14  -7   -0.06    0.13
  -4  14   7    0.22    0.20
   3 -14  -7    0.18    0.13
  -3  14   7    0.12    0.11
   3  14  -7    0.21    0.15
  -3  14   7    0.39    0.19
   2 -14  -7    0.19    0.14
   2  14  -7   -0.03    0.13
  -2  14   7    0.31    0.13
  -1 -14   7    2.56    0.23
   1 -14  -7    2.89    0.25
  -1  14   7    3.19    0.26
   1  14  -7    2.54    0.28
   0 -14   7    3.17    0.22
   0 -14   7    2.74    0.26
   0 -14  -7    3.50    0.26
   0  14   7    3.85    0.31
   0  14  -7    2.72    0.27
  -1 -14  -7    0.42    0.14
   1 -14   7    0.13    0.15
   1 -14   7    0.76    0.16
  -1  14  -7    0.13    0.16
   1  14   7    0.49    0.16
   2 -14   7    0.81    0.20
   2 -14   7    0.66    0.17
   2  14   7    0.81    0.18
   3 -14   7    0.23    0.14
   3 -14   7    0.48    0.21
   3  14   7    0.19    0.16
   4 -15  -7    0.00    0.13
   4  15  -7   -0.14    0.15
  -4  15   7    0.23    0.21
   3 -15  -7    0.50    0.16
  -3  15   7    0.49    0.21
   3  15  -7    0.67    0.18
  -3  15   7    0.41    0.13
   2 -15  -7    5.84    0.33
   2  15  -7    6.22    0.39
  -2  15   7    5.59    0.27
  -1 -15   7   -0.23    0.13
   1 -15  -7   -0.05    0.13
   1  15  -7   -0.34    0.15
  -1  15   7    0.10    0.14
   0 -15   7   39.98    0.91
   0 -15  -7   41.00    0.98
   0 -15   7   39.50    0.98
   0  15   7   39.48    1.01
   0  15  -7   39.04    1.02
   1 -15   7    0.46    0.15
   1 -15   7   -0.04    0.14
   1  15   7    0.34    0.16
  -1  15  -7   -0.02    0.16
   2 -15   7    7.49    0.38
   2 -15   7    6.90    0.37
   2  15   7    7.41    0.40
   3 -15   7    3.01    0.31
   3 -15   7    2.96    0.27
   3  15   7    3.07    0.29
   4 -16  -7    0.23    0.15
   4  16  -7   -0.02    0.15
  -4  16   7    0.19    0.21
   3 -16  -7    0.39    0.15
   3  16  -7    0.61    0.18
  -3  16   7    0.58    0.15
  -3  16   7    0.46    0.21
   2 -16  -7    7.74    0.38
   2  16  -7    7.46    0.40
  -2  16   7    7.48    0.31
   1 -16  -7   12.66    0.49
  -1 -16   7   12.49    0.47
  -1  16   7   12.88    0.50
   1  16  -7   13.03    0.54
   0 -16  -7    7.90    0.39
   0 -16   7    7.40    0.41
   0 -16   7    7.12    0.31
   0  16  -7    7.12    0.44
   0  16   7    8.85    0.44
   1 -16   7    2.53    0.23
   1 -16   7    1.94    0.24
   1  16   7    1.99    0.25
  -1  16  -7    2.02    0.25
   2 -16   7    3.23    0.29
   2 -16   7    3.06    0.28
   2  16   7    3.37    0.31
   3 -16   7    1.41    0.26
   3 -16   7    1.41    0.21
   3  16   7    1.47    0.22
   4 -17  -7    2.08    0.24
   4  17  -7    1.73    0.25
  -4  17   7    1.89    0.31
   3 -17  -7    1.76    0.22
   3  17  -7    1.89    0.24
  -3  17   7    1.95    0.20
  -3  17   7    1.59    0.28
   2 -17  -7    1.11    0.19
  -2  17   7    1.09    0.17
   2  17  -7    0.97    0.20
   1 -17  -7    9.52    0.41
  -1 -17   7    9.26    0.41
   1  17  -7    9.72    0.47
  -1  17   7    8.72    0.41
   0 -17   7    7.18    0.41
   0 -17   7    6.86    0.31
   0 -17  -7    7.61    0.39
   0  17   7    7.46    0.43
   0  17  -7    7.53    0.46
   1 -17   7    0.74    0.19
   1 -17   7    0.52    0.20
  -1  17  -7    0.52    0.20
   1  17   7    0.94    0.21
   2 -17   7    0.55    0.18
   2 -17   7    0.69    0.20
   2  17   7    0.48    0.18
   3 -17   7    0.29    0.21
   3 -17   7   -0.02    0.14
   3  17   7    0.15    0.17
   3 -18  -7    0.94    0.19
  -3  18   7    0.69    0.22
  -3  18   7    0.61    0.16
   3  18  -7    0.52    0.18
   2 -18  -7    0.23    0.14
   2  18  -7    0.24    0.17
  -2  18   7    0.17    0.13
   1 -18  -7    0.68    0.18
  -1 -18   7    0.70    0.17
   1  18  -7    0.68    0.20
  -1  18   7    0.74    0.19
   0 -18  -7   27.08    0.77
   0 -18   7   26.37    0.68
   0 -18   7   25.97    0.76
   0  18  -7   27.30    0.83
   0  18   7   27.56    0.82
   1 -18   7   31.75    0.88
   1 -18   7   31.51    0.84
   1  18   7   31.96    0.92
   2 -18   7    5.12    0.36
   2 -18   7    4.62    0.34
   2  18   7    4.67    0.37
   3 -18   7    0.02    0.15
   3 -18   7    0.02    0.20
   3  18   7    0.18    0.16
   3 -19  -7    0.20    0.15
   3  19  -7    0.48    0.19
  -3  19   7    0.21    0.14
  -3  19   7    0.34    0.23
   2 -19  -7    0.63    0.18
   2  19  -7    0.97    0.22
  -2  19   7    0.69    0.15
  -1 -19   7    0.45    0.17
   1 -19  -7    0.47    0.17
  -1  19   7    0.33    0.17
   1  19  -7    0.42    0.19
   0 -19   7   36.06    0.94
   0 -19  -7   35.22    0.93
   0  19   7   34.56    0.97
   0  19  -7   36.73    1.01
   1 -19   7    1.15    0.21
   1 -19   7    0.94    0.22
   1  19   7    1.16    0.24
   2 -19   7   12.53    0.52
   2 -19   7   12.59    0.52
   2  19   7   11.44    0.52
   3 -19   7    0.08    0.16
   3 -19   7    0.19    0.21
   3  19   7    0.18    0.17
   3 -20  -7    3.94    0.32
  -3  20   7    3.49    0.38
   3  20  -7    4.17    0.36
   2 -20  -7   -0.01    0.15
   2  20  -7   -0.11    0.15
  -2  20   7   -0.04    0.11
   1 -20  -7    0.09    0.16
  -1 -20   7    0.00    0.15
  -1  20   7    0.08    0.16
   1  20  -7    0.01    0.17
   0 -20  -7    0.46    0.18
   0 -20   7    0.45    0.19
   0  20  -7    0.57    0.22
   0  20   7    0.56    0.22
   1 -20   7    1.37    0.22
   1 -20   7    1.32    0.23
   1  20   7    1.18    0.25
   2 -20   7    4.05    0.34
   2 -20   7    3.96    0.33
   2  20   7    4.17    0.37
   3 -21  -7    5.84    0.38
  -3  21   7    5.48    0.43
   3  21  -7    5.65    0.41
   2 -21  -7    0.61    0.18
  -2  21   7    0.49    0.14
   2  21  -7    0.77    0.22
  -1 -21   7    0.22    0.16
  -1 -21   7    0.46    0.16
   1 -21  -7    0.41    0.17
   1  21  -7    0.58    0.21
  -1  21   7    0.42    0.18
   0 -21   7    0.63    0.20
   0 -21  -7    0.46    0.18
   0  21  -7    0.47    0.21
   0  21   7    0.31    0.21
   1 -21   7    0.56    0.19
   1 -21   7    1.06    0.22
   1  21   7    0.51    0.22
   2 -21   7    0.45    0.18
   2 -21   7    0.65    0.23
   2  21   7    0.65    0.21
   3 -22  -7    0.33    0.17
   3  22  -7    0.55    0.22
  -3  22   7    0.22    0.25
   2 -22  -7   -0.04    0.16
  -2  22   7   -0.15    0.13
   2  22  -7    0.06    0.19
   1 -22  -7   -0.12    0.15
  -1  22   7   -0.01    0.17
   1  22  -7    0.02    0.19
   0 -22   7    0.35    0.17
   0 -22  -7    0.51    0.19
   0  22  -7    0.54    0.22
   0  22   7    0.36    0.21
   1 -22   7    0.28    0.19
   1  22   7    0.44    0.22
   2 -22   7   -0.08    0.20
   2 -22   7    0.18    0.18
   2  22   7   -0.07    0.18
   2 -23  -7    0.08    0.17
   2  23  -7    0.26    0.21
   1 -23  -7    0.40    0.18
   1  23  -7    0.34    0.21
  -1  23   7    0.15    0.18
   0 -23   7    0.23    0.18
   0 -23  -7    0.12    0.17
   0  23   7   -0.06    0.18
   0  23  -7    0.03    0.19
   1 -23   7   -0.04    0.18
   1  23   7   -0.17    0.17
   2 -23   7   -0.24    0.19
   2 -23   7    0.24    0.19
   2  23   7    0.02    0.19
   2 -24  -7    0.32    0.20
   2  24  -7    0.42    0.21
   1 -24  -7    0.76    0.21
   1  24  -7    1.08    0.24
   0 -24   7    0.19    0.19
   0 -24   7    0.06    0.17
   0  24   7    0.05    0.19
   0  24  -7   -0.04    0.17
   1 -24   7   -0.14    0.17
   1  24   7   -0.01    0.20
   1 -25  -7    2.68    0.29
   1  25  -7    2.52    0.33
   0 -25   7    0.64    0.20
   0 -25   7    0.70    0.22
   0  25   7    0.50    0.21
   0  25  -7    0.49    0.23
   1 -25   7    0.44    0.20
   1  25   7    0.21    0.21
   1 -26  -7   -0.05    0.16
   1  26  -7    0.02    0.21
   0 -26   7    1.08    0.24
   0 -26   7    0.92    0.22
   0  26   7    0.77    0.25
   4   0  -8    2.35    0.24
  -4   0   8    2.16    0.25
  -3   0   8   12.51    0.44
  -3   0   8   12.48    0.40
   3   0  -8   12.04    0.47
  -2   0   8   21.16    0.59
   2   0  -8   20.81    0.66
  -2   0   8   20.83    0.55
  -2   0   8   21.34    0.52
  -1   0   8   18.67    0.56
  -1   0   8   18.00    0.44
  -1   0   8   18.45    0.41
   1   0  -8   18.79    0.59
   0   0   8    7.27    0.35
   0   0  -8    6.89    0.33
   1   0   8    7.99    0.38
  -1   0  -8    8.25    0.37
   2   0   8    4.04    0.28
   3   0   8    0.58    0.16
   3   0   8    0.59    0.22
   4   0   8    9.65    0.52
   4   0   8   10.55    0.48
  -4  -1   8    1.24    0.21
   4  -1  -8    1.32    0.20
  -4   1   8    1.46    0.23
   4   1  -8    1.35    0.20
  -3  -1   8    3.96    0.26
  -3  -1   8    3.84    0.24
   3  -1  -8    3.97    0.28
   3   1  -8    3.72    0.28
  -3   1   8    4.16    0.25
  -3   1   8    3.89    0.28
  -2  -1   8   30.83    0.71
  -2  -1   8   31.75    0.78
  -2  -1   8   31.97    0.68
   2  -1  -8   30.36    0.85
   2   1  -8   31.96    0.85
  -2   1   8   31.79    0.68
  -2   1   8   31.64    0.78
  -2   1   8   32.08    0.74
  -1  -1   8    4.03    0.14
   1  -1  -8    3.36    0.28
  -1  -1   8    3.90    0.22
  -1  -1   8    3.65    0.29
  -1   1   8    4.23    0.20
  -1   1   8    4.02    0.20
   1   1  -8    4.08    0.31
  -1   1   8    3.74    0.30
   0  -1   8    0.68    0.15
   0  -1  -8    0.92    0.17
   0   1  -8    0.74    0.16
   0   1   8    0.79    0.15
  -1  -1  -8    4.39    0.29
   1  -1   8    4.22    0.30
   1   1   8    4.59    0.31
  -1   1  -8    4.28    0.30
   2  -1   8    0.38    0.16
   2  -1   8    0.13    0.13
   2   1   8    0.29    0.14
   3  -1   8    0.23    0.14
   3  -1   8    0.26    0.20
   3   1   8   -0.06    0.19
   3   1   8    0.09    0.13
   4  -1   8    7.60    0.41
   4  -1   8    8.58    0.50
   4   1   8    7.07    0.42
   4   1   8    7.74    0.47
  -4  -2   8    0.12    0.18
   4  -2  -8    0.43    0.15
  -4   2   8    0.40    0.14
   4   2  -8    0.16    0.14
  -4   2   8    0.35    0.17
  -3  -2   8    0.77    0.15
   3  -2  -8    0.95    0.18
  -3  -2   8    0.85    0.16
   3   2  -8    0.68    0.16
  -3   2   8    0.79    0.15
  -3   2   8    1.03    0.17
  -2  -2   8   48.51    0.93
  -2  -2   8   50.32    1.08
   2  -2  -8   47.90    1.15
  -2  -2   8   48.34    1.00
   2   2  -8   49.19    1.16
  -2   2   8   49.88    1.05
  -2   2   8   46.48    0.93
  -2   2   8   48.58    1.08
  -1  -2   8   21.30    0.48
   1  -2  -8   20.30    0.62
  -1  -2   8   21.96    0.61
  -1   2   8   20.72    0.61
  -1   2   8   21.53    0.51
   1   2  -8   20.91    0.63
  -1   2   8   20.37    0.49
   0  -2  -8    0.46    0.15
   0  -2   8    0.33    0.14
   0   2  -8    0.43    0.15
   0   2   8    0.30    0.14
   1  -2   8    0.04    0.13
  -1  -2  -8   -0.13    0.14
   1   2   8   -0.08    0.14
  -1   2  -8   -0.25    0.13
   2  -2   8    0.04    0.12
   2  -2   8    0.07    0.16
   2   2   8   -0.10    0.11
   3  -2   8   -0.06    0.12
   3  -2   8    0.04    0.19
   3   2   8   -0.21    0.12
   3   2   8   -0.20    0.18
   4  -2   8    3.68    0.32
   4  -2   8    3.71    0.39
   4   2   8    4.31    0.40
   4   2   8    2.94    0.30
  -4  -3   8    1.27    0.22
   4  -3  -8    1.58    0.21
   4   3  -8    2.00    0.22
  -4   3   8    1.91    0.21
  -4   3   8    1.93    0.24
  -3  -3   8    2.43    0.25
   3  -3  -8    2.55    0.25
  -3  -3   8    2.71    0.21
  -3   3   8    2.59    0.26
  -3   3   8    2.86    0.21
   3   3  -8    2.61    0.25
  -2  -3   8   66.28    1.37
   2  -3  -8   63.81    1.46
  -2  -3   8   65.14    1.29
  -2  -3   8   66.45    1.19
   2   3  -8   65.54    1.46
  -2   3   8   67.84    1.40
  -2   3   8   65.98    1.36
  -2   3   8   64.86    1.21
  -1  -3   8   15.11    0.38
  -1  -3   8   15.97    0.50
   1  -3  -8   14.74    0.52
  -1   3   8   15.26    0.51
   1   3  -8   15.00    0.53
  -1   3   8   15.21    0.42
   0  -3   8    3.50    0.27
   0  -3  -8    3.69    0.29
   0   3  -8    3.81    0.29
   0   3   8    3.74    0.29
  -1  -3  -8   26.47    0.71
   1  -3   8   24.95    0.71
   1   3   8   26.50    0.73
  -1   3  -8   26.27    0.71
   2  -3   8    0.09    0.16
   2  -3   8   -0.02    0.12
   2   3   8   -0.08    0.12
   3  -3   8    0.18    0.14
   3  -3   8    0.46    0.21
   3   3   8    0.16    0.14
   4  -3   8    0.30    0.23
   4  -3   8    0.17    0.16
   4   3   8    0.28    0.24
  -4  -4   8   -0.05    0.16
   4  -4  -8    0.18    0.14
   4   4  -8    0.24    0.14
  -4   4   8    0.18    0.16
  -4   4   8    0.34    0.14
  -3  -4   8    2.43    0.25
   3  -4  -8    2.88    0.26
  -3   4   8    3.14    0.26
  -3   4   8    2.92    0.22
   3   4  -8    2.84    0.26
  -2  -4   8    3.73    0.22
  -2  -4   8    3.69    0.26
   2  -4  -8    2.47    0.28
  -2   4   8    2.93    0.25
  -2   4   8    3.90    0.28
   2   4  -8    4.16    0.32
  -2   4   8    3.95    0.24
   1  -4  -8    2.84    0.26
  -1  -4   8    3.17    0.18
  -1  -4   8    3.37    0.27
   1   4  -8    3.52    0.29
  -1   4   8    2.69    0.24
  -1   4   8    2.67    0.23
   0  -4   8    6.94    0.34
   0  -4  -8    6.66    0.35
   0   4   8    6.41    0.35
   0   4  -8    6.54    0.35
   1  -4   8   12.57    0.47
  -1  -4  -8   12.76    0.46
  -1   4  -8   12.64    0.47
   1   4   8   12.48    0.48
   2  -4   8    3.65    0.29
   2  -4   8    3.42    0.27
   2   4   8    3.51    0.28
   3  -4   8    1.93    0.28
   3  -4   8    1.46    0.20
   3   4   8    1.42    0.21
   4  -4   8    3.91    0.38
   4  -4   8    3.65    0.30
   4   4   8    2.58    0.29
   4  -5  -8    0.44    0.15
   4   5  -8    0.23    0.14
  -4   5   8    0.26    0.16
  -4   5   8    0.19    0.13
   3  -5  -8    0.35    0.15
  -3   5   8    0.51    0.13
   3   5  -8    0.52    0.16
  -3   5   8    0.56    0.16
  -2  -5   8    4.87    0.29
  -2  -5   8    3.69    0.21
   2  -5  -8    3.07    0.29
   2   5  -8    4.73    0.32
  -2   5   8    4.53    0.25
  -2   5   8    3.15    0.29
  -2   5   8    4.33    0.29
   1  -5  -8   -0.07    0.13
  -1  -5   8    0.16    0.09
  -1  -5   8    0.14    0.12
  -1   5   8   -0.16    0.13
   1   5  -8    0.03    0.13
   0  -5  -8    1.37    0.18
   0  -5   8    1.39    0.18
   0   5   8    1.26    0.19
   0   5  -8    1.36    0.19
  -1  -5  -8    0.63    0.17
   1  -5   8    0.72    0.16
   1  -5   8    1.19    0.18
  -1   5  -8    1.04    0.18
   1   5   8    0.53    0.17
   2  -5   8    3.57    0.29
   2  -5   8    3.18    0.27
   2   5   8    3.16    0.28
   3  -5   8    1.17    0.23
   3  -5   8    1.05    0.18
   3   5   8    1.09    0.19
   4  -5   8    1.87    0.23
   4  -5   8    2.28    0.32
   4   5   8    1.32    0.25
   4  -6  -8    0.10    0.13
  -4   6   8    0.34    0.18
  -4   6   8    0.33    0.14
   4   6  -8    0.13    0.14
   3  -6  -8    1.27    0.19
   3   6  -8    1.17    0.19
  -3   6   8    1.39    0.21
  -3   6   8    1.07    0.17
  -2  -6   8   29.35    0.71
  -2  -6   8   28.62    0.60
   2  -6  -8   26.86    0.76
   2   6  -8   26.74    0.76
  -2   6   8   27.49    0.63
  -2   6   8   26.61    0.71
  -2   6   8   27.58    0.72
  -1  -6   8    0.88    0.11
  -1  -6   8    1.04    0.16
   1  -6  -8    0.88    0.18
  -1   6   8    0.78    0.17
   1   6  -8    0.85    0.18
   0  -6  -8    2.53    0.26
   0  -6   8    2.67    0.23
   0   6   8    2.99    0.27
   0   6  -8    2.72    0.27
   1  -6   8    0.15    0.14
  -1  -6  -8   -0.08    0.14
   1  -6   8    0.44    0.16
   1   6   8   -0.08    0.14
  -1   6  -8    0.29    0.14
   2  -6   8    0.79    0.20
   2  -6   8    0.94    0.17
   2   6   8    0.68    0.17
   3  -6   8    1.00    0.18
   3  -6   8    1.15    0.24
   3   6   8    1.04    0.20
   4  -6   8    1.21    0.28
   4  -6   8    0.72    0.17
   4   6   8    0.18    0.19
   4  -7  -8    0.95    0.18
  -4   7   8    1.42    0.23
  -4   7   8    1.09    0.18
   4   7  -8    0.99    0.19
   3  -7  -8    6.47    0.34
   3   7  -8    6.55    0.36
  -3   7   8    6.67    0.31
  -3   7   8    6.61    0.36
   2  -7  -8    0.72    0.17
  -2  -7   8    1.01    0.13
  -2   7   8    1.08    0.15
  -2   7   8    1.04    0.18
  -2   7   8    0.57    0.16
   2   7  -8    1.04    0.19
  -1  -7   8    7.11    0.34
  -1  -7   8    7.42    0.24
   1  -7  -8    7.22    0.37
  -1   7   8    6.98    0.36
   1   7  -8    7.13    0.36
   0  -7   8    0.32    0.14
   0  -7   8    0.49    0.09
   0  -7  -8    0.36    0.14
   0   7  -8    0.29    0.15
   0   7   8    0.25    0.14
  -1  -7  -8   16.57    0.53
   1  -7   8   16.73    0.55
   1  -7   8   16.96    0.54
   1   7   8   16.74    0.56
  -1   7  -8   17.20    0.55
   2  -7   8    3.67    0.30
   2  -7   8    4.01    0.29
   2   7   8    3.89    0.30
   3  -7   8    0.93    0.17
   3  -7   8    0.75    0.23
   3   7   8    0.55    0.17
   4  -8  -8    0.72    0.17
  -4   8   8    0.88    0.17
   4   8  -8    0.48    0.16
  -4   8   8    0.69    0.20
   3  -8  -8    0.23    0.13
   3   8  -8    0.04    0.14
  -3   8   8    0.06    0.11
  -3   8   8    0.21    0.16
   2  -8  -8   -0.11    0.13
  -2   8   8    0.03    0.10
  -2   8   8    0.14    0.15
   2   8  -8    0.06    0.14
  -2   8   8    0.01    0.12
  -1  -8   8    0.03    0.08
  -1  -8   8   -0.16    0.11
   1  -8  -8   -0.19    0.13
   1   8  -8   -0.04    0.13
  -1   8   8   -0.31    0.12
   0  -8   8    2.88    0.26
   0  -8   8    3.22    0.15
   0  -8  -8    2.97    0.25
   0   8   8    3.23    0.26
   0   8  -8    2.85    0.26
   1  -8   8   11.43    0.44
   1  -8   8   12.93    0.45
  -1  -8  -8   12.40    0.46
  -1   8  -8   12.25    0.47
   1   8   8   11.85    0.48
   2  -8   8    5.67    0.34
   2  -8   8    5.22    0.30
   2   8   8    5.41    0.34
   3  -8   8    0.02    0.13
   3  -8   8    0.15    0.19
   3   8   8   -0.03    0.14
   4  -9  -8    0.17    0.14
   4   9  -8   -0.11    0.13
  -4   9   8    0.19    0.17
   3  -9  -8    1.79    0.21
  -3   9   8    1.83    0.19
   3   9  -8    1.67    0.21
  -3   9   8    1.83    0.24
   2  -9  -8    4.94    0.32
   2   9  -8    4.75    0.31
  -2   9   8    5.40    0.27
  -2   9   8    5.15    0.32
  -1  -9   8    0.10    0.08
  -1  -9   8   -0.02    0.12
   1  -9  -8    0.02    0.13
   1   9  -8   -0.06    0.12
  -1   9   8   -0.28    0.12
   0  -9   8   -0.11    0.11
   0  -9   8    0.05    0.07
   0  -9  -8    0.09    0.11
   0   9  -8   -0.01    0.13
   0   9   8    0.03    0.12
   1  -9   8    0.89    0.17
   1  -9   8    0.49    0.15
  -1  -9  -8    0.59    0.15
   1   9   8    0.57    0.17
  -1   9  -8    0.72    0.17
   2  -9   8    1.10    0.18
   2  -9   8    1.70    0.23
   2   9   8    1.09    0.20
   3  -9   8    0.07    0.18
   3  -9   8    0.19    0.14
   3   9   8    0.25    0.16
   4 -10  -8    0.22    0.14
   4  10  -8    0.27    0.16
  -4  10   8    0.20    0.18
   3 -10  -8    0.06    0.13
  -3  10   8    0.33    0.17
  -3  10   8    0.10    0.11
   3  10  -8    0.12    0.14
   2 -10  -8    7.06    0.37
  -2  10   8    7.54    0.38
   2  10  -8    6.00    0.37
  -2  10   8    7.01    0.29
   1 -10  -8    3.16    0.28
  -1 -10   8    3.08    0.26
  -1 -10   8    3.75    0.16
  -1  10   8    2.95    0.29
   1  10  -8    2.92    0.30
   0 -10   8    0.19    0.07
   0 -10  -8    0.12    0.13
   0 -10   8    0.11    0.14
   0  10   8    0.20    0.14
   0  10  -8    0.09    0.15
  -1 -10  -8    1.27    0.18
   1 -10   8    1.56    0.21
   1 -10   8    1.48    0.20
   1  10   8    1.19    0.20
  -1  10  -8    1.53    0.20
   2 -10   8    0.69    0.17
   2 -10   8    0.80    0.20
   2  10   8    0.68    0.18
   3 -10   8    0.55    0.16
   3 -10   8    0.82    0.23
   3  10   8    0.65    0.19
   4 -11  -8    0.93    0.19
   4  11  -8    0.92    0.20
  -4  11   8    1.07    0.24
   3 -11  -8    0.08    0.13
  -3  11   8    0.20    0.13
   3  11  -8    0.07    0.14
  -3  11   8    0.15    0.17
   2 -11  -8   20.42    0.64
   2  11  -8   19.77    0.65
  -2  11   8   20.14    0.64
  -2  11   8   20.26    0.53
   1 -11  -8    0.18    0.14
  -1 -11   8    0.40    0.15
  -1  11   8   -0.03    0.14
   1  11  -8    0.30    0.17
   0 -11  -8    4.34    0.30
   0 -11   8    3.40    0.29
   0  11  -8    3.75    0.32
   0  11   8    4.34    0.30
   1 -11   8   -0.09    0.12
   1 -11   8    0.12    0.14
  -1  11  -8    0.01    0.14
   1  11   8    0.23    0.14
   2 -11   8    0.13    0.17
   2 -11   8    0.19    0.14
   2  11   8    0.08    0.14
   3 -11   8   -0.09    0.19
   3 -11   8    0.03    0.13
   3  11   8   -0.09    0.14
   4 -12  -8    3.02    0.28
   4  12  -8    3.16    0.30
  -4  12   8    3.30    0.34
   3 -12  -8    0.37    0.15
   3  12  -8    0.48    0.16
  -3  12   8    0.37    0.18
  -3  12   8    0.52    0.15
   2 -12  -8    0.26    0.15
  -2  12   8   -0.04    0.11
  -2  12   8    0.15    0.17
   2  12  -8   -0.02    0.16
  -1 -12   8    8.69    0.39
   1 -12  -8    8.16    0.39
  -1  12   8    8.58    0.41
   1  12  -8    8.18    0.41
   0 -12  -8    0.10    0.13
   0 -12   8   -0.26    0.12
   0  12  -8   -0.27    0.14
   0  12   8   -0.08    0.14
   1 -12   8   -0.14    0.14
   1 -12   8   -0.03    0.13
  -1  12  -8   -0.18    0.13
   1  12   8    0.01    0.13
   2 -12   8    1.29    0.23
   2 -12   8    1.00    0.19
   2  12   8    0.86    0.20
   3 -12   8    0.02    0.19
   3 -12   8   -0.11    0.13
   3  12   8   -0.01    0.15
   4 -13  -8    0.12    0.15
   4  13  -8    0.11    0.15
  -4  13   8    0.56    0.21
   3 -13  -8    0.71    0.17
  -3  13   8    0.48    0.15
   3  13  -8    0.32    0.16
  -3  13   8    0.59    0.20
   2 -13  -8    0.44    0.16
   2  13  -8    0.40    0.16
  -2  13   8    0.61    0.20
  -2  13   8    0.43    0.14
   1 -13  -8    2.19    0.24
  -1 -13   8    2.21    0.23
  -1  13   8    2.23    0.24
   1  13  -8    2.35    0.26
   0 -13  -8    3.24    0.28
   0 -13   8    2.60    0.26
   0  13  -8    2.44    0.27
   0  13   8    3.03    0.30
   1 -13   8    0.05    0.15
   1 -13   8   -0.33    0.12
   1  13   8    0.01    0.14
   2 -13   8    0.18    0.17
   2 -13   8    0.09    0.14
   2  13   8   -0.07    0.15
   3 -13   8    0.04    0.19
   3 -13   8   -0.10    0.13
   3  13   8    0.04    0.16
   4 -14  -8    0.31    0.16
   4  14  -8    0.06    0.16
  -4  14   8    0.16    0.19
   3 -14  -8    0.04    0.13
   3  14  -8   -0.05    0.14
  -3  14   8   -0.07    0.12
  -3  14   8   -0.06    0.17
   2 -14  -8   -0.05    0.13
  -2  14   8    0.03    0.11
   2  14  -8    0.04    0.15
  -1 -14   8    0.54    0.16
   1 -14  -8    0.48    0.17
   1  14  -8    0.33    0.17
  -1  14   8    0.65    0.17
   0 -14   8    3.21    0.29
   0 -14   8    2.66    0.24
   0 -14  -8    3.53    0.29
   0  14   8    3.55    0.32
   0  14  -8    3.30    0.31
   1 -14   8    1.81    0.24
   1 -14   8    2.40    0.23
   1  14   8    2.32    0.27
   2 -14   8    0.06    0.15
   2 -14   8    0.30    0.18
   2  14   8    0.13    0.16
   3 -14   8    1.47    0.27
   3 -14   8    1.30    0.21
   3  14   8    1.47    0.24
   3 -15  -8    1.04    0.20
  -3  15   8    1.43    0.24
  -3  15   8    1.19    0.17
   3  15  -8    1.12    0.22
   2 -15  -8    0.98    0.19
   2  15  -8    0.98    0.21
  -2  15   8    0.93    0.15
   1 -15  -8    8.29    0.41
  -1 -15   8    8.82    0.40
  -1  15   8    9.24    0.44
   1  15  -8    8.24    0.43
   0 -15   8   -0.18    0.13
   0 -15  -8    0.22    0.16
   0 -15   8   -0.15    0.17
   0  15   8    0.14    0.17
   0  15  -8   -0.11    0.18
   1 -15   8    0.92    0.21
   1 -15   8    1.05    0.20
   1  15   8    1.00    0.21
   2 -15   8    0.25    0.19
   2 -15   8    0.20    0.17
   2  15   8   -0.01    0.16
   3 -15   8    0.41    0.22
   3 -15   8    0.20    0.16
   3  15   8    0.39    0.18
   3 -16  -8   -0.03    0.14
   3  16  -8   -0.04    0.15
  -3  16   8   -0.14    0.17
  -3  16   8   -0.02    0.12
   2 -16  -8    0.64    0.17
   2  16  -8    0.76    0.20
  -2  16   8    0.57    0.14
   1 -16  -8    1.44    0.22
  -1 -16   8    1.63    0.22
  -1  16   8    1.31    0.23
   1  16  -8    1.69    0.25
   0 -16   8    4.25    0.36
   0 -16  -8    4.97    0.35
   0  16  -8    4.66    0.39
   0  16   8    5.15    0.35
   1 -16   8    8.35    0.44
   1 -16   8    8.63    0.39
   1  16   8    8.16    0.44
   2 -16   8    0.41    0.19
   2 -16   8    0.76    0.22
   2  16   8    0.88    0.21
   3 -16   8    0.31    0.22
   3 -16   8    0.14    0.16
   3  16   8    0.09    0.17
   3 -17  -8   -0.09    0.14
   3  17  -8    0.01    0.16
  -3  17   8    0.27    0.19
   2 -17  -8    0.39    0.17
   2  17  -8    0.44    0.19
  -2  17   8    0.58    0.14
  -1 -17   8    0.98    0.19
   1 -17  -8    0.81    0.20
   1  17  -8    1.19    0.23
  -1  17   8    0.77    0.20
   0 -17   8    8.29    0.43
   0 -17  -8    8.46    0.42
   0  17   8    8.51    0.46
   0  17  -8    7.71    0.47
   1 -17   8    7.72    0.44
   1 -17   8    8.22    0.39
   1  17   8    8.83    0.47
   2 -17   8   12.28    0.52
   2 -17   8   11.93    0.52
   2  17   8   12.65    0.56
   3 -18  -8    1.34    0.22
  -3  18   8    1.13    0.27
   3  18  -8    1.29    0.25
   2 -18  -8    0.04    0.15
  -2  18   8    0.24    0.14
   2  18  -8    0.11    0.17
   1 -18  -8    0.14    0.16
  -1 -18   8    0.02    0.15
   1  18  -8    0.09    0.17
  -1  18   8    0.05    0.15
   0 -18   8    0.06    0.17
   0 -18  -8    0.28    0.17
   0  18  -8    0.16    0.20
   0  18   8    0.17    0.17
   1 -18   8    0.19    0.17
   1 -18   8    0.28    0.19
   1  18   8    0.27    0.20
   2 -18   8   13.24    0.54
   2 -18   8   12.60    0.54
   2  18   8   12.54    0.58
   3 -19  -8    3.41    0.32
   3  19  -8    3.32    0.35
  -3  19   8    3.27    0.37
   2 -19  -8    0.21    0.17
  -2  19   8    0.02    0.12
   2  19  -8    0.00    0.17
   1 -19  -8    0.05    0.16
  -1 -19   8    0.17    0.16
  -1  19   8   -0.09    0.16
   1  19  -8    0.24    0.19
   0 -19   8    3.91    0.35
   0 -19  -8    3.95    0.32
   0  19   8    4.02    0.38
   0  19  -8    4.52    0.40
   1 -19   8   11.76    0.47
   1 -19   8   12.00    0.53
   1  19   8   11.01    0.53
   2 -19   8    2.42    0.29
   2 -19   8    2.20    0.28
   2  19   8    2.04    0.30
   2 -20  -8    0.27    0.17
   2  20  -8    0.04    0.19
   1 -20  -8    1.42    0.23
   1  20  -8    1.27    0.24
  -1  20   8    1.17    0.23
   0 -20   8    2.68    0.28
   0 -20  -8    2.62    0.28
   0  20  -8    2.89    0.33
   0  20   8    2.57    0.31
   1 -20   8   16.75    0.63
   1  20   8   16.00    0.66
   2 -20   8    0.50    0.23
   2 -20   8    0.81    0.22
   2  20   8    0.56    0.23
   2 -21  -8    1.10    0.23
   2  21  -8    0.59    0.21
   1 -21  -8    0.12    0.17
  -1  21   8   -0.01    0.17
   1  21  -8    0.14    0.20
   0 -21   8    0.04    0.17
   0  21   8   -0.19    0.18
   0  21  -8    0.08    0.20
   1 -21   8    0.07    0.18
   1  21   8    0.14    0.22
   2 -22  -8    5.61    0.40
   2  22  -8    5.74    0.45
   1 -22  -8    0.39    0.18
   1  22  -8    0.14    0.21
   0 -22   8    0.34    0.20
   0  22   8    0.21    0.20
   0  22  -8    0.26    0.21
   1 -22   8    2.03    0.28
   1  22   8    1.51    0.29
   1 -23  -8    0.42    0.18
   1  23  -8    0.05    0.22
   0 -23   8    0.23    0.19
   0  23  -8   -0.11    0.19
   0  23   8   -0.05    0.19
   1 -23   8    0.52    0.22
   1  23   8    0.31    0.24
   1 -24  -8    0.18    0.19
   1  24  -8   -0.03    0.21
   0 -24   8   -0.10    0.18
   0  24   8    0.18    0.21
  -4   0   9   -0.19    0.16
   4   0  -9    0.04    0.15
  -3   0   9   -0.04    0.11
  -3   0   9   -0.05    0.13
   3   0  -9    0.14    0.14
  -2   0   9    0.04    0.10
   2   0  -9   -0.24    0.12
  -1   0   9    0.00    0.18
   1   0  -9    0.10    0.19
   0   0   9    0.09    0.14
   0   0  -9    0.06    0.14
   1   0   9   -0.04    0.13
   2   0   9   -0.34    0.13
   3   0   9   -0.05    0.14
   4  -1  -9    0.20    0.17
   4   1  -9    0.34    0.17
  -4   1   9    0.28    0.17
  -3  -1   9    2.01    0.20
   3  -1  -9    2.21    0.24
  -3   1   9    2.33    0.25
   3   1  -9    1.97    0.23
  -3   1   9    2.03    0.20
   2  -1  -9    0.04    0.14
  -2  -1   9    0.06    0.10
   2   1  -9   -0.04    0.12
  -2   1   9   -0.08    0.10
  -2   1   9   -0.13    0.10
   1  -1  -9   66.21    1.51
  -1  -1   9   68.10    1.47
  -1  -1   9   65.85    1.19
   1   1  -9   66.63    1.51
  -1   1   9   67.61    1.48
  -1   1   9   66.49    1.20
   0  -1  -9    0.13    0.14
   0  -1   9    0.19    0.14
   0   1  -9    0.10    0.14
   0   1   9   -0.06    0.13
   1  -1   9    2.05    0.23
   1   1   9    1.58    0.22
   2  -1   9    0.51    0.18
   2   1   9    0.41    0.18
   3  -1   9    0.42    0.17
   3  -1   9    0.52    0.23
   3   1   9    0.44    0.17
   4  -2  -9   10.08    0.47
  -4   2   9   10.52    0.41
  -4   2   9   11.24    0.48
   4   2  -9   10.44    0.47
   3  -2  -9    0.18    0.14
  -3  -2   9    0.07    0.12
  -3   2   9    0.08    0.12
   3   2  -9    0.04    0.13
  -3   2   9    0.04    0.13
   2  -2  -9    0.51    0.17
  -2  -2   9    0.45    0.12
  -2   2   9    0.46    0.12
   2   2  -9    0.24    0.14
  -2   2   9    0.42    0.12
   1  -2  -9   34.08    0.95
  -1  -2   9   36.77    0.73
  -1  -2   9   37.88    0.93
  -1   2   9   36.58    0.94
   1   2  -9   37.47    0.97
  -1   2   9   35.85    0.75
   0  -2   9    2.90    0.28
   0  -2  -9    3.37    0.29
   0   2  -9    2.79    0.26
   0   2   9    2.55    0.26
   1  -2   9    1.13    0.20
   1   2   9    1.69    0.23
   2  -2   9    3.11    0.29
   2   2   9    3.42    0.31
   3  -2   9   -0.09    0.20
   3  -2   9   -0.16    0.13
   3   2   9    0.01    0.16
   4  -3  -9    0.22    0.16
  -4   3   9    0.52    0.17
  -4   3   9    0.15    0.17
   4   3  -9    0.27    0.17
   3  -3  -9   -0.04    0.13
  -3  -3   9    0.11    0.12
  -3   3   9    0.16    0.13
   3   3  -9    0.06    0.14
  -3   3   9    0.00    0.13
  -2  -3   9    0.16    0.11
   2  -3  -9    0.26    0.15
  -2   3   9    0.27    0.12
   2   3  -9    0.29    0.15
  -2   3   9    0.11    0.12
   1  -3  -9    1.98    0.28
  -1  -3   9    3.17    0.31
  -1  -3   9    3.09    0.21
  -1   3   9    3.01    0.23
   1   3  -9    3.31    0.33
  -1   3   9    3.60    0.24
   0  -3   9    0.56    0.16
   0  -3  -9    0.55    0.17
   0   3   9    0.26    0.15
   0   3  -9    0.48    0.16
   1  -3   9    0.74    0.18
   1   3   9    0.77    0.17
   2  -3   9    0.99    0.20
   2   3   9    1.11    0.21
   3  -3   9    2.16    0.30
   3  -3   9    1.66    0.22
   3   3   9    1.71    0.24
   4  -4  -9    0.83    0.20
  -4   4   9    1.22    0.23
   4   4  -9    1.05    0.21
   3  -4  -9    2.68    0.27
  -3  -4   9    3.03    0.22
   3   4  -9    2.55    0.27
  -3   4   9    3.03    0.28
  -3   4   9    2.96    0.23
  -2  -4   9    2.42    0.19
   2  -4  -9    2.69    0.27
   2   4  -9    2.21    0.25
  -2   4   9    2.54    0.20
  -2   4   9    3.03    0.24
  -1  -4   9   22.12    0.65
   1  -4  -9   19.64    0.68
  -1  -4   9   21.83    0.49
  -1   4   9   20.45    0.67
   1   4  -9   22.79    0.70
  -1   4   9   21.10    0.55
   0  -4  -9    0.08    0.14
   0  -4   9    0.08    0.13
   0   4  -9    0.04    0.14
   0   4   9    0.37    0.16
   1  -4   9   -0.13    0.13
   1   4   9   -0.13    0.14
   2  -4   9    1.84    0.24
   2  -4   9    2.03    0.27
   2   4   9    1.82    0.25
   3  -4   9    0.58    0.24
   3  -4   9    0.42    0.16
   3   4   9    0.38    0.17
   4  -5  -9   -0.10    0.15
  -4   5   9   -0.01    0.15
   4   5  -9   -0.03    0.15
   3  -5  -9    0.34    0.15
   3   5  -9    0.20    0.15
  -3   5   9    0.50    0.16
  -3   5   9    0.44    0.15
  -2  -5   9    0.47    0.12
   2  -5  -9    0.57    0.17
  -2   5   9    0.38    0.13
   2   5  -9    0.51    0.16
  -2   5   9    0.61    0.15
  -1  -5   9   26.34    0.72
  -1  -5   9   25.55    0.54
   1  -5  -9   23.43    0.76
   1   5  -9   25.83    0.76
  -1   5   9   25.03    0.63
  -1   5   9   24.98    0.74
   0  -5   9    3.54    0.28
   0  -5  -9    3.87    0.31
   0   5  -9    4.49    0.33
   0   5   9    4.06    0.32
   1  -5   9    0.41    0.15
   1   5   9    0.49    0.16
   2  -5   9   15.16    0.56
   2  -5   9   14.40    0.57
   2   5   9   15.87    0.59
   3  -5   9    0.86    0.23
   3  -5   9    0.93    0.19
   3   5   9    0.79    0.20
   4  -6  -9    0.10    0.15
  -4   6   9    0.22    0.17
   4   6  -9    0.11    0.15
   3  -6  -9   -0.09    0.13
  -3   6   9   -0.07    0.12
   3   6  -9    0.02    0.14
  -3   6   9    0.09    0.14
   2  -6  -9    0.82    0.18
  -2  -6   9    0.65    0.12
  -2   6   9    0.73    0.15
   2   6  -9    0.59    0.17
  -2   6   9    0.71    0.16
   1  -6  -9    0.58    0.22
  -1  -6   9    1.23    0.13
  -1  -6   9    1.11    0.19
  -1   6   9    0.47    0.20
   1   6  -9    1.17    0.21
  -1   6   9    1.06    0.17
   0  -6   9    0.63    0.11
   0  -6  -9    0.72    0.17
   0  -6   9    0.64    0.17
   0   6   9    0.47    0.16
   0   6  -9    0.68    0.18
   1  -6   9    4.32    0.32
   1   6   9    4.72    0.32
   2  -6   9   16.57    0.61
   2  -6   9   16.16    0.59
   2   6   9   17.76    0.62
   3  -6   9    0.67    0.17
   3  -6   9    0.65    0.23
   3   6   9    0.56    0.19
   4  -7  -9   -0.09    0.15
   4   7  -9   -0.04    0.15
  -4   7   9    0.26    0.18
   3  -7  -9    0.20    0.15
   3   7  -9    0.18    0.15
  -3   7   9    0.10    0.13
  -3   7   9    0.16    0.15
  -2  -7   9    1.94    0.17
   2  -7  -9    2.35    0.25
  -2   7   9    2.05    0.22
   2   7  -9    1.97    0.24
  -2   7   9    1.85    0.18
   1  -7  -9   -0.49    0.15
  -1  -7   9    0.29    0.10
  -1  -7   9    0.33    0.15
   1   7  -9    0.23    0.16
  -1   7   9   -0.32    0.15
   0  -7   9    1.79    0.14
   0  -7   9    2.03    0.23
   0  -7  -9    1.81    0.22
   0   7   9    1.58    0.21
   0   7  -9    2.03    0.25
   1  -7   9   -0.13    0.14
   1   7   9    0.02    0.13
   2  -7   9    3.50    0.32
   2  -7   9    3.45    0.29
   2   7   9    4.05    0.34
   3  -7   9    0.00    0.20
   3  -7   9    0.30    0.16
   3   7   9   -0.06    0.16
   4  -8  -9   -0.06    0.14
   4   8  -9    0.01    0.15
  -4   8   9    0.16    0.17
   3  -8  -9    0.08    0.14
  -3   8   9    0.18    0.15
  -3   8   9    0.04    0.12
   3   8  -9    0.19    0.15
  -2  -8   9    0.37    0.11
   2  -8  -9    0.33    0.16
  -2   8   9    0.49    0.14
  -2   8   9    0.33    0.16
   2   8  -9    0.33    0.17
   1  -8  -9   -0.40    0.13
  -1  -8   9    0.12    0.14
  -1  -8   9    0.34    0.10
   1   8  -9    0.04    0.16
  -1   8   9   -0.20    0.15
   0  -8   9    1.25    0.11
   0  -8   9    1.04    0.19
   0  -8  -9    0.84    0.19
   0   8  -9    1.40    0.21
   0   8   9    1.19    0.21
   1  -8   9    0.17    0.15
   1   8   9    0.03    0.15
   2  -8   9    0.21    0.16
   2  -8   9    0.01    0.18
   2   8   9   -0.12    0.16
   3  -8   9    0.43    0.21
   3  -8   9    0.36    0.16
   3   8   9    0.03    0.16
   4  -9  -9   -0.12    0.14
  -4   9   9    0.16    0.18
   4   9  -9   -0.02    0.15
   3  -9  -9    3.17    0.29
  -3   9   9    3.38    0.26
   3   9  -9    3.15    0.30
  -3   9   9    3.35    0.29
   2  -9  -9    3.98    0.32
  -2   9   9    4.00    0.31
   2   9  -9    3.97    0.33
  -2   9   9    3.87    0.24
  -1  -9   9    7.77    0.38
  -1  -9   9    7.44    0.24
   1  -9  -9    7.36    0.41
  -1   9   9    6.91    0.40
   1   9  -9    7.38    0.42
   0  -9  -9    0.81    0.18
   0  -9   9    0.70    0.18
   0   9   9    0.82    0.19
   0   9  -9    0.63    0.19
   1  -9   9    0.66    0.17
   1  -9   9    0.99    0.20
   1   9   9    0.73    0.19
   2  -9   9    3.73    0.31
   2  -9   9    3.35    0.29
   2   9   9    3.26    0.33
   3  -9   9    0.55    0.17
   3  -9   9    0.46    0.21
   3   9   9    0.02    0.16
   4 -10  -9    1.83    0.24
  -4  10   9    1.39    0.25
   4  10  -9    1.43    0.23
   3 -10  -9    0.13    0.15
  -3  10   9    0.27    0.13
   3  10  -9    0.06    0.15
  -3  10   9    0.42    0.18
   2 -10  -9    0.27    0.16
  -2  10   9    0.50    0.18
   2  10  -9    0.49    0.19
  -2  10   9    0.46    0.13
  -1 -10   9    1.97    0.22
   1 -10  -9    1.70    0.23
   1  10  -9    2.01    0.26
  -1  10   9    1.57    0.23
   0 -10   9    0.10    0.15
   0 -10  -9   -0.09    0.14
   0  10   9    0.06    0.14
   0  10  -9   -0.20    0.16
   1 -10   9   -0.14    0.13
   1 -10   9   -0.02    0.15
   1  10   9    0.13    0.16
   2 -10   9   -0.01    0.15
   2 -10   9    0.25    0.19
   2  10   9    0.27    0.17
   3 -10   9   -0.10    0.19
   3 -10   9    0.08    0.15
   3  10   9   -0.09    0.16
   3 -11  -9    0.16    0.14
   3  11  -9    0.17    0.16
  -3  11   9    0.22    0.13
  -3  11   9    0.54    0.19
   2 -11  -9    5.09    0.35
  -2  11   9    4.89    0.36
  -2  11   9    4.64    0.26
   2  11  -9    5.10    0.36
  -1 -11   9    0.01    0.14
   1 -11  -9    0.00    0.15
  -1  11   9   -0.24    0.15
   1  11  -9    0.07    0.17
   0 -11  -9    1.11    0.20
   0 -11   9    1.29    0.21
   0  11  -9    1.09    0.22
   0  11   9    1.02    0.21
   1 -11   9    4.28    0.31
   1 -11   9    4.27    0.30
   1  11   9    3.99    0.35
   2 -11   9    0.40    0.17
   2 -11   9    0.71    0.21
   2  11   9    0.42    0.19
   3 -11   9    0.00    0.15
   3 -11   9    0.17    0.21
   3  11   9   -0.14    0.16
   3 -12  -9    0.53    0.18
  -3  12   9    0.59    0.16
   3  12  -9    0.38    0.18
  -3  12   9    0.98    0.21
   2 -12  -9    0.60    0.18
   2  12  -9    0.56    0.19
  -2  12   9    0.29    0.19
  -2  12   9    0.67    0.15
   1 -12  -9    0.40    0.18
  -1 -12   9    0.66    0.18
   1  12  -9    0.47    0.20
  -1  12   9    0.44    0.17
   0 -12   9    2.03    0.25
   0 -12  -9    2.36    0.25
   0  12   9    2.31    0.27
   0  12  -9    2.07    0.26
   1 -12   9   -0.03    0.16
   1 -12   9   -0.11    0.16
   1  12   9   -0.05    0.16
   2 -12   9   -0.06    0.14
   2 -12   9   -0.17    0.17
   2  12   9   -0.03    0.16
   3 -13  -9    0.23    0.16
   3  13  -9    0.20    0.17
  -3  13   9    0.35    0.18
   2 -13  -9    5.21    0.36
   2  13  -9    5.24    0.39
  -2  13   9    4.54    0.27
  -2  13   9    4.40    0.35
  -1 -13   9   16.00    0.56
   1 -13  -9   15.27    0.58
  -1  13   9   14.91    0.56
   1  13  -9   14.50    0.59
   0 -13   9    1.21    0.22
   0 -13  -9    1.25    0.21
   0  13   9    1.07    0.21
   0  13  -9    0.93    0.23
   1 -13   9   -0.12    0.16
   1 -13   9    0.18    0.16
   1  13   9    0.27    0.18
   2 -13   9   -0.08    0.17
   2 -13   9   -0.27    0.13
   2  13   9    0.03    0.17
   3 -14  -9    0.11    0.15
   3  14  -9    0.03    0.17
  -3  14   9   -0.05    0.18
   2 -14  -9   -0.01    0.14
  -2  14   9   -0.12    0.19
   2  14  -9    0.08    0.18
  -2  14   9   -0.03    0.13
   1 -14  -9    1.84    0.25
  -1 -14   9    2.25    0.25
   1  14  -9    1.87    0.27
  -1  14   9    1.67    0.25
   0 -14   9    2.12    0.26
   0 -14  -9    2.07    0.25
   0  14  -9    1.93    0.27
   0  14   9    1.72    0.26
   1 -14   9    0.87    0.20
   1 -14   9    0.44    0.19
   1  14   9    0.59    0.19
   2 -14   9    0.01    0.18
   2 -14   9   -0.05    0.16
   2  14   9    0.04    0.17
   3 -15  -9    0.17    0.16
   3  15  -9    0.02    0.18
  -3  15   9    0.34    0.20
   2 -15  -9    0.09    0.15
   2  15  -9    0.08    0.18
  -2  15   9   -0.26    0.18
  -2  15   9    0.16    0.13
  -1 -15   9    2.40    0.26
   1 -15  -9    2.17    0.26
  -1  15   9    2.13    0.27
   1  15  -9    2.22    0.29
   0 -15  -9    1.42    0.23
   0 -15   9    1.71    0.24
   0  15   9    1.59    0.26
   0  15  -9    1.33    0.25
   1 -15   9    1.85    0.25
   1 -15   9    2.21    0.26
   1  15   9    2.08    0.28
   2 -15   9   -0.32    0.16
   2 -15   9    0.34    0.20
   2  15   9    0.07    0.18
   3 -16  -9    0.44    0.19
   3  16  -9   -0.05    0.18
  -3  16   9    0.75    0.23
   2 -16  -9    1.06    0.21
   2  16  -9    0.94    0.22
  -2  16   9    0.94    0.17
  -1 -16   9    4.34    0.34
   1 -16  -9    3.82    0.32
  -1  16   9    3.74    0.33
   1  16  -9    3.87    0.35
   0 -16  -9    0.13    0.17
   0 -16   9   -0.04    0.16
   0  16  -9    0.15    0.20
   0  16   9    0.04    0.19
   1 -16   9    1.19    0.23
   1 -16   9    1.10    0.24
   1  16   9    1.39    0.25
   2 -16   9    1.76    0.28
   2 -16   9    1.21    0.24
   2  16   9    1.89    0.28
   2 -17  -9    1.55    0.24
   2  17  -9    1.19    0.25
   1 -17  -9    1.27    0.23
  -1  17   9    1.41    0.24
   1  17  -9    1.33    0.26
   0 -17  -9    3.78    0.34
   0 -17   9    3.96    0.36
   0  17   9    4.10    0.39
   0  17  -9    4.17    0.39
   1 -17   9    9.67    0.50
   1  17   9    9.24    0.52
   2 -17   9    3.40    0.33
   2 -17   9    3.50    0.36
   2  17   9    2.61    0.32
   2 -18  -9    0.29    0.18
   2  18  -9    0.12    0.20
   1 -18  -9   -0.01    0.17
   1  18  -9    0.14    0.21
  -1  18   9    0.14    0.19
   0 -18   9    0.18    0.17
   0  18  -9    0.20    0.21
   0  18   9    0.00    0.19
   1 -18   9   18.76    0.68
   1  18   9   19.94    0.74
   2 -19  -9    0.76    0.21
   2  19  -9    0.81    0.24
   1 -19  -9   -0.07    0.15
  -1  19   9   -0.26    0.16
   1  19  -9    0.03    0.19
   0 -19   9    0.21    0.19
   0  19   9    0.06    0.20
   0  19  -9    0.38    0.21
   1 -19   9    5.64    0.43
   1  19   9    6.21    0.46
   2 -20  -9    3.86    0.34
   2  20  -9    2.93    0.35
   1 -20  -9   -0.17    0.16
   1  20  -9   -0.09    0.19
   0 -20   9    0.94    0.22
   0  20   9    0.77    0.24
   1 -20   9    4.32    0.36
   1  20   9    4.63    0.43
   1 -21  -9    0.52    0.21
   1  21  -9    0.54    0.24
   0 -21   9    1.43    0.25
   0  21   9    0.77    0.25
   3   0 -10   -0.04    0.13
  -3   0  10    0.11    0.13
   2   0 -10    2.39    0.27
  -2   0  10    2.79    0.22
  -1   0  10   34.92    0.74
  -1   0  10   34.96    0.93
   1   0 -10   35.76    0.98
   0   0  10   32.38    0.90
   0   0 -10   32.56    0.91
   1   0  10    1.23    0.22
   2   0  10    2.05    0.26
  -3  -1  10   -0.02    0.13
   3  -1 -10   -0.10    0.14
  -3   1  10   -0.08    0.13
   3   1 -10    0.01    0.15
  -2  -1  10   -0.03    0.12
   2  -1 -10   -0.01    0.16
  -2   1  10    0.07    0.12
   2   1 -10   -0.02    0.15
   1  -1 -10    0.26    0.20
  -1  -1  10    0.72    0.14
  -1  -1  10    0.10    0.18
  -1   1  10    0.36    0.20
  -1   1  10    0.91    0.15
   1   1 -10    0.71    0.20
   0  -1 -10    5.43    0.40
   0  -1  10    6.15    0.41
   0   1  10    5.95    0.41
   0   1 -10    5.86    0.40
   1  -1  10   -0.02    0.14
   1   1  10   -0.22    0.13
   2  -1  10    0.68    0.18
   2   1  10    0.92    0.21
  -3  -2  10    0.09    0.13
   3  -2 -10   -0.05    0.14
   3   2 -10    0.08    0.15
  -3   2  10    0.09    0.14
  -2  -2  10    0.36    0.13
   2  -2 -10    0.44    0.19
   2   2 -10    0.29    0.18
  -2   2  10    0.37    0.13
  -1  -2  10    9.79    0.44
   1  -2 -10    9.09    0.49
  -1  -2  10    9.93    0.34
  -1   2  10    8.80    0.46
  -1   2  10    9.51    0.34
   1   2 -10   10.10    0.49
   0  -2  10    2.08    0.26
   0  -2 -10    2.16    0.28
   0   2  10    2.05    0.26
   0   2 -10    2.45    0.28
   1  -2  10    0.47    0.18
   1   2  10    0.32    0.18
   2  -2  10   -0.15    0.15
   2   2  10    0.10    0.17
   3  -3 -10    0.05    0.15
  -3  -3  10    0.20    0.13
  -3   3  10   -0.05    0.12
   3   3 -10    0.00    0.15
   2  -3 -10    0.23    0.17
  -2  -3  10    0.27    0.12
  -2   3  10    0.35    0.13
   2   3 -10    0.16    0.17
  -1  -3  10   18.26    0.61
   1  -3 -10   17.92    0.65
  -1  -3  10   18.02    0.46
  -1   3  10   17.76    0.63
   1   3 -10   17.68    0.63
  -1   3  10   18.32    0.49
   0  -3 -10   22.62    0.74
   0  -3  10   24.60    0.73
   0   3  10   22.89    0.74
   0   3 -10   23.47    0.74
   1  -3  10    0.61    0.19
   1   3  10    1.07    0.21
   2  -3  10   -0.07    0.16
   2   3  10   -0.09    0.16
   3  -4 -10    0.03    0.15
  -3  -4  10    0.14    0.13
  -3   4  10    0.16    0.14
   3   4 -10    0.04    0.16
   2  -4 -10    0.07    0.17
  -2  -4  10    0.34    0.13
   2   4 -10    0.04    0.17
  -2   4  10    0.04    0.11
  -1  -4  10    9.54    0.32
   1  -4 -10    8.58    0.47
  -1  -4  10    9.23    0.44
   1   4 -10    9.32    0.48
  -1   4  10    9.42    0.34
  -1   4  10    8.07    0.45
   0  -4  10    4.40    0.32
   0  -4 -10    3.66    0.37
   0   4 -10    4.49    0.37
   0   4  10    3.52    0.37
   1  -4  10   -0.05    0.15
   1   4  10   -0.11    0.15
   2  -4  10    0.04    0.15
   2   4  10   -0.19    0.16
   3  -5 -10    0.42    0.18
   3   5 -10    0.36    0.18
  -3   5  10    0.43    0.16
  -2  -5  10    4.04    0.23
   2  -5 -10    3.64    0.31
  -2   5  10    3.64    0.25
   2   5 -10    3.29    0.31
   1  -5 -10    2.70    0.29
  -1  -5  10    3.62    0.21
  -1  -5  10    3.30    0.32
  -1   5  10    2.90    0.29
   1   5 -10    3.36    0.32
   0  -5  10    1.04    0.21
   0  -5 -10    0.73    0.22
   0  -5  10    0.98    0.14
   0   5 -10    1.25    0.23
   0   5  10    0.64    0.22
   1  -5  10   -0.03    0.15
   1   5  10    0.12    0.17
   2  -5  10    1.13    0.22
   2   5  10    1.06    0.23
   3  -6 -10    0.05    0.14
   3   6 -10    0.19    0.15
  -3   6  10    0.08    0.14
   2  -6 -10    0.21    0.17
  -2  -6  10    0.09    0.12
   2   6 -10    0.01    0.17
  -2   6  10    0.17    0.12
  -1  -6  10    3.46    0.32
   1  -6 -10    2.53    0.29
  -1  -6  10    3.37    0.20
  -1   6  10    3.02    0.30
   1   6 -10    2.79    0.30
   0  -6 -10   -0.10    0.18
   0  -6  10    0.72    0.19
   0   6 -10    0.70    0.20
   0   6  10   -0.33    0.16
   1  -6  10    0.01    0.16
   1   6  10    0.20    0.17
   2  -6  10    0.73    0.20
   2   6  10    0.61    0.20
   3  -7 -10    0.44    0.18
   3   7 -10    0.40    0.18
  -3   7  10    0.31    0.16
   2  -7 -10    0.08    0.15
  -2  -7  10    0.25    0.12
   2   7 -10    0.13    0.17
  -2   7  10   -0.02    0.13
  -1  -7  10   -0.09    0.15
   1  -7 -10   -0.20    0.15
  -1   7  10   -0.24    0.14
   1   7 -10   -0.16    0.15
   0  -7 -10    0.08    0.18
   0  -7  10    0.43    0.18
   0   7  10    0.12    0.19
   0   7 -10    0.40    0.19
   1  -7  10    0.25    0.17
   1   7  10    0.10    0.17
   2  -7  10    4.80    0.36
   2  -7  10    4.64    0.35
   2   7  10    4.39    0.37
   3  -8 -10    0.12    0.17
   3   8 -10    0.14    0.17
   2  -8 -10    1.38    0.22
  -2   8  10    1.31    0.18
   2   8 -10    1.19    0.23
   1  -8 -10    0.13    0.18
  -1  -8  10    0.28    0.17
  -1   8  10   -0.11    0.16
   1   8 -10    0.05    0.18
   0  -8 -10   -0.18    0.16
   0  -8  10    0.23    0.16
   0   8  10   -0.15    0.18
   0   8 -10    0.12    0.18
   1  -8  10    0.39    0.17
   1   8  10    0.43    0.19
   2  -8  10    0.23    0.21
   2  -8  10    0.18    0.18
   2   8  10    0.32    0.19
   3  -9 -10    0.60    0.20
  -3   9  10    0.68    0.19
   3   9 -10    0.63    0.20
   2  -9 -10    0.45    0.19
  -2   9  10    0.36    0.16
   2   9 -10    0.24    0.19
  -2   9  10    0.31    0.15
   1  -9 -10    9.02    0.47
  -1  -9  10   10.05    0.45
   1   9 -10    9.24    0.47
  -1   9  10    9.01    0.46
   0  -9  10    0.21    0.17
   0  -9 -10   -0.05    0.17
   0   9 -10    0.08    0.18
   0   9  10    0.03    0.18
   1  -9  10   -0.06    0.16
   1   9  10   -0.08    0.17
   2  -9  10    0.46    0.19
   2  -9  10    0.13    0.21
   2   9  10   -0.02    0.18
   3 -10 -10    0.73    0.20
   3  10 -10    0.75    0.21
  -3  10  10    0.94    0.21
   2 -10 -10    2.88    0.29
   2  10 -10    3.22    0.34
  -2  10  10    3.02    0.25
  -2  10  10    3.79    0.33
   1 -10 -10    0.68    0.21
  -1 -10  10    0.50    0.18
   1  10 -10    0.60    0.22
  -1  10  10    0.82    0.21
   0 -10 -10    1.45    0.24
   0 -10  10    1.29    0.23
   0  10  10    1.03    0.23
   0  10 -10    1.61    0.26
   1 -10  10    0.02    0.17
   1  10  10    0.12    0.18
   2 -10  10    0.55    0.20
   2 -10  10    0.63    0.23
   2  10  10    0.75    0.22
   3 -11 -10    2.42    0.28
  -3  11  10    3.59    0.34
   3  11 -10    2.64    0.31
   2 -11 -10    1.58    0.25
   2  11 -10    1.43    0.26
  -2  11  10    1.70    0.21
  -2  11  10    2.19    0.26
  -1 -11  10    0.31    0.18
   1 -11 -10    0.21    0.18
  -1  11  10    0.03    0.17
   1  11 -10    0.21    0.18
   0 -11 -10    0.99    0.22
   0 -11  10    1.33    0.22
   0  11  10    1.08    0.23
   0  11 -10    1.10    0.23
   1 -11  10    0.17    0.18
   1  11  10    0.12    0.19
   2 -11  10   -0.05    0.20
   2 -11  10    0.05    0.18
   2  11  10    0.33    0.20
   3 -12 -10    1.87    0.27
  -3  12  10    2.32    0.28
   3  12 -10    2.08    0.29
   2 -12 -10    0.14    0.18
  -2  12  10   -0.08    0.17
  -2  12  10    0.32    0.15
   2  12 -10    0.08    0.19
  -1 -12  10    2.84    0.28
   1 -12 -10    2.96    0.31
   1  12 -10    2.59    0.31
  -1  12  10    3.00    0.31
   0 -12  10    4.74    0.37
   0 -12 -10    4.41    0.35
   0  12  10    4.22    0.39
   0  12 -10    4.71    0.40
   1 -12  10   -0.41    0.15
   1  12  10   -0.11    0.17
   2 -12  10    0.00    0.18
   2 -12  10   -0.14    0.20
   2  12  10   -0.28    0.17
   2 -13 -10    0.22    0.19
   2  13 -10    0.15    0.18
  -2  13  10    0.07    0.19
   1 -13 -10    4.02    0.36
   1  13 -10    4.04    0.37
  -1  13  10    4.35    0.38
   0 -13  10    1.28    0.24
   0  13  10    0.69    0.23
   0  13 -10    1.15    0.26
   1 -13  10   -0.28    0.18
   1  13  10   -0.04    0.16
   2 -13  10   -0.10    0.17
   2 -13  10   -0.09    0.19
   2  13  10    0.05    0.20
   2 -14 -10    2.59    0.30
   2  14 -10    2.79    0.33
  -2  14  10    2.63    0.30
   1 -14 -10    0.04    0.18
  -1  14  10   -0.02    0.17
   1  14 -10    0.06    0.19
   0 -14  10    2.18    0.27
   0  14 -10    2.02    0.29
   0  14  10    2.12    0.29
   1 -14  10   -0.41    0.17
   1 -14  10   -0.31    0.16
   1  14  10   -0.06    0.19
   2 -15 -10    0.10    0.17
   2  15 -10    0.18    0.19
  -2  15  10   -0.19    0.19
   1 -15 -10    0.56    0.20
   1  15 -10    0.57    0.22
  -1  15  10    0.40    0.20
   0 -15  10    1.68    0.25
   0  15 -10    1.59    0.28
   0  15  10    1.36    0.27
   1 -15  10    1.73    0.28
   1  15  10    1.70    0.29
   2 -16 -10    0.09    0.18
  -2  16  10   -0.46    0.19
   2  16 -10   -0.10    0.19
   1 -16 -10   -0.09    0.16
   1  16 -10    0.03    0.18
   0 -16  10    3.83    0.36
   0  16  10    3.76    0.39
   1 -16  10    0.60    0.23
   1  16  10    0.80    0.25
   1 -17 -10    0.31    0.20
   1  17 -10    0.18    0.21
   0 -17  10    0.26    0.20
   0  17  10   -0.08    0.20
   1 -18 -10    0.06    0.19
   1  18 -10    0.26    0.22
   0 -18  10    0.65    0.22
   0  18  10    0.19    0.22
   3   0 -11   -0.23    0.19
  -3   0  11    0.01    0.16
  -2   0  11    0.15    0.13
   2   0 -11   -0.24    0.16
   1   0 -11   -0.15    0.17
  -1   0  11   -0.02    0.14
  -1   0  11   -0.06    0.12
   0   0 -11   -0.22    0.21
   0   0  11    0.02    0.21
   1   0  11   -0.02    0.18
   2   0  11   -0.11    0.17
  -3  -1  11    6.79    0.35
   3  -1 -11    6.51    0.45
  -3   1  11    7.49    0.37
   3   1 -11    6.22    0.45
  -2  -1  11    0.17    0.13
   2  -1 -11    0.01    0.16
  -2   1  11    0.17    0.13
   2   1 -11    0.19    0.19
   1  -1 -11   -0.05    0.18
  -1  -1  11    0.02    0.12
  -1  -1  11    0.04    0.16
  -1   1  11    0.20    0.17
   1   1 -11   -0.15    0.17
  -1   1  11    0.00    0.13
   0  -1  11    5.14    0.39
   0  -1 -11    4.01    0.43
   0   1  11    3.81    0.39
   0   1 -11    5.16    0.43
   1  -1  11    1.24    0.24
   1   1  11    1.29    0.25
   2  -1  11    0.15    0.18
   2   1  11   -0.09    0.17
   3  -2 -11    6.46    0.45
  -3  -2  11    6.93    0.35
  -3   2  11    6.74    0.36
   3   2 -11    6.74    0.46
  -2  -2  11    2.38    0.22
   2  -2 -11    2.02    0.28
   2   2 -11    2.18    0.29
  -2   2  11    2.31    0.22
  -1  -2  11    0.11    0.13
  -1  -2  11    0.26    0.17
   1  -2 -11    0.18    0.20
  -1   2  11    0.17    0.14
  -1   2  11    0.19    0.16
   1   2 -11    0.19    0.19
   0  -2  11   43.73    1.12
   0  -2 -11   40.29    1.12
   0   2 -11   42.71    1.14
   0   2  11   41.61    1.12
   1  -2  11    0.11    0.18
   1   2  11    0.07    0.18
   2  -2  11    0.00    0.18
   2   2  11    0.06    0.18
  -3  -3  11    3.36    0.27
   3  -3 -11    3.16    0.35
   3   3 -11    3.01    0.34
   2  -3 -11   -0.14    0.16
  -2  -3  11    0.02    0.13
  -2   3  11    0.07    0.12
   2   3 -11   -0.26    0.17
  -1  -3  11    0.10    0.13
  -1  -3  11    0.19    0.17
   1  -3 -11   -0.08    0.18
  -1   3  11    0.10    0.17
   1   3 -11    0.16    0.19
  -1   3  11   -0.02    0.13
   0  -3 -11    2.32    0.32
   0  -3  11    4.15    0.39
   0   3 -11    3.12    0.34
   0   3  11    2.84    0.34
   1  -3  11    0.32    0.18
   1   3  11    0.46    0.21
   2  -3  11    0.13    0.19
   2   3  11    0.22    0.20
   3  -4 -11    3.27    0.35
   3   4 -11    3.54    0.36
  -2  -4  11    1.16    0.17
   2  -4 -11    1.23    0.25
  -2   4  11    0.92    0.17
   2   4 -11    0.91    0.23
  -1  -4  11    0.13    0.17
   1  -4 -11   -0.03    0.18
  -1   4  11   -0.06    0.13
   1   4 -11   -0.15    0.17
  -1   4  11    0.25    0.18
   0  -4  11    4.34    0.39
   0  -4 -11    2.71    0.34
   0   4  11    2.96    0.35
   0   4 -11    3.36    0.34
   1  -4  11    0.41    0.20
   1   4  11    0.42    0.21
   2  -4  11    0.84    0.21
   2   4  11    1.08    0.24
   2  -5 -11   -0.14    0.17
  -2   5  11   -0.09    0.13
   2   5 -11   -0.07    0.17
  -1  -5  11    0.80    0.21
   1  -5 -11    0.68    0.22
  -1   5  11    0.72    0.21
  -1   5  11    0.97    0.17
   1   5 -11    0.93    0.24
   0  -5 -11    2.51    0.33
   0  -5  11    3.36    0.32
   0   5  11    3.20    0.35
   0   5 -11    3.89    0.39
   1  -5  11    0.16    0.19
   1   5  11    0.21    0.20
   2  -6 -11    0.09    0.18
  -2   6  11   -0.20    0.12
   2   6 -11   -0.05    0.18
  -1  -6  11    1.00    0.21
   1  -6 -11    0.96    0.23
  -1   6  11    1.01    0.18
  -1   6  11    0.99    0.22
   1   6 -11    0.63    0.23
   0  -6  11    1.34    0.24
   0   6 -11    1.19    0.25
   0   6  11    0.43    0.25
   1  -6  11    0.13    0.17
   1   6  11   -0.03    0.17
   2  -7 -11    0.94    0.24
  -2   7  11    0.62    0.17
   2   7 -11    0.67    0.23
   1  -7 -11    0.61    0.21
  -1  -7  11    0.71    0.20
  -1   7  11    0.36    0.16
  -1   7  11    0.57    0.20
   1   7 -11    0.61    0.22
   0  -7  11    0.89    0.23
   0   7  11    0.50    0.23
   0   7 -11    0.93    0.24
   1  -7  11    0.30    0.19
   1   7  11    0.20    0.20
   2  -8 -11    2.18    0.29
   2   8 -11    2.07    0.30
  -2   8  11    2.31    0.23
   1  -8 -11    0.92    0.23
  -1   8  11    1.00    0.22
   1   8 -11    0.68    0.23
   0  -8  11    0.62    0.20
   0   8  11    0.10    0.22
   1  -8  11    0.27    0.19
   1   8  11    0.10    0.21
   2  -9 -11    0.43    0.21
   2   9 -11   -0.09    0.18
   1  -9 -11    0.82    0.22
   1   9 -11    0.88    0.23
  -1   9  11    0.82    0.22
   0  -9  11    0.04    0.18
   0   9  11   -0.32    0.19
   1  -9  11    0.03    0.17
   1   9  11   -0.16    0.19
   2 -10 -11    0.32    0.19
   2  10 -11    0.17    0.20
   1 -10 -11    2.57    0.30
   1  10 -11    3.15    0.34
   0 -10  11    2.31    0.28
   0  10  11    2.50    0.31
   1 -10  11   -0.20    0.18
   1  10  11   -0.48    0.18
   2 -11 -11    0.12    0.19
   2  11 -11   -0.05    0.19
   1 -11 -11    0.56    0.22
   1  11 -11    0.82    0.25
   0 -11  11    0.53    0.19
   0  11  11    0.32    0.22
   1 -11  11    0.10    0.19
   1  11  11    0.35    0.22
   1 -12 -11    2.17    0.29
   1  12 -11    2.18    0.31
   0 -12  11    1.21    0.25
   0  12  11    1.22    0.27
   1 -13 -11    0.19    0.20
   1  13 -11    0.23    0.22
   0 -13  11    0.20    0.20
   0  13  11   -0.17    0.20
  -1   0  12    2.72    0.24
   1   0 -12    2.97    0.33
   0   0  12   22.62    0.79
   1  -1 -12    0.31    0.22
  -1   1  12   -0.16    0.14
   1   1 -12    0.03    0.20
   0  -1  12    0.81    0.25
   0   1  12    1.12    0.26
   1  -2 -12   -0.09    0.20
   1   2 -12    0.00    0.19
  -1   2  12   -0.04    0.14
   0  -2  12    0.22    0.20
   0   2  12    0.27    0.21
   1  -3 -12    0.11    0.21
  -1   3  12   -0.18    0.14
   1   3 -12    0.23    0.21
   0  -3  12    0.93    0.24
   0   3  12    0.59    0.25
   1  -4 -12    0.10    0.21
   1   4 -12    0.28    0.22
   0  -4  12    2.41    0.30
   0   4  12    2.22    0.32
   1  -5 -12   -0.21    0.19
  -1   5  12   -0.29    0.14
   1   5 -12   -0.10    0.20
   0  -5  12    0.19    0.20
   0   5  12   -0.02    0.22
   1  -6 -12    0.49    0.23
   1   6 -12    0.28    0.21
   0   0   0    0.00    0.00
;
_shelx_hkl_checksum   13014
